# Supplementary material for: High and stable ATP levels prevent aberrant intracellular protein aggregation in yeast
Source: eLife. 2022 Apr 19;11:e67659. doi: 10.7554/eLife.67659 (PMC9018071; doi:10.7554/eLife.67659)
Supplement: Figure 1—figure supplement 1—source data 1. [file elife-67659-fig1-figsupp1-data1.xlsx]

## Sheet: fig1-supp1B
strain	wt	wt	wt		snf1	snf1	snf1
[glucose] (%)	2	0.2	0.05		2	0.2	0.05		strain	[glucose] (%)	average	SD	cv	N	p-value vs. wt (Welch test)
	0.916316	1.2227	1.06361		0.846842	0.869833	0.655611		wt	2	1.00003	0.119022	0.119018	193
	0.996842	1.15916	1.06997		0.398947	0.48797	0.831895		wt	0.2	1.00019	0.235226	0.235181	163
	1.04053	1.14559	1.05225		0.803158	0.827267	0.765107		wt	0.05	0.999783	0.0862602	0.0862789	111
	0.969474	0.719926	1.07042		0.791053	0.863048	0.572921		snf1	2	0.833442	0.17557	0.210656	141	2.50449e-19
	1.03579	1.24121	1.06679		0.807368	0.863664	0.776011		snf1	0.2	0.854517	0.19784	0.231523	140	6.23519e-09
	1.00947	1.12523	1.07269		0.492105	0.644664	0.844616		snf1	0.05	0.769066	0.107912	0.140316	105	8.12826e-42
	0.988947	1.18137	1.06724		0.776316	0.516348	0.513403
	0.997368	1.16841	1.00227		0.810526	0.871684	0.937301
	1.03421	0.558297	1.02771		0.826842	0.865515	0.907769
	0.962632	0.53794	1.00182		0.842632	0.863048	0.836892
	1.04737	0.526218	1.04498		0.782105	0.899445	0.899591
	0.825789	1.01789	0.968196		0.796842	0.988896	0.719219
	0.970526	1.17643	1.08632		0.812632	0.99013	0.809178
	0.942105	1.23257	1.02999		0.887895	1.01666	0.758746
	1.01579	0.779766	1.12267		0.829474	0.89636	0.770559
	1	1.22332	0.997274		0.400526	0.964837	0.45343
	0.983684	1.18939	1.01272		0.454211	0.923504	0.749659
	0.998421	1.12647	1.05225		1.00421	0.990746	0.807815
	1.05053	1.13017	1.10041		0.866316	0.951265	0.835529
	0.958421	1.05922	0.945934		0.947895	0.555213	0.852794
	0.996842	0.484886	1.005		0.942105	0.83467	0.760563
	0.654211	0.553979	1.02135		0.942105	0.495373	0.712403
	1.01	0.658853	1.10313		0.558947	0.927822	0.761926
	1.02947	1.11104	0.98955		0.469474	0.766194	0.792367
	1.06474	1.09809	1.04952		0.426316	0.951265	0.858701
	1.06316	1.15854	0.988642		0.925789	0.942011	0.511131
	1.02632	1.14374	0.99682		0.926842	0.882788	0.856429
	0.976842	1.08883	0.921854		1.08	0.895743	0.879146
	1.09105	1.19741	0.97274		0.893684	0.971006	0.833258
	1.10368	0.51203	1.18037		0.885789	0.931524	0.833258
	1.01789	0.66132	1.11495		1.02947	0.961135	0.801
	1.01684	0.807526	1.01545		0.986842	1.12955	0.873694
	1.14211	1.11845	1.02272		0.946316	0.464528	0.83871
	1.16789	1.11043	1.08587		0.951053	0.489204	0.786915
	1.07684	1.10364	1.08224		0.966316	0.497841	0.825534
	1.04158	0.516348	1.05952		0.954737	0.986428	0.841436
	1.01421	1.01172	1.04816		0.991579	0.570019	0.795547
	0.866316	1.1752	1.05543		0.870526	0.561382	0.919128
	0.995789	1.10179	1.05134		0.664737	0.942011	0.771468
	0.876842	1.13078	1.03498		0.582105	0.647131	0.867333
	1.09053	0.561999	1.04044		0.447895	0.493523	0.877783
	1.02895	1.12153	1.07542		0.529474	0.641579	0.823716
	1.05737	0.702653	1.04316		0.928421	0.574954	0.855066
	1.05316	1.19803	1.05043		1.03263	0.45219	0.805997
	1.10737	0.525601	1.0159		1.02053	1.06724	0.797365
	0.967895	0.514497	1.01136		0.997895	0.953732	0.781917
	1.10211	0.684146	1.01726		1.03368	0.542258	0.783735
	0.995263	1.04442	1.0736		0.971053	1.03825	0.829623
	1.00316	0.700185	0.977737		1.04263	0.582357	0.68378
	1.02211	1.17643	1.0259		0.955789	0.970389	0.779646
	0.930526	0.967304	1.06043		0.99	0.987045	0.774194
	0.751053	1.05676	1.03498		0.912632	0.920419	0.427079
	1.04474	1.00925	1.06861		0.924211	1	0.890959
	1.03316	0.859346	1.07678		0.421579	0.921036	0.647433
	1.05895	1.19124	1.02499		0.577368	0.966687	0.797819
	1.10211	0.716225	1.02817		0.941053	0.540407	0.519309
	1.05579	0.63356	0.832803		0.865263	1.0037	0.751931
	1.11316	0.553979	0.857338		0.931053	1.09254	0.701954
	1.02789	1.22394	0.600182		0.936842	1.03886	0.840981
	1.02789	1.15423	0.875511		0.915789	0.77483	0.822353
	1.07158	1.22517	0.855066		0.978421	0.803825	0.824625
	1.04	0.528686	0.855066		0.469474	1.02776	0.794639
	0.982632	1.13634	0.869605		0.863158	1.00494	0.815993
	1.03789	0.629858	0.848705		0.984211	1.0802	0.72876
	1.11105	1.08883	0.857792		0.982105	1.04442	0.782372
	0.777895	1.10734	0.868242		0.422105	0.940777	0.708769
	1.07263	1.03886	0.895502		0.954737	0.921036	0.805089
	1.03	0.557064	0.851886		0.679474	0.943862	0.823262
	1.03842	1.12091	0.868696		0.662632	0.663171	0.810541
	1.00895	1.14929	0.893685		0.681053	0.997532	0.585643
	0.946316	0.650216	0.83871		0.920526	0.968538	0.781463
	0.983684	1.06786	0.852794		1.00842	1.03578	0.78328
	1.19105	1.10056	0.883689		0.878421	0.538556	0.587915
	1.04474	0.919186	0.895502		0.489474	0.965453	0.814175
	0.466316	1.08575	0.870513		0.961053	0.879087	0.800545
	1.07211	1.15731	0.82099		0.877895	1.02221	0.774194
	1.04053	1.14929	0.837347		0.935789	0.507711	0.779646
	1.03579	1.06354	0.910495		0.897368	1.03886	0.465697
	0.991579	0.582357	1.01408		0.97	1.09315	0.752385
	1.03526	0.570019	0.985461		0.952105	0.980259	0.79691
	0.857368	1.08513	0.995002		0.91	0.888341	0.78328
	0.835263	0.973473	1.02681		0.622105	0.499075	0.794184
	1.00421	1.21221	1.05997		0.558421	0.580506	0.820536
	0.988421	1.07403	1.05543		0.741053	1.07896	0.815084
	1.01158	0.670574	1.04952		0.95	0.999383	0.838255
	1.03895	1.10981	1.04225		0.851053	0.980876	0.541572
	0.929474	1.11783	1.00909		1.03789	0.619988	0.714221
	0.507368	1.14004	1.00818		1.02	0.752622	0.840527
	1.00474	0.497841	1.07451		1.05895	1.02591	0.736483
	1.02158	1.24738	1.01817		0.817895	0.543492	0.901863
	1.00789	1.20419	1.03589		0.827368	1.01789	0.81781
	0.98	1.16841	1.06679		0.838421	0.986428	0.531122
	0.865789	1.18322	1.03816		0.966842	1.0327	0.834166
	1.02211	1.14004	1.00636		0.925263	0.920419	0.860972
	0.993158	0.603331	1.00363		0.935789	0.902529	0.774194
	1.11105	1.10796	1.02862		0.913158	1.02899	0.81463
	1.04	1.05552	1.02862		0.875263	0.436151	0.814175
	0.975263	1.05861	0.995002		0.922105	0.531154	0.522944
	0.953684	0.919803	1.00045		0.933684	1.03948	0.797819
	0.938421	1.03763	1.00818		0.932105	0.518199	0.803726
	1.00579	0.703886	0.985007		0.853158	0.993831	0.884144
	1.05316	1.1351	1.04225		0.957895	1.03578	0.781009
	0.731053	1.13572	1.08224		0.977895	1.02283	0.76965
	1.04789	0.714374	0.97274		0.963158	0.499075	0.538392
	0.898421	1.26465	1.05225		0.915263	1.06107	0.794639
	0.549474	1.10734	1.05361		0.79	0.629241
	0.538947	0.88649	1.0318		0.811579	0.925355
	1	1.09192	1.01181		1.02421	0.733498
	1.04632	1.07588	1.06452		0.948947	0.930907
	1.03579	1.13634	1.07769		0.765263	0.962986
	0.982632	0.789636	1.03135		0.907895	0.528686
	1.02789	1.11721			0.687368	0.522517
	1.05	1.09315			0.883684	1.05737
	1.02105	1.08143			0.887895	1.04874
	0.641053	1.06909			0.866842	0.967304
	1.01	1.10179			0.899474	0.598396
	1.02263	1.12708			0.458421	1.01234
	1.04684	1.11228			0.955263	1.03393
	1.06789	1.12215			0.824211	1.04133
	1.04316	1.13017			0.825789	1.05861
	1.04947	1.19864			0.950526	0.909315
	1.04579	1.13078			0.391579	0.957434
	1.01421	1.14744			0.902105	0.566934
	0.991579	1.1826			0.874211	0.983961
	1.01579	0.594695			0.886316	0.955583
	1.02211	1.07033			0.821053	1.00679
	1.11316	1.11474			0.806842	0.493523
	1.00053	1.18939			0.447895	0.988896
	1.10474	0.763726			0.857368	1.0401
	1.01	1.14312			0.815789	0.967921
	1.03368	1.16471			0.881053	0.955583
	0.747368	1.11721			0.908947	1.03023
	1.06632	0.777915			0.855789	0.932758
	1.08263	1.15299			0.818421	1.02529
	0.982105	0.543492			0.481053	0.760642
	1.10263	1.22455			0.932632	0.913017
	1.06895	1.08513			0.605789	1.00494
	1.07211	1.16286			0.843158	0.537323
	1.16211	1.07279			0.450526	0.909932
	1.10421	1.15608			1.00737	0.928439
	1.18263	1.19432			1.01842
	0.886316	1.18075
	1.08	0.628007
	1.08684	1.25355
	1.14211	1.21283
	1.00684	1.19432
	1.08579	0.735965
	1.01263	1.19247
	1.02842	0.600247
	0.978947	1.24923
	1.11947	1.35842
	1.13316	1.1314
	1.08947	1.15484
	1.00211	1.19309
	1.04526	1.15176
	1.00158	1.23442
	0.747895	0.718075
	1.04211	1.27082
	1.02474	0.720543
	1.01789	0.718075
	1.09105	1.18445
	0.803684	1.15608
	1.13895	1.21221
	0.997895
	1.01421
	1.03
	1.02263
	1.04632
	1.09474
	1.03316
	1.08632
	0.905789
	1.01316
	1.00579
	1.08
	0.991579
	0.972105
	1.02
	1.12579
	1.13316
	1.04895
	1.11211
	1.06105
	1.06053
	1.00211
	0.578421
	0.571053
	1.03474
	1.02
	1.02211
	0.998947
	0.981053
	0.970526

## Sheet: fig1-supp1C
	wt	snf1	sip1	sip2	gal83		strain	mean	SD	CV	N	p-value vs. wt (Dunnett test)
	1.01078	0.868137	0.815686	0.804412	0.831863		wt	2.0365	0.156706	0.0769486	223
	0.994608	0.914216	0.882843	0.835784	0.79902		snf1∆	1.66219	0.30254	0.182013	229	<0.0001
	0.997059	0.926471	0.852451	0.830392	0.862255		sip1∆	1.70817	0.148604	0.0869964	283	<0.0001
	1.03578	0.559314	0.843137	0.85049	0.893137		sip2∆	1.71713	0.141118	0.0821824	188	<0.0001
	0.910784	0.476471	0.60049	0.845098	0.836765		gal83∆	1.74115	0.177913	0.102182	177	<0.0001
	0.979902	0.893137	0.842157	0.881863	0.863725
	0.983333	0.867647	0.686765	0.886765	0.759804
	0.931863	0.802941	0.833824	0.828922	0.870098
	0.985784	0.860294	0.868627	0.863725	0.921078
	0.956863	0.856863	0.85049	0.552941	0.904902
	0.927451	0.807843	0.894608	0.943627	0.970588
	0.958824	0.84951	0.908824	0.855392	0.8
	1.01373	0.573529	0.823039	0.870098	0.87549
	0.934804	0.928431	0.846078	0.820098	0.851471
	1.01618	0.568627	0.704412	0.861765	0.957353
	0.99951	0.885784	0.890686	0.856373	0.864216
	1.03529	0.866667	0.921078	0.62451	0.840196
	1.0152	0.857353	0.872549	0.851471	0.834804
	0.966667	0.496078	0.913725	0.878431	0.884314
	1.01373	0.90049	0.85	0.871078	0.888235
	0.933333	0.72549	0.890196	0.853922	0.801471
	0.995588	0.694118	0.919118	0.847059	0.831373
	1.01373	0.727941	0.886275	0.867647	0.873039
	0.988725	0.735784	0.928922	0.548529	0.839706
	0.977941	0.731863	0.961765	0.87402	0.891176
	0.945098	0.772059	0.853922	0.912745	0.864216
	0.968137	0.761765	0.869118	0.833333	0.880392
	0.903922	0.706373	0.896569	0.876471	0.872549
	0.973529	0.738235	0.857353	0.866667	0.896078
	0.975	0.455392	0.863235	0.862255	0.930882
	1.04559	0.511275	0.876471	0.880392	0.933333
	0.961275	0.772059	0.94902	0.833333	0.794118
	0.987745	0.771078	0.863235	0.810784	0.907843
	1.05049	0.814216	0.868627	0.853431	0.842157
	1.08333	0.705882	0.842647	0.859804	0.808824
	1.07647	0.746078	0.852941	0.860784	0.834314
	1.12255	0.707353	0.840686	0.846569	0.823039
	1.08137	0.735784	0.839216	0.837255	0.908824
	1.11275	0.751961	0.839216	0.839706	0.814216
	1.07108	0.698529	0.882353	0.890686	0.866667
	1.14167	0.758333	0.711765	0.834314	0.657353
	1.09755	0.90049	0.891176	0.835294	0.909804
	1.09314	0.87598	0.882353	0.851471	0.836275
	1.0348	0.892647	0.873529	0.843137	0.890196
	1.06912	0.906863	0.903922	0.878431	0.877941
	1.03578	0.855392	0.846569	0.841176	0.866667
	0.931863	0.968627	0.870098	0.876471	0.735784
	1.04265	0.909314	0.841667	0.886765	0.461765
	1.05735	0.931373	0.851961	0.901961	0.867157
	1.13775	0.920098	0.912745	0.853922	0.887255
	1.09314	0.977941	0.887255	0.920098	0.917157
	1.09314	0.730392	0.951961	0.878922	0.536765
	1.02549	0.540196	0.841667	0.855882	0.867647
	1.13775	0.852451	0.925	0.95049	0.863725
	1.05539	0.637255	0.835294	0.966667	0.629902
	1.06078	0.922059	0.614706	0.881863	0.870588
	1.06863	0.901961	0.857353	0.939706	0.841176
	1.06275	0.943627	0.904412	0.939706	0.859314
	1.0049	0.857843	0.835294	0.918627	0.896569
	1.08824	0.937255	0.888235	0.892157	0.848529
	1.13382	0.921078	0.838725	0.954902	0.886765
	1.10931	0.940196	0.825	0.981373	0.908333
	1.03824	0.911765	0.925	0.857353	0.920098
	1.10539	0.883333	0.893137	0.872059	0.87451
	1.04265	0.587745	0.864216	0.882353	0.87598
	1.12255	0.943627	0.872549	0.945588	0.904902
	1.10588	0.95	0.876471	0.95	0.882353
	1.05637	0.952451	0.895098	0.852451	0.855392
	0.994608	0.893627	0.836275	0.87402	0.908333
	1.15588	0.895588	0.882353	0.922549	0.884314
	1.14363	0.817157	0.887745	0.935784	0.921078
	1.12549	0.969118	0.934314	0.783333	0.864706
	1.12745	0.857353	0.865196	0.829902	0.910294
	1.06912	0.944118	0.834804	0.923039	0.889216
	1.04804	0.907843	0.855392	0.777451	0.881863
	1.08333	0.97549	0.811765	0.886765	0.868627
	1.09902	0.909804	0.843137	0.801961	0.873039
	1.09412	0.712255	0.838725	0.877941	0.840196
	1.10245	0.952451	0.893137	0.915686	0.817157
	1.00294	0.932843	0.863235	0.89951	0.815686
	1.16127	0.635784	0.95049	0.842157	0.593627
	1.04657	0.872549	0.811765	0.787745	0.853922
	1.04804	0.907353	0.948039	0.905392	0.82451
	0.996569	0.888725	0.87598	0.827451	0.82451
	0.971078	0.867157	0.861275	0.85049	0.887745
	1.00686	0.946078	0.911765	0.878431	0.87549
	1.075	0.945588	0.893627	0.87598	0.582353
	1.01127	0.537255	0.89902	0.855392	0.841667
	1.03725	0.883824	0.883333	0.830882	0.84902
	1.06422	0.971569	0.904412	0.898039	0.880882
	1.03676	0.89902	0.890196	0.883333	0.851961
	1.03235	0.944608	0.891667	0.852451	0.891176
	1.04216	1.00343	0.897549	0.816176	0.832353
	1.06078	0.959314	0.891667	0.819118	0.884314
	1.08137	0.627451	0.864706	0.847059	0.82402
	1.04559	0.893627	0.845588	0.852941	0.828431
	1.09804	0.935294	0.895588	0.847059	0.873039
	1.03824	0.930392	0.830882	0.786765	0.887745
	1.04853	0.884314	0.830392	0.679412	0.72451
	1.0902	0.926961	0.883333	0.886765	0.848039
	1.04216	0.898039	0.858824	0.844118	0.877451
	1.1848	0.90098	0.852451	0.848529	0.896078
	1.1701	0.877451	0.703922	0.840196	0.864706
	1.07549	0.754412	0.544608	0.898039	0.883824
	1.07353	0.936765	0.698039	0.816667	0.822059
	1.09363	0.855392	0.757353	0.883824	0.864706
	1.04902	0.85049	0.715196	0.882353	0.890196
	1.05637	0.921078	0.751471	0.872059	0.839216
	1.15	0.872059	0.7	0.862745	0.833824
	1.09265	0.918137	0.702451	0.851471	0.818137
	1.05784	0.562745	0.706863	0.902941	0.862745
	1.07402	0.955392	0.72402	0.932843	0.879902
	1.05833	0.933333	0.768627	0.891667	0.891667
	1.0598	0.590686	0.682353	0.801471	0.867157
	1.1201	0.898529	0.75049	0.812745	0.856373
	1.08235	0.892647	0.75	0.835294	0.80049
	1.08824	0.909804	0.723529	0.865196	0.843137
	1.05686	0.95049	0.742647	0.831863	0.876471
	0.985294	0.479902	0.746569	0.847059	0.904902
	1.06324	0.970098	0.771078	0.862255	0.870588
	1.01912	0.965196	0.702451	0.898529	0.62451
	1.09706	0.994608	0.760784	0.837745	0.797059
	1.02941	0.90098	0.708824	0.875	0.8
	1.00784	0.948039	0.673529	0.847549	0.952941
	0.942647	0.957353	0.764706	0.860784	0.868137
	1.04902	0.951471	0.753922	0.890196	0.836765
	0.994608	0.970098	0.693137	0.87451	0.883333
	0.991667	0.956373	0.726961	0.916176	0.903431
	1.01225	0.798529	0.757843	0.886275	0.829412
	0.97402	0.939706	0.708824	0.877941	0.885294
	0.987255	0.740686	0.752451	0.890686	0.878922
	0.905882	0.430882	0.739706	0.913725	0.904902
	0.963725	0.794608	0.720098	0.788725	0.902451
	0.994118	0.55	0.973529	0.954412	0.446569
	0.985294	0.74902	0.906863	0.879412	0.895588
	0.789706	0.760294	0.934804	0.916176	0.879412
	0.978922	0.780392	0.902451	0.886765	0.854902
	0.947549	0.548039	0.909804	0.861275	0.832843
	0.986275	0.805882	0.92598	0.920098	0.916667
	0.997549	0.780882	0.891667	0.897059	0.872059
	0.930392	0.531373	0.872059	0.909804	0.817157
	0.938725	0.760784	0.832353	0.892647	0.935294
	1.00343	0.777451	0.884804	0.893137	0.834314
	1.01863	0.807353	0.861275	0.885294	0.687745
	0.971569	0.805392	0.887255	0.751961	0.886765
	0.904412	0.414706	0.916667	0.909314	0.939216
	0.973039	0.592157	0.861765	0.817157	0.476471
	0.982843	0.542647	0.892157	0.833333	0.891176
	0.965686	0.753431	0.879412	0.880882	0.914706
	0.998529	0.821569	0.872549	0.906373	0.87598
	0.973529	0.588725	0.903922	0.903922	0.934804
	0.998039	0.421078	0.886765	0.901471	0.905882
	0.962745	0.868137	0.864706	0.783824	0.808824
	0.941176	0.80098	0.935294	0.742157	0.960294
	0.952451	0.443627	0.918627	0.756863	0.822549
	0.955392	0.743137	0.907353	0.742157	0.933824
	0.925	0.801471	0.864706	0.752451	0.898529
	0.802451	0.762745	0.923039	0.761765	0.90098
	1.00637	0.860784	0.885294	0.731373	0.915686
	0.968137	0.745098	0.935294	0.753431	0.765196
	0.966667	0.573529	0.914706	0.723039	0.993627
	0.983824	0.835294	0.808333	0.768627	0.853431
	0.915686	0.877941	0.962255	0.746078	0.886275
	0.929902	0.891667	0.95098	0.778922	0.898529
	0.886765	0.55098	0.861765	0.740686	0.917647
	0.920588	0.547549	0.907353	0.744118	0.564706
	0.988725	0.601961	0.882353	0.768137	0.923039
	0.864216	0.577451	0.905392	0.768627	0.946569
	0.911275	0.871569	0.917647	0.767647	0.947549
	0.977941	0.964216	0.883333	0.718627	1
	0.893137	0.898039	0.876961	0.803431	0.941176
	0.884804	0.910784	0.87451	0.768627	0.873039
	0.92549	0.852941	0.897059	0.77598	0.902941
	0.871078	0.867647	0.888725	0.785294	0.909314
	0.92402	0.948039	0.870098	0.746569	0.92451
	0.89951	0.533333	0.85049	0.714216	0.896078
	0.935294	0.895098	0.947059	0.769118	0.890196
	0.910784	0.90098	0.918627	0.75098
	0.908824	0.923529	0.864706	0.782843
	0.879412	0.921569	0.893627	0.712255
	0.915196	0.501471	0.934804	0.713725
	0.916176	0.894608	0.927451	0.745588
	0.975	0.933333	0.925	0.747059
	0.945588	0.554412	0.937255	0.715686
	0.884804	0.657843	0.92598	0.753431
	0.806863	0.807843	0.964216	0.770588
	0.942647	0.967647	0.954902	0.769608
	0.926471	0.951961	0.890686	0.767647
	0.895098	0.542157	0.881863
	0.941176	0.894118	0.940196
	0.938725	0.789706	0.793627
	0.876471	0.94902	0.857843
	0.847549	0.876471	0.901961
	0.861275	0.891667	0.82549
	0.894608	0.951471	0.852451
	0.885294	0.90098	0.825
	0.92451	0.981373	0.811765
	0.926471	0.968137	0.842647
	0.893627	0.993137	0.882353
	0.951961	0.982353	0.841176
	0.896569	0.966176	0.792647
	0.904902	0.614706	0.808824
	0.940686	0.982843	0.952451
	0.942157	0.95098	0.819608
	0.959314	0.939216	0.82598
	0.952451	0.878922	0.938235
	0.921569	0.509804	0.867157
	0.937745	0.909804	0.822549
	0.884314	0.551961	0.845098
	0.897059	0.944118	0.812255
	0.963235	0.642157	0.798039
	1.02353	0.985294	0.803431
	0.966176	0.625	0.837255
	0.917157	0.882353	0.845588
	0.929902	0.940686	0.79951
	0.959804	0.905882	0.818627
	0.919118	0.951961	0.875
	0.938725	0.656373	0.854412
	1.00098	0.735784	0.903431
	0.958333	0.868627	0.821078
	0.925	0.930882	0.797059
	0.927451	0.560294	0.836765
	0.943627	0.930882	0.882353
		0.954412	0.895588
		0.95049	0.836275
		0.612255	0.847059
		0.87598	0.819118
		0.873039	0.865686
		0.869118	0.831373
			0.854902
			0.805392
			0.855392
			0.819608
			0.846569
			0.847059
			0.834314
			0.80049
			0.857353
			0.797549
			0.762255
			0.726471
			0.781863
			0.804412
			0.741667
			0.62598
			0.781373
			0.790196
			0.740686
			0.758333
			0.75
			0.793137
			0.789706
			0.77549
			0.839216
			0.744608
			0.738725
			0.768627
			0.791667
			0.786275
			0.764216
			0.773039
			0.798039
			0.766667
			0.769608
			0.784804
			0.778431
			0.720588
			0.760294
			0.788235
			0.793627
			0.797549
			0.734804
			0.805882
			0.839706
			0.790686
			0.692647
			0.784314
			0.794118
			0.782843
			0.813235
			0.788725
			0.756373
			0.682353

## Sheet: fig1-supp1D
	wt	mig1	snf1
	1.03674	0.987034	0.927066			strain	mean	SD	cv	N	p-value vs. mig1 (Dunnett test)
	1.01135	0.889249	1.02323			wt	1.85127	0.100227	0.0541394	190	0.0003
	1.04214	1.11237	0.866559			mig1	1.78052	0.128641	0.0722493	231
	1.0524	1.04916	0.972988			snf1	1.61363	0.289062	0.179137	199	<0.0001
	0.99946	0.910319	0.881145
	1.05727	1.02377	0.942193
	1.08482	0.921664	0.914641
	1.07726	1.00432	0.865478
	0.971907	0.917342	1.03404
	1.01945	0.883306	0.855213
	0.944895	0.988115	0.680713
	0.985413	0.895732	0.940032
	1.06267	0.954619	0.952998
	1.03404	0.918422	0.873042
	1.0497	0.964884	0.901675
	0.980551	1.01189	0.957861
	0.957861	0.960022	0.954079
	0.944354	0.95678	0.616964
	0.981632	0.976229	0.755808
	0.975689	0.947596	0.512156
	1	0.932469	0.658563
	0.970827	0.971907	0.927066
	0.936251	0.904916	0.931388
	0.951918	0.9557	0.937331
	0.953539	0.962723	0.806591
	0.951378	1.05565	0.783901
	0.969206	0.982172	0.823339
	0.983793	0.947596	0.759589
	0.988655	1.05511	0.690438
	1.03404	1.02809	0.519719
	0.99946	1.04808	0.775797
	1.01891	0.950837	0.818476
	1.01351	0.898974	0.746083
	0.988115	0.996218	0.49919
	0.981091	1.00432	0.831442
	0.968666	0.985413	0.432739
	0.97839	0.929227	0.559157
	1.00108	0.949757	0.808212
	1.00216	0.927066	0.490005
	0.938412	1.09346	0.794706
	1.11615	0.948136	0.538628
	1.05943	0.987034	0.54295
	0.799568	0.84819	0.78228
	0.969206	0.995678	0.856834
	0.990276	0.943814	0.82658
	0.936791	1.0081	0.71637
	0.980551	0.972447	0.454889
	1.04106	0.988655	0.706105
	1.02161	1.07131	0.961102
	1.05511	1.08428	1.02755
	0.993517	0.89087	0.958401
	1.03404	0.957861	0.963803
	0.974608	0.995678	0.729876
	0.991896	0.810373	0.993517
	0.981091	1.01026	0.940032
	0.995138	0.996218	0.901135
	0.962183	1.02377	0.703404
	1.05132	0.998379	0.871421
	0.954079	1.0389	1.03512
	1.00054	0.984873	0.820637
	1.01837	1.02323	0.624527
	0.994057	1.01999	0.873582
	0.931388	1.07834	0.894652
	0.994598	1.01459	0.889789
	0.923825	0.992437	1.10481
	1.05348	1.01675	0.969746
	0.93517	1.00054	0.722312
	1.09833	0.937871	0.958401
	1.0832	0.919503	0.965964
	0.967045	0.971907	1.05889
	1.15019	0.953539	1.06699
	1.00324	0.93409	0.951378
	0.943814	0.82658	0.727715
	1.00756	1.07618	0.949217
	1.05402	1.05943	0.576445
	1.07455	1.02107	0.658563
	1.09076	0.995138	0.97893
	1.0497	1.05619	0.737979
	1.00162	1.04646	0.918422
	1.03404	1.07347	0.927066
	1.0054	0.980011	1.01945
	1.01621	1.02593	0.585089
	1.05565	0.97839	0.56618
	1.03187	1.04754	0.923285
	0.900594	1.08158	1.00918
	0.823339	1.02431	0.538628
	0.982712	1.01513	0.946515
	0.919503	0.97731	0.975689
	0.89087	0.997839	0.928687
	0.949217	0.930848	0.965964
	1.00864	0.995138	0.904376
	0.944354	0.943814	0.828201
	0.897353	0.914641	0.97839
	0.920583	0.943814	1.01297
	0.936251	0.909778	0.821178
	0.945435	0.915721	0.996759
	1.02809	0.966505	1.06159
	0.968125	0.981091	0.959481
	1.0081	0.982712	0.937331
	0.927066	0.971907	0.963803
	1.01999	0.97731	0.971367
	0.993517	1.01891	0.95678
	1.02701	1.02431	1.0054
	0.998379	0.925446	0.941113
	1.00378	0.968666	0.981632
	1.00918	0.947596	1.0108
	0.994057	1.01621	1.04754
	1.03836	0.958401	0.561318
	0.973528	0.952458	0.778498
	0.957861	0.933009	0.918422
	1.0443	0.969746	0.919503
	1.09724	1.04646	0.979471
	1.01945	1.01945	0.905997
	0.967045	1.06915	1.03187
	1.02539	0.971367	0.998379
	1.07834	0.992437	1.03998
	1.04538	1.03296	0.965964
	1.10751	0.664506	1.02107
	0.986494	0.930848	0.987574
	1.02215	0.979471	0.990816
	0.984873	0.974068	1.05673
	0.937331	0.952458	0.698001
	1.02701	0.952458	0.929768
	0.960562	0.957861	0.545651
	0.936251	0.925986	0.938952
	0.962183	0.895732	0.911939
	0.971907	0.898433	0.89087
	0.928687	0.95678	0.983252
	0.911939	0.923285	0.924905
	0.945435	0.985954	0.990276
	0.985954	0.877364	0.592112
	0.923285	1.0027	0.971367
	1.1356	0.972447	0.917882
	1.01999	1.01351	0.898974
	0.994598	0.925986	0.951378
	0.990816	0.82712	0.944354
	1.00864	0.86872	0.949757
	0.930848	0.902755	0.5208
	0.994598	0.929227	0.541329
	1.01621	1.0389	0.780659
	1.04214	0.902755	1.04538
	0.952998	1.02377	1.05024
	1.00324	0.95624	0.979471
	1.08374	0.948136	1.11777
	1.01567	0.91302	0.775797
	1.01891	0.961102	0.943274
	1.04376	0.976229	1.08374
	1.04106	0.916261	0.992977
	1.07185	0.940032	0.997299
	1.02323	0.976769	0.955159
	1.0443	0.99946	0.614803
	1.01189	0.898974	0.988655
	0.995138	0.903296	0.91302
	0.985954	0.980011	0.925986
	0.989195	0.988115	0.958401
	1.05078	0.95624	0.638033
	1.01891	0.97839	1.01351
	1.01837	0.939492	0.928687
	1	1.02431	0.640735
	1.00108	0.997839	0.835764
	0.976229	0.972447	0.944354
	0.989195	0.980011	0.974068
	0.939492	1.05186	0.749325
	0.952998	0.942734	0.960022
	0.983252	0.969746	0.445705
	0.987574	0.995678	0.928147
	1.03079	0.97785	0.737439
	0.816316	0.886548	0.992977
	0.945435	0.947056	1.07077
	1.0081	0.73906	1.01621
	0.994057	0.910319	0.941653
	1.0778	0.910319	1.09616
	0.9141	0.923825	1.05348
	1.04106	1.00648	0.917342
	1.00918	0.901135	0.965964
	1.047	0.991356	0.702863
	0.97893	0.95678	0.970286
	1.09616	0.97839	0.877904
	0.962183	0.928687	0.704484
	1.04322	0.747704	0.884927
	1.05943	0.97839	0.874122
	1.09562	0.942734	0.969206
	1.09833	0.814155	0.707185
	1.01405	0.943274	0.65154
	1.03674	0.961102	0.937331
	1.01891	1.02701	0.93517
	1.0054	0.958941	0.930308
	1.06483	0.700162	0.989735
	1.07618	1.00594	0.987574
	1.00216	0.985954	0.971367
		0.91248	1.00108
		1.00162	0.84819
		1.01729	1.01567
		1.01297	1.05132
		1.02701	0.735818
		1.01999	1.08374
		0.786602	0.817396
		0.995138	0.941653
		1.07023	0.916802
		0.970286
		1.10427
		0.964884
		0.982172
		1.0108
		0.921664
		0.915181
		1.01675
		0.902755
		0.811453
		1.00054
		0.985413
		0.701243
		0.972447
		0.686116
		0.997299
		0.874122
		0.911399
		0.953539
		0.965424
		0.91302
		0.875203
		0.922744
		1.00216
		0.989195
		0.972447
		0.921664
		0.930848
		0.917342
		0.901135
		0.969746
		0.992437
