# Supplementary material for: High and stable ATP levels prevent aberrant intracellular protein aggregation in yeast
Source: eLife. 2022 Apr 19;11:e67659. doi: 10.7554/eLife.67659 (PMC9018071; doi:10.7554/eLife.67659)
Supplement: Figure 1—figure supplement 2—source data 1. [file elife-67659-fig1-figsupp2-data1.xlsx]

## Sheet: fig1-supp2B
strain	wt	adk1	wt	adk1
sugar	glucose	glucose	galactose	galactose		strain	sugar	average	SD	N	CV	p-value vs. wt (Welch test)
	1.778	1.52	1.854	1.392		wt	glucose	1.74266	0.226483	238	0.129964
	1.769	1.624	1.906	1.368		adk1	glucose	1.48315	0.158812	182	0.107077	3.49386e-36
	1.687	0.96	1.879	1.132		wt	galactose	1.75222	0.291028	198	0.166091
	1.754	1.402	1.072	1.263		adk1	galactose	1.22461	0.296444	226	0.242072	2.16641e-59
	1.695	1.549	1.975	1.452
	1.834	1.516	1.904	1.502
	1.776	1.192	1.958	0.762
	1.772	1.522	1.855	1.077
	1.372	1.081	1.901	0.98
	1.783	1.47	1.789	1.076
	1.798	1.473	1.864	0.766
	1.776	1.548	1.271	0.701
	1.782	1.55	1.918	0.631
	1.763	1.508	1.844	0.75
	1.808	1.548	1.794	1.274
	1.602	1.643	1.939	0.667
	1.718	1.55	2.037	1.572
	1.69	1.5	1.988	1.146
	1.761	0.865	1.943	0.692
	1.756	1.592	1.781	1.478
	1.795	1.472	1.751	1.179
	1.68	1.444	1.839	1.27
	1.854	1.484	1.925	1.015
	1.825	1.439	1.97	1.264
	1.841	1.504	1.784	1.039
	1.805	1.315	1.891	0.998
	1.717	1.578	1.84	1.604
	1.683	1.469	1.088	1.02
	1.73	1.661	1.873	1.081
	1.02	1.332	1.205	1.152
	1.806	1.402	1.06	1.428
	1.743	1.389	1.896	0.961
	1.721	1.482	1.115	0.637
	1.821	1.514	1.961	0.913
	1.772	1.471	2.018	0.614
	1.73	1.497	1.899	0.597
	1.81	1.366	1.617	0.652
	1.76	1.42	1.559	0.618
	1.871	1.515	1.205	0.963
	1.903	1.6	1.601	1.065
	1.898	1.441	1.887	0.973
	1.904	1.271	1.424	1.01
	1.894	1.497	1.985	1.422
	1.788	1.389	2.078	0.796
	1.837	1.428	2.026	1.543
	1.771	1.633	1.967	0.862
	1.913	1.277	1.924	1.325
	1.855	1.381	2.032	0.922
	1.098	1.379	1.784	1.412
	1.853	1.474	1.892	0.902
	1.723	1.597	1.92	1.624
	1.687	1.092	1.972	1.63
	1.951	1.531	1.86	0.889
	1.322	1.407	1.919	1.574
	1.724	1.436	1.972	0.7
	1.261	1.409	2	1.216
	1.381	1.536	1.944	0.928
	1.96	1.359	1.943	0.939
	1.896	1.327	1.908	1.093
	1.938	1.431	1.907	0.656
	1.917	1.09	1.949	1.246
	1.504	1.42	1.841	1.464
	1.964	1.424	1.959	1.132
	0.847	1.588	1.954	1.021
	1.895	1.514	1.341	0.708
	1.751	1.246	2.166	1.398
	1.275	1.58	1.89	1.118
	1.786	1.498	1.975	1.137
	1.822	1.495	1.095	1.185
	1.841	1.533	1.546	1.621
	1.805	1.69	1.706	1.273
	1.769	1.181	1.351	1.46
	0.962	1.183	1.654	1.74
	1.979	1.477	1.599	1.364
	1.721	1.534	1.671	0.928
	1.886	1.446	1.638	1.177
	1.833	1.386	1.672	1.003
	1.824	1.542	1.702	0.935
	1.915	1.132	1.652	1.256
	1.903	1.706	1.569	1.025
	1.931	1.677	1.019	1.117
	1.878	1.343	1.672	1.079
	1.943	1.6	1.653	0.864
	1.884	1.495	1.523	0.88
	1.81	1.633	1.59	0.774
	1.965	1.604	1.662	0.846
	1.851	1.466	1.253	1.328
	1.859	1.53	1.793	0.642
	1.862	1.616	1.639	1.113
	1.588	1.432	1.662	1.476
	1.871	1.35	1.486	0.665
	1.736	1.554	1.056	1.074
	1.889	1.698	1.696	1.222
	1.832	1.607	1.218	1.326
	1.81	1.492	1.684	1.28
	1.366	1.514	1.583	1.067
	1.81	1.517	1.137	1.349
	1.635	1.432	1.61	1.125
	1.911	1.395	1.017	1.124
	1.397	1.396	1.682	1.204
	1.993	1.58	1.758	0.699
	1.777	1.518	1.413	0.742
	1.579	1.648	2.012	1.284
	1.812	1.344	1.865	1.189
	1.83	1.72	1.968	1.022
	1.683	1.462	1.907	1.185
	1.959	1.612	2.033	1.308
	2.034	1.618	1.881	1.318
	1.767	1.558	1.342	1.711
	1.663	1.624	1.834	1.622
	1.838	1.594	1.959	0.993
	1.79	1.559	1.183	1.606
	1.837	1.676	1.996	1.435
	1.931	1.569	2.026	1.154
	1.921	1.737	2.045	0.703
	1.261	1.711	1.787	1.428
	1.777	1.742	1.989	1.013
	1.842	1.78	1.536	1.039
	1.864	1.524	1.18	0.983
	1.825	1.796	1.402	0.885
	1.604	1.689	1.934	1.074
	1.641	1.715	1.802	1.489
	1.304	1.274	1.692	0.949
	1.648	1.026	1.97	1.165
	1.521	1.129	1.99	1.252
	1.704	1.286	2.044	0.859
	1.615	1.37	2.013	1.082
	1.709	1.506	1.96	0.985
	1.588	1.421	1.236	0.835
	1.68	1.498	1.18	0.955
	1.316	1.369	1.155	0.859
	1.59	1.429	1.975	1.45
	1.57	1.422	1.942	0.945
	0.999	1.486	2.136	0.976
	1.701	1.399	2.092	1.493
	1.559	1.682	1.02	0.983
	1.689	1.576	1.873	1.139
	1.693	1.608	1.366	1.226
	1.734	1.539	1.875	1.725
	1.661	1.636	1.833	1.596
	1.561	1.557	1.895	0.849
	1.595	1.587	1.402	1.515
	1.33	1.596	1.951	1.135
	1.593	1.711	1.768	1.113
	1.36	1.783	1.808	1.448
	1.471	1.603	1.824	1.127
	1.617	1.463	1.914	1.793
	1.664	1.461	1.857	1.834
	1.665	1.663	1.876	1.325
	1.378	1.598	1.318	0.796
	1.581	1.656	1.67	1.23
	1.461	1.74	0.944	1.246
	1.598	1.485	1.869	0.952
	1.568	1.537	1.836	1.231
	1.629	1.549	2.022	1.295
	1.593	1.272	2.035	1.509
	1.605	1.066	1.906	1.358
	1.544	1.363	1.874	1.882
	1.579	1.399	1.385	1.22
	1.654	1.315	1.789	1.228
	1.576	1.344	1.9	1.965
	0.954	1.344	1.847	1.619
	1.655	1.395	1.844	1.461
	0.971	1.447	1.182	1.461
	2.195	1.32	1.863	1.237
	1.292	1.405	1.998	1.081
	1.864	1.491	2.021	1.847
	1.9	1.551	2.054	1.086
	1.958	1.559	2.22	1.25
	1.883	1.616	1.123	1.295
	1.83	1.745	1.843	1.101
	1.846	1.382	2.027	1.197
	1.979	1.54	1.232	1.199
	1.84	1.607	1.582	1.584
	1.923	1.425	2.013	1.32
	1.695	1.61	1.858	1.842
	1.674	1.372	2.003	0.929
	1.374	1.679	1.312	1.991
	2.004	1.62	1.413	1.034
	2.014	1.387	1.964	1.622
	1.836	1.507	1.935	0.977
	1.826	1.473	2.024	1.233
	1.825		1.997	1.308
	1.915		2.012	1.101
	1.914		1.84	1.425
	1.853		1.812	1.562
	1.875		2.057	1.177
	1.85		1.99	0.891
	1.822		1.839	1.451
	1.99		1.879	1.729
	1.8		2.061	1.007
	1.822		2.043	1.558
	1.735		1.982	1.507
	1.733		1.909	1.257
	1.948		1.9	1.063
	1.919		1.905	1.167
	1.942		1.925	1.653
	1.869		1.906	1.654
	1.784			1.086
	1.813			1.07
	1.912			1.16
	1.883			1.074
	1.902			1.224
	1.818			1.046
	1.784			1.289
	2.007			1.183
	1.827			1.782
	1.431			1.424
	1.716			1.769
	1.479			1.143
	1.944			1.55
	2.033			1.063
	1.922			1.179
	1.924			1.366
	2.004			1.416
	1.774			1.341
	1.869			1.313
	1.955			1.336
	2.054			1.626
	2.02			1.021
	1.989			1.097
	1.143			1.614
	1.884			1.628
	1.786			1.538
	1.823			1.108
	1.923			1.289
	1.917			1.354
	1.97			1.268
	1.911			1.273
	1.903			1.379
	1.907			1.745
	1.907			1.262
	2.033			1.909
	2.037			1.783
	2.093			1.671
	1.047			1.073
	1.995			1.197
	1.931			1.376
				1.292
				1.458
				1.303
				1.281
