# Supplementary material for: High and stable ATP levels prevent aberrant intracellular protein aggregation in yeast
Source: eLife. 2022 Apr 19;11:e67659. doi: 10.7554/eLife.67659 (PMC9018071; doi:10.7554/eLife.67659)
Supplement: Figure 1—figure supplement 3—source data 1. [file elife-67659-fig1-figsupp3-data1.xlsx]

## Sheet: fig1-supp3A
	[ADP] (µM/OD)
	wt	snf1	adk1	snf1adk1	bas1
	4.18066	2.85974	1.67007	2.03989	1.3603
	3.85159	3.54606	1.34233	1.70317	0.940455
	3.64997	3.4125	2.14232	4.39668	1.9053
	3.28803	2.97853	2.43981	4.88581	1.82318
mean	3.74256	3.19921	1.89863	3.25639	1.50731
SD	0.373716	0.331531	0.48784	1.61737	0.447626
p-value vs. wt (Dunnett test)		0.40639	0.0096	0.44974	0.00267

## Sheet: fig1-supp3B
	relative ATP level
	glucose	2DG
	1	0.0302788
	1	-0.000445713
	1	-0.0392093
	1	0.0244141
mean	1	0.00375948
SD	0	0.0315905

## Sheet: fig1-supp3C
	ATP/ADP ratio
	wt	snf1	adk1	snf1adk1	bas1
	3.84701	4.82015	6.03662	6.40938	5.22729
	4.17739	4.74126	7.13757	7.92189	6.60496
	4.94642	4.85835	6.03836	3.96832	4.93457
	4.57769	4.47142	6.57546	2.77428	4.9231
mean	4.38713	4.7228	6.447	5.26847	5.42248
SD	0.477783	0.174533	0.525604	2.32764	0.800792
p-value vs. wt (Dunnett test)		0.6241	0.0358	0.3483	0.2764

## Sheet: fig1-supp3D
	[ATP+ADP] (µM/OD)
	wt	snf1	adk1	snf1adk1	bas1
	20.2637	16.6441	11.7517	15.1144	8.47097
	19.9412	20.3589	10.9233	15.1955	7.15212
	21.7043	19.9916	15.0784	21.8441	11.3071
	18.3396	16.2968	18.4827	18.4404	10.7989
mean	20.0622	18.3229	14.059	17.6486	9.43227
SD	1.3807	2.1489	3.45275	3.19736	1.95839
p-value vs. wt (Dunnett test)		0.398	0.0077	0.2542	<0.001
