# Supplementary material for: High and stable ATP levels prevent aberrant intracellular protein aggregation in yeast
Source: eLife. 2022 Apr 19;11:e67659. doi: 10.7554/eLife.67659 (PMC9018071; doi:10.7554/eLife.67659)
Supplement: Figure 1—figure supplement 4—source data 1. [file elife-67659-fig1-figsupp4-data1.xlsx]

## Sheet: fig1-supp4B
wt	snf1	bas1	bas1snf1
2.11	1.221	0.923	1.394		strain	average	SD	N	cv	p-value vs. wt (Dunnett test)	p-value vs. bas1 (Dunnett test)
2.286	1.386	0.999	1.528		wt	2.16187	0.185718	213	0.085906		<0.0001
2.162	1.777	1.13	1		snf1	1.55411	0.310061	166	0.19951	<0.0001	<0.0001
2.196	1.169	1.181	1.337		bas1	1.18191	0.220157	182	0.186272	<0.0001
2.255	1.568	1.518	1.243		bas1snf1	1.22009	0.203713	200	0.166965	<0.0001	0.3147
2.028	1.611	1.438	0.962
2.094	1.696	1.005	0.947
2.011	0.883	1.351	1.732
1.92	0.919	1.519	1.08
2.142	1.689	0.935	1.051
2.149	1.794	1.522	1.344
2.196	1.619	1.23	1.35
2.081	1.614	1.249	1.452
2.014	1.096	1.419	1.176
2.078	0.892	1.358	1.239
1.913	1.647	1.266	1.25
2.292	1.645	0.991	0.928
2.201	1.256	1.229	1.383
2.131	1.557	0.755	1.282
2.307	1.781	1.118	1.463
2.339	1.181	0.957	0.938
2.262	1.239	1.157	1.107
2.199	1.696	1.121	1.44
2.208	1.359	1.738	1.405
2.188	1.789	1.382	1.188
2.177	0.848	1.434	1.515
2.214	1.782	0.995	1.372
2.249	1.827	1.102	1.077
2.265	1.673	1.097	1.262
2.276	1.756	1.249	1.353
2.303	1.784	1.112	1.376
2.356	1.852	1.106	1.251
2.429	1.75	1.436	1.115
1.458	1.822	1.233	1.555
2.193	1.546	1.193	1.214
2.227	1.866	1.204	1.49
2.107	0.836	1.391	0.91
2.119	1.866	1.243	1.446
2.14	1.583	1.251	1.324
2.136	1.861	0.868	1.019
2.197	1.863	0.909	1.064
2.051	2.022	1.257	0.962
2.159	1.775	1.527	1.416
2.21	1.817	1.217	1.425
2.233	1.818	1.142	0.969
2.105	1.855	1.572	1.17
2.144	1.812	1.154	0.756
2.168	1.867	1.16	1.587
2.135	2.065	1.142	1.198
2.09	1.873	1.137	1.454
2.243	1.942	1.549	0.84
2.218	1.091	1.326	0.971
2.074	1.894	1.264	1.092
2.186	1.745	1.181	0.934
2.209	0.96	1.109	0.991
2.428	0.987	1.233	1.3
2.374	1.44	0.832	1.16
2.182	1.428	0.994	1.308
2.254	1.021	0.877	1.146
2.312	1.384	0.919	1.092
2.16	1.319	0.894	1.106
1.368	1.407	1.2	1.384
2.168	1.497	1.352	1.356
2.167	1.537	1.296	1.033
2.334	1.512	1.585	0.95
2.308	1.488	1.585	1.185
2.295	1.001	1.409	0.907
2.265	1.464	1.075	1.385
2.29	0.994	1.192	1.368
2.293	1.462	1.184	1.249
2.234	1.648	1.051	1.333
2.211	1.85	1.312	1.122
2.271	1.018	1.155	1.086
2.283	1.55	0.954	1.097
2.224	1.362	1.419	1.221
2.318	1.007	1.215	1.249
2.203	1.709	1.015	1.051
2.34	1.786	1.515	1.176
2.196	1.8	1.202	1.459
2.295	1.706	1.35	1.318
2.303	1.665	1.235	1.315
2.177	1.852	1.189	1.281
2.368	0.963	1.244	0.767
2.307	1.057	1.801	1.251
2.27	1.191	1.259	0.827
2.189	1.744	1.257	1.192
2.093	1.8	1.218	1.096
2.1	1.734	1.335	1.043
1.991	1.854	1.25	0.982
2.026	1.826	1.072	1.39
2.063	1.198	1.112	1.483
2.197	1.785	1.397	0.866
2.297	1.824	1.337	1.033
2.035	1.75	1.331	1.068
2.213	1.957	0.965	1.262
2.214	1.8	1.131	1.208
1.968	1.737	1.097	1.238
2.061	1.573	1.098	1.199
2.084	1.647	1.003	1.027
2.06	1.613	0.716	1.092
2.091	1.721	0.94	1.134
2.355	1.613	1.562	1.213
2.172	1.047	0.921	1.296
2.13	1.831	1.298	1.21
2.178	1.776	1.006	1.228
2.138	0.91	1.199	1.195
1.355	1.636	1.01	1.14
2.153	1.684	0.798	1.298
2.169	1.63	1.366	1.366
2.041	1.838	1.671	1.302
2.113	1.689	0.886	1.018
2.165	1.862	0.942	1.36
2.022	1.356	1.194	1.332
2.085	1.729	1.264	1.135
2.113	1.784	0.86	1.095
2.161	1.138	1.114	0.733
2.169	1.601	0.779	1.307
2.187	1.075	0.987	1.252
2.162	1.889	1.148	1.316
2.149	1.764	1.089	1.373
2.203	1.857	1.382	1.225
2.238	1.619	0.951	1.024
2.15	1.597	1.529	1.803
2.114	1.676	1.082	0.864
2.125	1.75	1.112	0.977
2.046	1.663	0.855	0.987
2.205	1.766	0.989	0.974
2.286	1.823	1.079	0.897
2.216	1.467	1.06	1.018
2.132	1.075	1.083	1.214
2.352	1.695	1.259	1.259
2.308	1.17	1.39	1.342
2.239	1.617	1.147	1.266
2.18	1.122	1.392	1.257
2.245	1.772	0.894	1.25
2.113	0.96	1.134	1.317
2.105	1.681	0.963	1.348
2.019	1.605	1.324	1.063
2.154	1.61	0.621	1.231
2.149	1.671	1.396	1.522
2.16	1.685	0.695	1.397
2.231	0.839	1.161	1.055
2.194	1.685	0.924	1.497
2.127	1.76	0.862	1.55
2.061	1.038	0.917	0.981
2.21	1.87	1.565	0.895
2.201	1.602	1.337	1.045
2.201	1.737	1.244	0.941
2.288	1	0.989	1.386
2.113	1.589	1.302	1.597
2.288	1.568	0.867	1.275
2.187	1.685	0.971	1.551
2.285	1.598	0.83	1.114
2.093	1.139	1.611	1.104
2.2	1.929	1.171	1.457
2.303	1.654	1.547	1.254
2.095	1.739	0.971	1.639
2.156	1.857	1.206	1.596
2.429	1.714	1.142	1.398
2.198	0.896	1.596	1.164
2.176	1.829	1.068	1.171
2.212	1.7	1.066	1.19
1.873	1.73	1.275	1.325
2.369	1.773	1.283	1.444
2.14	1.489	0.728	1.666
2.201	1.026	0.992	1.201
2.233		1.612	1.187
2.254		1.252	1.454
2.312		1.147	1.694
2.207		1.316	1.404
2.198		1.358	1.508
2.366		1.543	1.611
2.349		1.129	1.429
2.231		1.117	1.268
2.303		1.175	1.042
2.277		1.263	1.175
2.372		1.013	1.445
2.35		1.362	1.075
2.16		1.298	1.116
2.307		1.071	1.19
2.223		1.221	1.341
1.497		1.321	0.939
2.186			1.255
2.338			1.294
2.111			1.003
2.252			1.211
2.267			1.287
2.144			1.18
2.111			1.221
2.367			1.207
2.294			1.329
1.737			1.13
2.298			1.041
2.173			1.654
2.249			0.976
1.739			0.959
1.779			1.331
1.262			1.034
1.302			0.997
2.258			1.01
2.292
2.261
2.348
2.116
2.122
2.168
1.257
2.173
2.085
2.16
2.217
2.249
2.225
