# Supplementary material for: High and stable ATP levels prevent aberrant intracellular protein aggregation in yeast
Source: eLife. 2022 Apr 19;11:e67659. doi: 10.7554/eLife.67659 (PMC9018071; doi:10.7554/eLife.67659)
Supplement: Figure 1—source data 1. [file elife-67659-fig1-data1.xlsx]

## Sheet: fig1B
[ATP] mM
wt	snf1	adk1	snf1adk1		strain	n	mean	SD	CV	p-value vs. wt (Dunnett test)
3.57349	2.11285	4.24551	2.68301		wt	134	4.49333	0.48224	0.107324
3.55508	3.82767	1.85316	1.85316		snf1∆	168	3.3996	0.75696	0.222661	<0.0001
4.39012	2.05818	2.44243	2.0419		adk1∆	146	2.77616	0.675576	0.243349	<0.0001
4.18142	3.29074	1.48965	2.42484		adk1∆snf1∆	276	2.43725	0.686949	0.281854	<0.0001
4.44852	1.48719	2.72941	2.39857
3.88662	2.29198	1.98532	2.50152
4.16871	3.13008	2.53132	2.12937
4.30624	3.17061	2.45419	2.77309
4.28011	1.88719	2.82349	2.54329
3.98264	3.80819	3.24577	2.78879
4.08915	3.96246	2.48372	2.69225
4.00698	2.18205	3.35018	2.78879
4.38121	2.74808	3.21488	2.66456
4.31937	4.11411	2.14042	2.50449
4.57721	1.67868	3.55876	2.65537
4.32815	2.20721	3.6629	2.05818
4.11411	4.49859	3.22859	2.69225
4.41248	2.61571	2.96144	2.0419
4.31062	3.79267	2.84569	2.22967
4.62891	3.46051	2.54029	1.91352
4.29751	4.03556	3.23202	2.50152
4.54929	3.9504	3.13008	2.47484
4.65739	3.64038	2.85524	2.4778
4.34576	3.75411	2.87118	3.02031
4.38566	4.07672	2.61267	2.7637
4.4712	4.01513	2.48668	1.10631
4.52617	4.56323	3.80819	1.72178
4.60063	2.71389	3.69689	3.42821
4.12247	2.54629	1.90297	2.82349
3.89454	3.17739	1.90297	-0.118661
4.1899	3.47132	2.90967	2.59751
5.03667	3.85901	1.80383	0.697913
4.24982	1.94265	1.23473	2.13765
4.79794	3.59197	1.78835	2.30911
4.10161	3.10325	1.79608	1.97997
3.59197	3.36427	3.25957	1.45536
4.67649	3.73113	2.14595	1.72942
4.60063	3.23202	1.79608	2.04461
4.25413	2.37533	3.32212	2.45419
4.54465	4.52617	3.50392	1.01563
4.2671	2.36086	3.12	1.32415
4.68607	4.09745	3.01045	2.75745
4.63364	3.42107	3.50392	2.73874
4.55393	3.14693	2.90323	2.48076
4.71013	1.34835	2.98425	2.22124
4.89276	3.44972	2.94844	3.02031
4.91808	3.9948	3.00389	2.40439
4.86759	2.15703	2.55529	3.05332
5.19675	3.0467	2.51938	0.953486
5.021	3.61053	3.07656	2.76057
5.26259	3.46772	1.58597	2.36664
5.15344	4.03147	1.55867	2.77309
4.97952	3.89454	3.18419	2.71699
4.66215	1.92674	1.72687	3.0269
4.07672	2.1156	3.05332	2.36086
4.4712	3.93036	2.55829	3.12336
4.41697	3.72732	2.04461	3.08322
4.67649	3.70827	2.73874	1.87146
4.085	4.62418	3.0467	2.85842
5.18046	4.64787	3.89058	0.768132
3.91839	3.33964	2.9712	2.5613
3.9786	3.93837	2.80769	2.47484
4.00698	4.3546	3.51119	0.851922
4.39458	3.16383	3.21146	2.34931
4.42146	3.42821	2.6615	2.5164
4.45758	2.23249	3.67797	3.24577
5.31267	3.94638	3.00061	2.46598
4.81772	3.22516	1.7832	2.01488
4.52156	3.1066	3.55508	2.55829
4.27143	3.22173	1.63591	2.85524
5.02622	3.53674	1.809	2.53431
4.71979	2.59448	3.41037	2.97446
4.95381	3.33964	2.24094	1.31931
4.97952	3.64038	3.45691	2.98425
4.27577	3.40325	2.69225	3.34315
4.2888	2.24094	2.22124	2.36664
4.87764	3.65538	3.49303	2.49558
4.60063	2.04461	2.29769	2.31484
4.91301	3.71969	2.88398	1.7524
2.22967	4.02738	1.28063	1.51669
4.90287	4.05609	1.96128	3.4894
3.81987	3.73878	3.46411	1.47004
3.86294	3.44254	4.01105	3.08989
5.10527	3.55141	3.14355	2.78251
4.81277	3.34666	2.66763	2.81084
4.02738	3.60681	1.95595	2.66763
4.3546	2.29198	2.84251	2.76057
3.77335	3.95843	2.99734	1.46025
4.41248	3.51848	1.98532	2.87118
4.87261	3.25611	3.15706	2.57937
3.90645	3.65538	2.85205	2.67993
4.10994	3.39259	2.7637	3.07656
4.40352	2.98099	2.42484	2.97772
4.47575	4.22404	3.22516	0.564793
2.89681	3.90248	3.21831	1.23715
4.66215	3.44972	2.88078	2.7263
5.21858	2.07179	3.07656	2.84569
5.2959	3.17061	2.74808	3.35722
4.88267	3.59197	3.28033	3.07323
4.80288	2.99734	2.36954	2.82982
4.70049	3.74644	1.59842	2.61571
4.43046	3.47493	1.90297	1.96394
5.0158	3.46772	3.89058	4.32815
3.75411	3.77335	3.09656	2.12661
4.39905	3.29074	2.01488	2.17092
3.9786	4.30188	1.72432	1.61339
4.87764	4.05609	2.23812	2.00949
4.54929	4.25413	1.89508	1.28788
4.52617	3.17739	1.49456	2.56731
4.31062	4.20267	2.91933	3.39259
4.81277	3.86294	2.91611	2.67685
4.90287	4.03556	2.19042	3.05001
4.15605	4.03966	3.03349	3.02361
4.43497	3.81597	1.50193	2.77937
5.22954	1.79866	3.84723	2.82665
5.84323	4.04376	2.08271	2.43363
4.92317	4.16449	2.59145	3.01045
3.78107	4.48487	3.05001	3.10995
4.85256	4.25413	2.09639	2.90323
4.98468	2.3378	3.25611	3.0434
4.14342	2.78565	3.88267	3.76564
4.47575	3.56612	3.30118	3.4175
4.71013	3.4068	3.05664	3.37134
4.0933	3.43179	2.93872	3.58457
4.56788	3.24577	3.09656	2.21562
4.54465	3.82377	2.43363	2.60963
4.89781	3.54407	3.86688	3.01374
5.21311	3.80043	3.46411	2.30911
4.82268	3.89851	3.32912	1.65097
4.53078	3.95843	4.03966	2.72941
4.86257	3.32912	2.52236	2.34931
4.77826	2.00142	3.68553	2.14318
4.83262	3.92637	2.69843	3.05664
5.05765	3.02031	2.1101	1.6059
	3.6031	1.78835	2.75432
	3.70448	2.78565	2.45419
	3.97456	3.51119	2.21281
	4.7053	3.98669	2.62483
	4.51236	2.91933	3.13681
	4.14342	2.78565	3.33613
	3.71969	3.36427	2.52833
	4.3546	3.37134	2.70152
	4.18566	3.35018	3.7235
	2.69534	3.42821	2.38984
	3.98264	2.93872	2.39566
	4.04787	2.83616	2.75745
	3.89058		2.80769
	3.95441		3.03349
	2.63092		2.01757
	2.00949		2.6707
	3.45331		2.48668
	2.82982		2.66456
	3.10325		2.01488
	1.70907		2.99734
	3.21146		3.01045
	2.5643		2.45419
	1.63842		1.87146
	3.15368		0.080494
	4.53078		2.46303
	3.4175		1.89245
	2.1598		2.29769
	4.02329		1.89245
	3.62543		2.57635
	3.49303		1.82195
	3.96246		1.20815
	4.41697		1.72942
	4.10161		2.52833
	4.23691		2.79508
			3.6931
			1.69132
			2.5164
			2.78565
			2.39275
			2.55529
			3.77721
			1.04027
			2.43363
			2.49855
			2.74185
			1.82195
			2.65843
			2.07998
			2.4778
			2.40148
			1.14035
			2.95818
			2.82665
			3.26648
			2.7077
			2.86161
			0.57939
			2.44243
			2.74185
			2.75745
			2.99079
			1.81159
			0.935922
			1.69639
			1.33141
			2.1211
			2.97446
			2.92256
			1.71669
			2.8648
			2.77623
			3.55141
			2.6066
			3.22516
			1.04273
			3.1066
			3.13008
			3.95441
			2.12661
			2.9452
			2.67685
			2.96144
			3.44613
			2.77309
			2.46893
			2.32057
			2.16814
			2.35508
			1.19364
			3.23889
			3.20805
			2.55529
			2.79193
			2.83616
			2.82665
			1.22507
			2.8936
			2.64008
			2.98752
			1.10631
			1.47249
			1.3532
			2.8936
			2.7637
			2.75432
			2.8936
			2.70461
			2.67685
			2.3177
			2.1598
			2.22405
			1.04764
			2.48372
			1.99068
			2.54928
			2.2579
			1.33625
			2.39857
			1.64093
			1.69639
			2.3034
			2.4307
			2.7637
			2.5164
			2.85524
			2.97446
			1.43339
			2.63397
			2.91611
			2.33492
			2.55529
			2.72941
			2.74185
			2.71389
			3.01702
			1.89245
			0.299637
			2.40148
			2.5164
			3.13681
			2.83299
			3.12

## Sheet: fig1C
	[ATP] (µM/OD)
	wt	snf1	adk1	snf1adk1
	16.0831	13.7844	10.0816	13.0745
	16.0896	16.8128	9.58097	13.4923
	18.0543	16.5791	12.9361	17.4474
	15.0516	13.3182	16.0428	13.5546
mean	16.3196	15.1236	12.1604	14.3922
SD	1.25511	1.828	2.98049	2.04794
p-value vs. wt (Dunnett test)		0.4166	0.0217	0.2355

## Sheet: fig1E
[ATP] mM
glucose	glucose	glucose+ adenine	glucose+ adenine
wt	bas1	wt	bas1			strain	condition	n	mean	SD	cv	p-value vs. wt in glucose (Dunnett test)	p-value vs. bas1 in glucose (Welch t-test)
2.86161	3.83548	1.07948	3.26302			wt	glucose	244	3.10886	0.440445	0.141674
4.1899	3.52578	1.00574	1.63842			bas1	glucose	296	1.39585	0.571153	0.409179	<0.0001
3.5698	3.17061	1.01069	0.320017			wt	glucose+adenine	186	3.37356	0.353534	0.104796	<0.0001
3.32562	3.33613	1.53888	2.12661			bas1	glucose+adenine	214	2.10588	0.947679	0.450015	<0.0001	3.56554e-20
3.28727	3.56243	1.39201	2.64619
2.99406	3.45691	1.57355	1.69639
3.43537	3.67797	1.29513	3.06327
3.43537	3.6031	0.49307	2.77309
3.4068	3.64413	0.953486	2.82349
3.00717	3.84331	1.03781	3.34666
3.42107	3.7888	1.02057	3.23202
3.41393	3.46051	1.44559	2.05003
3.08655	3.52213	1.31689	2.73251
3.3537	3.57718	0.877605	3.09323
3.27686	3.75411	1.4212	0.517294
3.13681	3.76564	1.25648	0.63387
3.36075	4.14763	1.04518	2.36664
3.84331	4.16871	1.53641	3.27686
3.36075	4.12665	1.72178	0.89546
3.36075	3.86294	0.499157	2.96469
3.60681	3.53308	1.16944	2.21281
3.62543	3.58087	1.92939	0.950982
3.1944	3.36075	0.608253	3.46051
3.73878	3.46051	0.869923	1.80383
3.67797	4.18142	0.820804	3.07656
3.50392	3.4894	1.17186	1.78835
3.21488	3.97456	1.05745	1.46514
3.43895	4.16449	2.814	2.83299
3.2838	3.65914	1.40174	1.64846
3.69689	3.31862	1.37987	3.29074
3.67043	3.42821	0.619679	3.26302
3.4894	3.65163	1.76521	2.94196
3.45331	3.57718	0.815583	0.686914
3.14693	3.18759	2.1156	3.01702
3.08989	3.96649	0.164309	3.09991
3.07323	3.18419	1.42364	2.91611
3.56612	3.44254	1.43583	3.08322
3.06991	3.23202	1.0648	2.93225
3.5404	3.26994	1.14278	2.61875
3.23202	3.80043	1.82454	1.14278
3.71208	3.68553	0.910688	1.29513
3.09323	3.59939	3.07323	3.42821
3.59197	4.04787	0.915749	2.96469
3.06991	4.10994	0.558922	2.82665
3.2734	3.89058	1.24923	2.76057
3.44254	3.85901	1.42364	2.98099
3.18759	3.70827	1.61089	3.10325
4.03147	4.16871	3.03349	1.36047
3.48578	3.70448	0.85965	2.63397
3.20805	3.6742	2.13489	1.04027
3.16044	4.01105	1.0255	0.89546
3.43179	3.06659	0.920803	3.33262
3.07989	3.55141	0.818195	1.46759
3.30466	3.80819	1.48965	3.17739
3.33262	3.6629	1.0181	3.0467
3.49303	3.1066	0.789329	3.64038
3.44254	3.75795	0.749433	2.96794
3.03349	3.64413	1.70146	1.0648
3.20805	3.33964	0.179095	0.995835
3.38904	3.24233	0.913219	1.00079
3.35018	3.51483	0.938436	1.03535
3.70827	3.54774	1.17913	2.9452
3.2734	3.3537	1.54383	3.13681
2.70461	3.85901	1.23232	3.19781
2.42191	3.12672	1.52654	1.41633
2.31197	2.96794	1.47739	0.653571
2.39275	3.33262	1.6309	1.33867
1.24923	3.37841	1.33867	2.98099
2.44537	3.53674	1.32657	2.5373
2.48964	3.91043	0.431009	2.86161
2.27491	3.20463	1.56859	0.773448
2.54029	3.19099	1.099	0.945968
2.40439	2.77937	1.76008	0.708857
2.59448	3.41393	1.61089	2.4778
2.46008	3.66666	1.69639	0.553032
2.40439	3.59197	0.880162	1.14278
2.36954	3.44254	1.31447	1.51915
2.51044	3.24577	1.59095	1.24923
2.29769	3.43179	1.45292	0.564793
2.46303	2.65231	0.529285	0.625368
2.2579	3.68175	2.1101	2.95494
2.6707	3.64038	1.33867	2.44243
2.39857	2.99079	2.85524	0.877605
2.3522	3.08655	2.70461	2.38403
2.30054	3.03019	0.511269	3.3678
2.39857	2.87758	0.56186	2.74497
2.37243	1.96394	0.749433	0.983421
2.52534	2.77309	1.32899	2.87438
2.4307	2.85205	0.719748	2.90967
2.63702	3.23889	1.1646	0.616829
2.63397	3.08989	1.13064	2.8648
2.42777	2.94196	1.14278	3.09991
2.38984	3.1503	1.04273	3.09323
2.47189	3.31862	0.96848	2.6066
2.40731	3.14693	1.26614	0.254593
2.36086	2.83616	0.71703	1.61339
3.21831	3.39969	0.826014	0.953486
3.2977	2.78879	2.19881	1.23957
2.92256	3.05332	1.60839	0.57939
2.61267	3.2977	1.33867	1.85055
2.84569	3.67797	1.19123	2.65231
3.21488	3.44613	0.953486	3.12336
2.63702	3.24233	0.882716	2.69225
3.22516	3.04009	1.31447	1.46514
2.96144	3.00389	0.703392	3.01045
2.98752	2.99734	2.41607	2.64313
3.20122	4.29315	0.791966	2.47484
2.93872	3.17739	1.52654	2.94196
2.83934	3.59939	1.50439	2.70461
3.24577	2.91289	1.18639	3.06991
2.99734	3.30466	1.19364	2.71699
3.174	3.45331	0.802489	2.65843
3.70827	3.16383	0.722463	1.26372
3.57349	3.07323	0.930889	1.20574
3.07323	2.77309	1.15975	2.67378
3.64413	3.20122	1.0255	2.34931
3.09656	3.1944	2.02837	2.96144
3.22516	3.07656	1.31447	3.01374
3.32912	3.08322	1.17186	1.30238
3.41037	3.23889	0.89546	2.79823
3.16044	3.61425	0.791966	2.61571
3.39614	3.01374	0.82341	1.33867
3.6031	3.67043	0.908154	2.80453
3.48216	3.48578	0.585197	0.69242
3.37841	3.44613	0.890368	2.6066
3.67043	3.12336	0.841587	2.83616
3.47855	3.45331	1.95329	0.695168
3.45331	2.99079	0.664744	0.880162
3.20122	3.33262	0.903082	2.95169
2.8648	2.97446	1.13307	2.57033
2.94844	3.12336	1.29271	3.12
0.59676	3.44613	1.4066	1.25889
2.57033	3.51119	1.30964	3.30118
3.54774	3.68553	1.68879	1.16702
3.13345	3.23889	0.851922	3.0434
3.12336	3.29074	1.19364	2.55228
2.98099	3.01374	1.72432	2.86161
3.37487	3.26302	1.51423	0.781401
3.52578	2.93872	0.943459	0.970974
2.98752	3.09656	1.35077	1.23715
3.41037	3.22859	1.44071	2.34643
2.90002	3.18759	1.00327	2.54629
3.59568	3.05332	1.34593	0.330113
3.43537	2.85205	1.34351	2.33492
3.31164	3.17739	1.37502	1.22507
3.03679	3.39259	1.07704	0.81297
3.21831	3.18759	1.19606	2.33492
3.25267	2.71699	1.92939	1.0599
3.03679	3.5698	1.11848	2.87438
2.8648	2.91611	2.07998	2.78565
2.82665	3.26302	2.19322	2.60053
3.42464	2.77937	2.17927	2.23249
3.1944	3.4068	2.21843	1.45781
3.35018	3.2734	0.82341	0.452984
3.00717	3.26994	1.81677	3.20463
3.06659	3.08655	0.880162	2.98099
3.29074	3.6329	1.30238	3.65163
3.59568	3.52578	2.21562	0.948476
3.73113	3.43179	1.18639	3.03679
3.37841	3.61053	1.01316	1.90297
3.33613	3.48216	1.49701	2.19601
3.31513	3.21488	1.33141	1.89771
3.53308	2.8936	1.42851	2.51342
3.1503	3.38549	1.38473	2.4395
3.3537	3.4068	1.2299	2.91289
3.44972	3.41037	0.642337	2.21281
3.41037	3.79267	0.955989	2.30054
3.42107	2.94196	1.49701	2.58239
3.65163	3.27686	1.35804	2.52236
2.95169	3.31513	1.28788	0.686914
2.77623	2.88718	2.43656	0.980935
2.79193	3.24922	0.908154	2.92579
3.12336	3.12	2.1737	0.970974
3.1503	3.50392	1.10631	0.752113
2.98099	3.28727	1.35804	3.36075
3.15368	3.15368	1.24198	2.51938
3.31164	3.17739	1.46025	2.70152
3.08322	3.01045	0.670308	1.93734
2.90645	3.22516	1.26372	2.99734
2.70152	3.6217	1.14763	0.75479
2.84251	3.2734	0.948476	2.70152
3.17739	3.21488	1.41147	3.02031
3.28727	3.25267	0.272065	3.1066
3.41037	2.94844	1.23715	2.76996
2.87438	3.59939	1.988	0.980935
3.26994	3.37134	1.13064	1.30964
3.06327		1.29997	1.18639
3.31164		2.72009	0.789329
3.37134		0.988391	1.09413
3.39259		0.831214	2.86799
3.39614		1.68121	3.1066
3.49303		1.19123	1.96394
3.20805		1.76521	0.933407
3.05332		1.76265	2.85842
3.33964		3.00061	1.44071
3.20463		1.28788	0.711585
3.62917		2.5373	1.04027
3.26648		1.90825	2.2664
3.0467		2.24941	2.97446
2.73874		2.71699	1.01069
3.3537		1.62089	0.605386
2.72941		1.68374	0.511269
2.86161		1.79608	0.807734
3.01702		1.86622	2.66456
2.79193		1.24923	1.06235
3.1133		1.31205	0.541197
3.23889		0.908154	2.77309
3.34666		0.807734	2.51044
3.21831		1.15975	2.69225
1.31447		0.661956	2.91611
3.08989		0.885269	2.90645
3.58087		2.16814	0.841587
2.96469		1.99337	2.92256
3.22173		0.5233	2.82665
3.13681		1.54877
3.42107		1.39687
3.28033		2.01218
3.50029		1.10388
3.38904		1.53148
2.88718		0.576479
3.51483		1.23715
3.34666		1.14278
2.72941		1.82195
2.64925		1.97195
2.67378		2.42191
2.74497		2.32917
3.03349		1.87146
2.91289		2.08817
3.01374		2.76996
3.27686		2.54029
3.13008		1.88194
2.7637		1.15248
3.04009		1.18639
2.61267		0.930889
3.19781		0.689669
3.32562		0.55598
3.10995		1.39201
3.03679		2.2664
3.38904		1.61839
3.36075		1.14035
3.39969		1.27097
3.29422		0.689669
3.42821		1.36774
3.29074		1.27822
		1.77548
		0.0843985
		1.51915
		1.13307
		1.42364
		1.45536
		1.85577
		1.79608
		0.836405
		1.88456
		1.34593
		1.44559
		2.02567
		2.22686
		2.37823
		2.40148
		0.424679
		1.49701
		1.10631
		2.00949
		1.88719
		1.6309
		1.80125
		1.17671
		2.24094
		2.16814
		1.81936
		1.13064
		1.10144
		0.89546
		1.37259
		1.16217
		1.25889
		1.66103
		2.14595
		1.30722
		1.56115
		1.62839
		2.03107
		2.02297
		1.65097
		2.48076
		1.17428
		2.63397
		1.66355
		1.60091
		0.673085
		1.38473
		2.28629
		2.26073
		2.98425
		2.8936

## Sheet: fig1F
	[ATP] (µM/OD)
	wt	bas1
	16.0831	7.11067
	16.0896	6.21167
	18.0543	9.40183
	15.0516	8.97568
mean	16.3196	7.92496
SD	1.25511	1.51477
p-value vs wt (Welch test)		8.5e-05
