# Supplementary material for: High and stable ATP levels prevent aberrant intracellular protein aggregation in yeast
Source: eLife. 2022 Apr 19;11:e67659. doi: 10.7554/eLife.67659 (PMC9018071; doi:10.7554/eLife.67659)
Supplement: Figure 2—figure supplement 1—source data 1. [file elife-67659-fig2-figsupp1-data1.xlsx]

## Sheet: fig2-supp1
Time (min)	ATP (mM)
0	1.87731
4	2.13648
8	2.19093
12	2.28428
16	2.03837
20	1.75219
24	2.23335
28	2.32105
32	2.18699
36	2.32219
40	2.28339
44	2.39736
48	2.19964
52	2.14666
56	2.17776
60	2.24549
64	2.57055
68	2.43792
72	2.6744
76	2.21932
80	1.78544
84	2.29789
88	2.42401
92	2.17074
96	2.27796
100	2.16183
104	2.12192
108	2.17872
112	1.93108
116	2.22959
120	2.27462
124	2.16862
128	2.24633
132	2.14644
136	1.82867
140	2.10896
144	2.14524
148	2.00161
152	2.10279
156	2.11972
160	2.32805
164	2.19699
168	2.30565
172	2.2207
176	2.29739
180	2.45101
184	2.37812
188	2.23287
192	2.10468
196	2.24318
200	2.21696
204	2.21516
208	2.06031
212	2.11396
216	2.18161
220	2.02141
224	2.03553
228	2.04263
232	1.87731
236	1.74605
240	1.77535
244	1.75739
248	1.22804
252	1.08761
256	0.949952
260	0.829465
264	0.662461
268	0.731895
272	0.693951
276	0.689399
280	0.544006
284	0.653996
288	0.804426
292	0.735186
296	0.686282
300	0.758902
304	0.623288
308	0.636902
312	0.686061
316	0.658743
