# Supplementary material for: High and stable ATP levels prevent aberrant intracellular protein aggregation in yeast
Source: eLife. 2022 Apr 19;11:e67659. doi: 10.7554/eLife.67659 (PMC9018071; doi:10.7554/eLife.67659)
Supplement: Figure 2—figure supplement 2—source data 1. [file elife-67659-fig2-figsupp2-data1.xlsx]

## Sheet: fig2-supp2A
ID	lag	maximum lagged difference						raw data	Time_(Frames)	cell1.1	cell1.2	cell1.3	cell1.4	cell2.1	cell2.2	cell2.3	cell2.4	cell2.5	cell3.1	cell3.2	cell3.3	cell3.4	cell3.5	cell3.6	cell4.1	cell4.2	cell4.3	cell4.4	cell4.5	cell4.6	cell4.7	cell5.1	cell5.2	cell5.3	cell5.4	cell6.1	cell6.2	cell6.3	cell6.4	cell6.5	cell6.6	cell7.1	cell7.2	cell8.1	cell8.2	cell8.3	cell8.4	cell8.5
cell1.1	1	0.251506		lag (frame)	mean	SD			1	2.29712	1.91712	1.94361	2.1405	2.24098	2.20704	2.06995	2.03121	1.85375	2.3027	2.13361	2.0124	1.9997	1.93075	2.0946	2.32462	2.24246	2.05287	1.99494	1.95504	2.13065	1.99485	2.26313	2.13442	2.122	1.94894	2.31497	1.87565	2.03221	2.02815	1.828	1.79601	1.87638	1.97448	2.2989	2.26261	2.11489	2.11383	1.9702
cell1.2	1	0.295637		1	0.288881	0.102544			2	2.27374	2.07847	2.07112	2.12601	2.29142	2.08167	2.05267	2.09639	1.8996	2.19809	2.22079	2.06341	2.05067	1.88882	2.33637	2.21562	2.25617	2.2089	2.0118	1.86589	2.10582	2.06518	2.13838	2.11103	2.096	1.95138	2.42985	1.89016	1.97204	2.12374	1.86098	1.77061	2.03532	2.02581	2.41577	2.26608	2.14113	2.13237	2.0102
cell1.3	1	0.214791		2	0.28647	0.10896			3	2.22404	2.0284	1.96679	1.99531	2.36192	2.29234	2.01644	1.98882	1.98542	2.10546	2.26129	1.9971	2.09303	1.96389	2.41148	2.16623	2.16969	2.21134	2.11251	1.97099	2.16746	1.81542	2.21738	2.14254	2.09	1.93035	2.14465	1.94301	2.03555	2.05246	1.88006	1.74543	1.96457	2.02754	2.37543	2.17236	2.16109	2.23376	2.07519
cell1.4	1	0.232684		3	0.285642	0.111569			4	2.19111	2.08884	2.04347	1.95033	2.31019	2.31504	2.17633	2.01059	1.93083	2.16529	2.3233	2.14855	1.9333	1.81462	2.20468	2.15295	2.22583	2.15335	2.1478	2.03189	2.09146	1.90314	2.41839	2.18142	2.072	2.05802	2.31666	1.8781	1.93906	2.12473	1.9339	1.80919	1.89382	2.02927	2.27173	2.32799	2.15877	2.25026	2.12937
cell2.1	1	0.278826		4	0.295639	0.0862986			5	2.15818	1.95882	1.89751	1.97101	2.27052	2.25574	2.12125	1.98416	1.97351	2.05177	2.09253	2.14318	2.31076	2.03753	2.30703	2.29017	2.16581	2.13817	2.22579	2.10531	2.16609	1.99412	2.22761	2.15638	2.027	2.00484	2.23676	1.9844	1.94628	1.98575	1.94036	1.78945	2.2159	2.1356	2.21122	2.2359	2.15114	2.10789	2.09856
cell2.2	1	0.31412		5	0.299791	0.0953902			6	2.16554	2.1072	2.08835	2.09532	2.35834	2.27782	2.12478	2.10268	1.8242	2.22479	2.27531	2.18222	2.1919	1.97893	2.17008	1.99609	2.00766	2.01251	2.15657	2.08654	2.19398	1.96092	2.23057	2.16341	2.147	1.97519	2.1869	1.9451	1.87459	2.15302	1.94683	1.86279	1.95624	2.02102	2.3565	2.18294	2.26393	2.18944	2.11298
cell2.3	1	0.272785							7	2.13499	2.11016	2.10378	2.01306	2.38325	2.2432	2.07553	2.03964	2.00463	2.28105	2.37321	2.08414	2.17149	1.89831	2.2124	2.23915	2.26598	2.19393	2.051	2.03285	2.19378	1.98547	2.21744	1.95297	1.995	1.9477	2.33728	1.9059	1.97402	2.04467	1.93584	1.74839	2.04746	2.07937	2.2497	2.17879	2.21089	2.15626	1.93299
cell2.4	1	0.274015							8	2.10444	2.07911	2.04295	1.94882	2.37884	2.20526	2.01483	2.07672	1.99475	2.23142	2.22035	2.24843	2.10411	1.98622	2.14316	2.19079	2.19324	2.18702	2.07323	2.01781	2.1863	1.99385	2.28179	2.08002	1.99	2.04588	2.31946	2.00399	1.96902	2.09745	1.92914	1.80378	2.11386	2.23032	2.39148	2.34199	2.16174	2.18402	2.07456
cell2.5	1	0.296602							9	2.25835	2.0592	2.10157	1.95722	2.34256	2.16688	2.09082	2.05889	2.13975	2.28468	2.23037	2.2809	2.31577	2.03583	2.16478	2.26631	2.27307	2.26654	2.12094	1.99279	2.15417	1.87813	2.25598	2.05869	1.794	1.94291	2.36692	2.00783	1.98514	2.02523	1.93029	1.87983	2.10241	2.06755	2.04915	2.13124	1.969	2.0413	1.901
cell3.1	1	0.276194							10	2.22837	1.91023	2.11293	2.01309	2.31722	2.15219	2.13082	2.10996	2.03657	2.2608	2.36725	2.26033	2.01562	1.9379	1.9769	2.23063	2.29444	2.25682	2.12607	1.95659	2.19077	1.95045	2.23755	2.072	1.979	2.11563	2.28622	1.983	1.97709	2.09987	1.87843	1.89853	2.15998	2.23776	2.39377	2.23528	2.106	2.19269	2.002
cell3.2	1	0.286012							11	2.20235	2.10445	2.04728	1.89	2.39617	2.17771	2.03278	2.01131	2.05686	2.36578	2.32748	2.34483	2.14495	1.98457	2.26046	2.33609	2.33985	2.16852	2.07933	1.88701	2.16793	1.9899	2.27021	2.07409	2.065	1.98803	2.32128	1.99868	1.83394	2.03662	1.86219	1.76231	2.07381	2.13808	2.39397	2.34484	2.195	2.2677	2.022
cell3.3	1	0.264371							12	2.09986	2.00412	2.02841	1.98007	2.4118	2.05555	1.97034	2.16114	1.94414	2.08958	2.38188	2.29791	2.2099	1.98936	2.14348	2.14248	2.20855	2.0353	2.15088	2.0211	2.21849	2.00314	2.20399	2.11176	2.102	1.9482	2.36104	2.0046	2.02019	2.02535	1.83054	1.83692	2.08603	2.21884	2.32516	2.18422	2.194	2.19966	2.041
cell3.4	1	0.377465							13	2.23068	1.96188	2.09628	1.8874	2.55622	2.18764	2.11861	2.1468	2.06599	2.33138	2.11834	2.03354	2.20499	1.98542	2.19985	2.21731	2.21225	2.10167	2.20128	2.02743	2.17816	1.97457	2.30236	2.04972	2.113	2.06764	2.18809	1.95121	1.86105	2.01408	1.87756	1.76118	2.05741	2.2147	2.11463	2.36614	2.102	2.15476	2.041
cell3.5	1	0.261359							14	2.0188	1.8117	2.08437	1.94329	2.44277	2.28285	2.15214	2.12825	1.85291	2.0691	2.24098	2.16407	2.18793	2.02061	1.38915	2.26891	2.45798	2.09445	2.16455	1.98809	2.23594	1.96266	2.32425	2.10291	2.046	1.98749	2.36521	1.89782	1.86365	2.04012	1.84354	1.78541	2.2141	2.19513	2.38236	2.3431	2.13	2.20035	2.018
cell3.6	1	0.8107							15	2.01521	1.87704	2.05447	1.85003	2.41572	2.18654	2.19072	2.19213	1.87736	2.24512	2.2058	2.26535	2.13452	2.07851	1.96609	2.20716	2.44073	2.14813	1.97351	1.90096	2.18596	1.87598	2.34613	2.11766	2.13	1.9702	2.29983	1.98587	1.90927	2.07009	1.85651	1.75065	2.29649	2.24478	2.11357	2.22849	2.066	2.23171	2.156
cell4.1	1	0.294079							16	2.13064	2.04134	2.07087	1.83185	2.45275	2.34726	2.09811	2.07485	1.96575	2.22554	2.10317	2.0943	2.06082	2.01462	2.25313	2.18105	2.20924	2.11308	2.06374	2.009	1.83119	1.8773	2.35762	2.09117	2.056	1.96329	2.35192	1.92293	1.96253	1.91879	1.77394	1.75224	2.17062	2.26455	2.20145	2.31216	2.069	2.1009	2.156
cell4.2	1	0.390897							17	2.2572	2.07179	1.93686	2.06454	2.41516	2.26392	2.12282	2.07748	1.9091	2.26298	2.16691	2.16229	2.1401	1.98963	2.06588	2.23813	2.29203	2.09375	2.09991	2.01602	2.22891	1.72916	2.18533	2.07264	2.063	1.98482	2.27391	1.73888	1.89385	1.99081	1.94308	1.73658	2.33348	2.20002	2.02925	2.15119	2.089	2.20395	1.998
cell4.3	1	0.246795							18	2.23616	2.01909	1.91843	1.96382	2.34791	2.16258	2.24422	2.16217	1.8319	2.16035	2.09946	2.19278	2.1378	2.06407	2.09672	2.18754	2.27989	2.17477	2.0231	2.10209	2.1491	1.98064	2.37813	2.10311	2.199	2.05023	2.30088	1.9317	2.04627	1.98247	1.84203	1.78155	2.09336	2.23429	2.23881	2.28591	2.198	2.15911	2.068
cell4.4	1	0.212424							19	2.20919	2.02323	1.9	1.9187	2.25899	2.19819	1.97143	2.13237	1.94276	2.2917	2.2785	2.33153	2.1048	2.0436	2.0778	2.3085	2.44136	2.25578	1.97102	2.053	2.20315	2.0428	2.41865	2.00612	2.156	2.01319	2.29448	1.96755	1.9105	1.9091	1.8519	1.67981	2.23841	2.26159	2.18801	2.21598	2.028	2.18002	2.065
cell4.5	1	0.298436							20	2.23634	2.10034	1.83698	1.93097	2.32429	2.21318	2.16757	2.2119	1.80601	2.19757	2.16525	2.2033	2.025	2.12039	2.11701	2.19279	2.3582	2.06756	1.97911	1.9947	2.17086	1.97938	2.3954	2.13825	2.099	2.01953	2.28353	1.81316	1.94048	1.94848	1.87976	1.87661	2.20379	2.19314	2.27781	2.242	2.079	2.09031	2.08
cell4.6	1	0.39772							21	2.07955	2.11209	1.94697	2.017	2.30615	2.2249	2.09747	2.15534	1.85313	2.21703	2.2254	2.30008	2.07843	1.98858	2.10457	2.30736	2.47636	2.05758	2.10204	2.16353	2.17001	1.887	2.47291	2.13453	2.102	2.05621	2.07391	1.77725	1.85933	1.90474	1.91078	1.78584	2.00735	2.17782	2.15957	2.2507	2.071	2.13517	2.119
cell4.7	1	0.251484							22	2.31769	1.98143	2.05078	2.06814	2.27537	2.21697	2.1608	2.13737	1.78399	2.08715	2.32642	2.25327	2.16856	1.95422	2.05448	2.25835	2.45152	2.1172	2.07377	2.17403	2.11373	1.958	2.36059	2.14314	2.037	2.00233	2.18645	1.94732	2.01044	1.9768	1.8851	1.79832	2.06396	2.16699	2.25086	2.21826	2.077	2.24679	2.086
cell5.1	1	0.23206							23	2.25977	2.12917	1.97823	1.92536	2.21287	2.2859	2.12289	2.21786	1.95425	2.14037	2.26882	2.34288	2.168	1.97709	2.08695	2.13693	2.28375	1.87041	2.17826	2.17551	2.11194	1.758	2.34049	2.0715	2.084	2.00616	2.17522	1.79899	1.92329	2.03991	1.91519	1.75474	2.04534	2.28995	2.34615	2.30088	2.219	2.37169	2.228
cell5.2	1	0.248397							24	2.30406	2.07115	1.92207	1.93349	2.21713	2.36496	2.17631	2.13084	1.84076	2.20953	2.09812	2.17364	2.01968	1.98077	2.02179	2.05362	2.13988	2.00749	2.14829	2.14511	2.12285	1.856	2.35917	2.21082	2.081	2.09095	2.2064	1.83312	1.95266	1.89432	1.98179	1.77102	1.90345	2.39543	2.34912	2.3116	2.146	2.20753	2.154
cell5.3	1	0.196							25	2.34733	1.9928	1.95694	2.05698	2.3537	2.24892	2.07145	2.2062	1.91781	2.10736	2.292	2.35348	2.18231	1.96891	2.0156	2.26602	2.29616	2.02098	2.09326	2.14287	2.00569	1.816	2.32438	2.18859	2.003	2.05992	2.18572	1.84376	1.9849	1.96829	1.8852	1.8246	2.03208	2.08067	2.30474	2.27148	2.094	2.16112	2.273
cell5.4	1	0.253426							26	2.24388	1.8906	1.88584	2.02863	2.23299	2.3993	2.16789	2.15415	1.90795	2.09189	2.28902	2.36812	2.04596	2.02167	1.80872	2.21174	2.14322	2.03663	2.09201	2.11681	2.05126	1.808	2.39806	2.09351	2.093	2.08073	2.25138	1.90005	1.8664	2.00649	1.87378	1.7456	2.35561	2.2252	2.28542	2.29524	2.079	2.1583	2.17
cell6.1	1	0.285201							27	2.34175	2.06433	1.95212	1.99418	2.25015	2.31589	2.02853	2.17726	1.96074	2.082	2.32113	2.45377	2.12758	1.9889	1.95946	2.24193	2.29114	2.04958	2.121	2.17608	2.23667	1.754	2.31872	2.21841	2.09	1.93528	2.11294	1.95593	2.01331	2.0008	1.92028	1.83596	2.36215	2.24753	2.3327	2.27189	2.127	2.1529	2.208
cell6.2	1	0.192818							28	2.2901	2.12906	1.92852	2.00666	2.30735	2.2319	2.02339	2.22674	1.96717	2.19995	2.16684	2.2965	2.06163	2.01342	1.92332	2.23326	2.21423	2.09793	2.07864	2.02745	2.24925	1.737	2.27482	2.13292	2.014	1.92025	2.18809	1.96014	1.91646	1.86938	1.83828	1.77141	2.31601	2.18482	2.35386	2.37238	2.182	2.23964	2.176
cell6.3	1	0.373407							29	2.22825	1.93664	2.00955	1.87202	2.02951	2.17355	2.01397	2.08002	1.92499	2.16611	2.17275	2.27228	2.05762	1.98326	1.93178	2.2566	2.09199	2.18428	2.10822	2.11875	2.12238	1.92	2.2559	2.03087	2.086	1.92928	2.25135	1.85464	1.8783	2.00919	1.9888	1.75138	2.24547	2.17637	2.26677	2.25142	2.024	2.17094	2.081
cell6.4	1	0.167268							30	2.17511	1.86882	1.80467	1.81114	2.30834	2.23942	1.91149	2.24184	1.92603	2.14785	2.12578	2.33139	2.05362	1.9531	1.89948	2.3662	2.22514	2.11887	2.10935	2.03	2.09184	1.8305	2.40561	2.03242	2	1.92139	2.27071	1.99438	1.95208	1.91121	1.87774	1.71629	2.18743	2.01135	2.26761	2.24976	2.024	2.29257	2.087
cell6.5	1	0.262346							31	2.09914	1.86722	1.90916	1.92209	2.23571	2.15748	2.06191	2.28119	1.93951	2.1296	2.23018	2.30408	2.18426	2.03438	1.83855	2.26937	2.17414	2.096	2.12816	2.10674	2.13656	1.741	2.17355	1.9038	2.022	1.92498	2.25959	1.87614	1.85525	1.84336	1.9347	1.76454	2.23004	2.1308	2.38855	2.30152	1.92245	2.2219	2.11685
cell6.6	1	0.196793							32	2.19277	1.91487	1.9645	2.00821	2.23806	2.25357	2.1437	2.1978	1.85111	2.18449	2.11771	2.19065	2.2427	2.09694	1.92314	2.20881	2.24865	2.018	1.92727	2.02891	2.17648	1.779	2.33934	2.03436	2.066	1.82222	2.29597	1.93898	1.89336	1.86616	1.87842	1.82045	2.09617	2.08238	2.30572	2.21828	1.96614	2.17522	2.03824
cell7.1	1	0.32353							33	2.27462	1.82191	1.93435	1.87261	2.299	2.20397	2.09396	2.22772	1.68857	2.13596	2.11135	2.24424	2.15536	2.16489	1.82381	2.24025	2.16814	2.094	1.95967	2.11127	2.19492	1.846	2.21785	1.99678	2.067	1.99328	2.30699	1.88022	1.93148	1.94954	1.90076	1.70571	2.30773	2.09291	2.24591	2.22791	1.91851	2.18892	2.27434
cell7.2	1	0.314761							34	2.23118	1.9815	1.8296	2.06277	2.381	2.09734	1.9432	2.18667	1.98517	2.19657	2.28564	2.37518	2.0403	2.07766	1.71067	2.3541	2.24397	2.258	2.12126	1.86566	2.18026	1.77	2.20598	1.99272	2.082	1.93618	2.29071	1.89704	1.93448	1.83755	1.86074	1.72223	2.26106	2.19112	2.35953	2.24645	1.74723	2.22588	2.19114
cell8.1	1	0.401588							35	2.2013	1.78013	1.77028	1.9731	2.244	2.0976	2.13228	2.28711	1.83785	2.17801	2.18225	2.2414	2.11447	2.03	1.73517	2.06556	2.03661	2.178	2.17769	2.14322	2.07108	1.907	2.27437	2.10976	2.102	2.13354	2.21149	1.83961	1.93804	1.89932	1.82523	1.8064	2.21103	2.31077	1.95795	1.97242	2.01079	1.97969	2.01104
cell8.2	1	0.27403							36	2.18952	2.01021	1.72696	2.01069	2.305	2.12322	2.23854	2.14287	1.84807	2.14645	2.20862	2.28839	2.1076	1.95138	1.75968	2.25922	2.29677	2.119	1.96527	2.0431	2.17642	1.91	2.25705	2.08579	2.043	1.88012	2.20915	1.92212	1.92064	1.91093	1.84562	1.68872	2.14172	2.16832	2.15314	2.06552	1.92611	2.03459	2.11515
cell8.3	1	0.263561							37	2.31691	1.90615	1.93837	2.02575	2.217	2.12932	2.19802	2.27336	1.75288	2.09132	2.01615	2.33798	2.03332	2.02848	1.83945	2.22474	1.90588	2.018	2.10382	1.98021	2.0939	1.849	2.35209	2.1185	2.10431	1.93734	2.21631	1.88854	1.93535	1.89912	1.83894	1.74753	2.14587	2.1595	2.03605	2.20005	1.98239	2.18425	2.07096
cell8.4	1	0.24619							38	2.36016	2.0758	1.88236	1.95892	2.107	2.12949	2.018	2.1871	1.80433	2.09661	2.05053	2.37324	2.01451	2.02794	1.9554	2.17403	2.16287	2.095	2.11415	1.97202	2.18174	1.917	2.25285	2.05103	2.0619	1.9309	2.13961	1.86465	1.92624	1.8474	1.87796	1.80401	2.04188	2.17495	2.17466	2.18724	1.96607	2.16833	2.08848
cell8.5	1	0.236094							39	2.18908	1.97735	1.78081	1.85658	2.198	2.23065	2.116	2.10247	1.84874	2.13719	2.15053	2.39265	1.907	2.0138	1.87795	2.14624	2.19035	2.079	2.12235	2.0722	2.14518	1.808	2.3162	2.08288	1.97407	1.91755	2.2169	1.87672	1.99679	1.92959	1.94668	1.67184	1.94672	2.08899	2.04757	2.15801	2.02223	2.03526	2.07844
cell1.1	2	0.296327							40	2.12473	1.8789	1.77253	1.89049	2.187	2.09147	2.184	2.25171	1.91183	2.1889	2.14446	2.34158	1.90279	1.90051	1.85071	2.05019	2.15341	2.143	1.99372	1.80155	2.0909	1.688	2.28004	1.99536	2.05771	2.0474	2.16496	1.75778	2.04896	1.80044	1.88438	1.7135	1.94275	2.07241	2.09778	2.20722	1.99904	2.05157	2.117
cell1.2	2	0.260242							41	2.26027	2.00715	1.87813	1.98199	2.26	2.02795	2.062	2.20616	1.87602	2.14875	2.09389	2.38229	1.91873	2.05331	1.94636	2.05513	2.16594	2.04388	2.11075	2.04547	1.9843	1.785	2.24387	2.05618	1.95992	1.95176	1.92795	1.77563	2.06613	1.8789	1.88888	1.84358	1.96798	2.08075	2.17041	2.24583	1.91013	2.06587	2.1274
cell1.3	2	0.279993							42	2.23326	1.96032	1.83557	1.88301	2.074	2.1928	2.104	2.12053	1.84196	2.11625	2.20205	2.44708	2.10075	1.90458	1.81152	1.96012	2.0683	2.08704	2.03148	2.04081	2.07966	1.7715	2.30916	2.1281	1.92874	1.99451	2.15005	1.86863	1.95403	1.93801	1.96508	1.85625	2.09197	2.12737	2.12433	2.12479	1.90281	2.17711	2.02162
cell1.4	2	0.214505							43	2.11487	2.04664	1.95691	1.91364	2.251	2.19747	1.944	2.1744	1.79775	2.16257	2.01842	2.40595	1.98468	2.00321	1.8412	2.05785	2.06948	2.11144	2.14546	2.00654	2.00419	1.758	2.29724	2.04048	1.89409	2.03842	2.02203	1.9244	1.91383	1.94001	1.70274	1.69858	2.03895	2.02601	2.13306	2.19357	1.83125	2.19294	2.20499
cell2.1	2	0.235692							44	2.04777	1.98343	1.84863	1.86335	2.243	2.07541	1.993	2.10045	1.88531	2.06651	2.06176	2.32735	1.94288	1.92373	1.75188	2.17987	2.1668	2.01541	2.10952	2.07392	2.03358	1.8	2.33556	2.08541	2.07217	1.90954	2.13306	1.94954	2.01104	1.90769	1.89365	1.75846	2.0918	2.18544	2.01667	2.04638	1.91007	2.0341	1.99527
cell2.2	2	0.273427							45	1.97996	2.0918	1.84631	1.93126	2.187	2.24272	1.952	2.16344	1.85705	2.08733	2.05551	2.18803	1.89768	1.89517	1.79724	2.07332	2.15654	2.09302	2.0543	2.0802	2.04307	1.813	2.33682	2.00727	1.94081	1.99584	1.94198	1.86032	1.89555	1.91068	1.90146	1.75912	2.04674	2.06109	2.07848	2.16729	2.04093	2.0876	2.01813
cell2.3	2	0.295334							46	2.08074	2.02057	1.71269	1.85873	2.189	2.26855	2.038	2.23302	2.06993	2.09188	2.19784	2.33638	1.98868	1.86458	1.74544	2.13414	2.07227	1.97412	2.09527	2.1438	2.09466	1.799	2.27647	2.07007	1.9859	1.96459	2.15805	1.87286	1.94455	1.94759	1.87307	1.82407	2.14825	2.06405	1.98476	2.18706	2.02479	2.12681	2.10556
cell2.4	2	0.335044							47	2.05044	1.89701	1.92748	1.78621	2.228	2.10017	1.927	2.06168	1.86873	2.19197	1.95208	2.10385	1.85401	1.84034	1.81686	2.15594	2.0988	1.93075	2.07321	2.12632	2.21826	1.828	2.29701	1.98017	1.9125	1.96131	2.12707	1.96399	1.96387	1.93611	1.84581	1.75767	2.04117	2.04544	2.16811	2.04472	2.12954	2.12157	2.13353
cell2.5	2	0.250942							48	1.99754	1.98908	1.88827	1.81601	2.111	2.0955	2.109	2.12271	1.94194	2.04495	2.00898	2.17601	2.04374	1.94903	1.84742	2.17773	2.12533	2.11959	2.1052	2.03021	2.21088	1.91	2.35688	1.94969	1.84707	2.0105	2.19508	1.81853	1.86896	1.91125	1.92921	1.90579	2.05005	2.06624	2.14488	2.07873	2.04322	2.08507	2.16097
cell3.1	2	0.229282							49	2.1298	1.9948	1.88557	1.93291	2.207	2.17994	1.87	2.39673	1.92031	2.0205	2.11627	2.16437	2.04488	1.93445	1.78768	2.20144	1.9732	1.96853	2.19659	2.06794	2.00513	1.857	2.22247	1.94897	1.91905	1.93406	2.165	1.89564	1.81306	1.89215	1.89195	1.93192	2.05892	2.08705	2.07832	2.20825	2.20295	2.17757	2.06663
cell3.2	2	0.280683							50	2.16438	2.04808	1.79183	1.82621	2.272	2.21689	2.099	2.25049	1.78861	2.0801	2.21293	2.06663	1.92664	1.9732	1.81029	2.24575	2.06944	2.00815	2.01355	1.9481	2.13548	1.911	2.11929	1.95785	1.88863	1.97376	2.28842	1.79215	1.88535	1.79745	1.79569	1.99297	2.1761	2.09612	2.24899	2.16443	1.98729	2.11817	2.08259
cell3.3	2	0.311293							51	2.24994	1.83796	1.97085	1.85644	2.19694	2.06995	2.115	2.23801	1.78065	2.00459	2.19616	2.18162	1.93999	1.71184	1.82168	2.18943	2.13498	1.89619	1.9833	2.05588	2.0554	1.846	2.14644	1.87622	1.85532	1.84078	2.11454	1.89075	1.89498	1.70311	1.87706	1.98056	2.13422	2.05031	2.12816	2.06303	2.12999	1.99988	2.08417
cell3.4	2	0.258596							52	2.04875	2.06039	1.83587	1.94711	2.2717	2.0713	2.088	2.15606	1.81673	2.12548	2.08648	2.09832	1.92759	1.7125	1.79724	2.1607	2.0316	2.02601	2.09057	2.0299	2.21732	1.793	2.10947	1.98166	1.93581	1.87523	2.14461	1.78724	1.9432	1.78964	1.70722	1.83241	2.06115	1.98902	2.08023	2.20217	2.12721	2.19781	2.01351
cell3.5	2	0.260706							53	2.14168	1.99534	1.69085	1.89852	2.18491	2.00975	2.073	2.16787	1.78018	2.07207	2.05163	2.05507	1.81459	1.82818	1.84198	2.25591	1.98881	1.93055	2.0865	2.09107	2.08738	1.836	2.13534	1.98099	1.9583	1.82207	2.07482	1.85225	1.86542	1.67171	1.81297	1.86052	2.08337	2.06699	2.09328	2.12577	1.95265	2.07708	1.97072
cell3.6	2	0.86398							54	2.1205	1.82909	1.89098	1.81293	2.19586	1.97977	2.094	2.22138	1.81071	2.07426	2.2075	2.25215	2.0425	1.83826	1.73099	2.13461	1.95373	2.02297	2.07834	1.79263	1.99232	1.839	2.18307	1.93922	2.01649	1.91139	2.03716	1.75441	1.9876	1.81845	1.84992	1.847	2.08042	2.04546	2.06943	2.0459	2.03072	2.09922	2.0394
cell4.1	2	0.219753							55	2.13325	2.06635	1.70826	1.97641	2.19216	2.02095	2.053	2.14565	1.95174	2.12935	2.07927	2.14106	1.90956	1.90936	1.67778	2.25655	2.0067	1.94565	2.1095	1.96783	1.90035	1.876	2.2351	1.9742	2.06283	1.81741	2.13455	1.83159	2.02806	1.89274	1.88688	1.83349	2.12852	1.99029	2.14236	2.19378	2.12805	2.18333	2.12414
cell4.2	2	0.311639							56	2.1753	1.91611	1.71125	1.99864	2.23147	2.08374	1.972	2.09794	1.81516	2.08915	2.08555	2.07786	1.84986	1.7651	1.75467	1.9825	1.99407	2.11356	2.08959	1.93476	1.94945	1.774	2.17434	1.86329	2.03983	1.91514	2.05402	1.75999	1.65465	1.84971	1.89384	1.80655	1.95239	2.01825	2.05967	2.07021	2.0343	2.1392	2.08482
cell4.3	2	0.24							57	2.35375	2.06988	1.75632	1.91201	2.21409	2.02412	2.046	2.11021	1.86065	2.04776	2.1554	2.27908	1.91513	1.76368	1.67937	2.09298	2.05355	1.99319	2.09336	1.9753	1.97326	1.715	2.20127	2.11169	1.88676	1.85525	1.94421	1.79027	1.89601	1.73824	1.83519	1.98949	2.23928	2.01743	1.99479	2.13893	2.18253	2.1361	2.04189
cell4.4	2	0.227777							58	2.16741	1.89759	1.79685		2.11808	1.81031	2.089	2.05359	1.80646	1.99745	2.10598	2.22882	1.81056	1.9033	1.77657	2.1412	2.22278	1.8803	2.03451	2.03551	1.87913	1.707	2.2081	2.02771	1.87508	1.91144	2.09299	1.77129	1.97471	1.82003	1.84726	1.89563	2.04685	2.11632	2.04504	2.04096	2.02344	1.98958	2.02494
cell4.5	2	0.239262							59	2.1252	1.94444	1.77319		2.16548	2.12185	2.023	2.11183	1.77495	2.02718	2.05657	2.17856	1.96907	2.00822	1.76433	1.99457	2.14007	1.99398	2.01337	2.01111	1.91863	1.742	2.2384	2.0305	2.02297	2.11447	2.03049	1.72442	1.89076	1.8305	1.7805	1.9926	2.028	2.19594	2.05959	2.07395	1.89538	2.0106	2.06224
cell4.6	2	0.40475							60	1.99626	1.92411	1.91109		2.14643	2.03158	2.048	2.07538	1.76506	1.97471	2.23152	2.16587	1.8324	1.8958	1.76439	2.1043	1.99835	1.98744	2.18278	1.93626	1.8627	1.72	2.41437	2.01629	1.98183	1.87713	1.91954	1.86745	1.88961	1.75949	1.93356	1.92213	1.99483	2.01745	2.02957	2.16844	1.97792	1.91324	2.09927
cell4.7	2	0.313639							61	2.02041	1.86191	1.75494		2.0963	1.96032	2.126		1.95842	2.14614	1.94551	2.1947	1.85763	1.94373	1.70079			1.91122	2.05317	2.01224	1.76899	1.705		1.97868	1.94747	1.87444		1.78195	2.07744	1.80636	1.82963	1.95988	2.15109	2.05973	2.02473	2.05688
cell5.1	2	0.280011							62	2.02394	1.96423	1.88146		1.97998	2.08805				2.14778	1.99136	2.20121			1.71787				2.11615						1.901								2.08946	2.09574	2.08311	2.08806
cell5.2	2	0.203407							63	1.89927	1.81018			2.07271	2.06104					2.12734	2.25548			1.80561				2.04182						1.86422								1.97375	2.03391	2.00377	1.99457
cell5.3	2	0.271							64	2.01605	1.83623			2.10096	2.0907					2.04366	2.20106			1.78044				2.06814						1.79922								2.0028	2.16289	1.98694	2.05576
cell5.4	2	0.25922							65	1.96487	1.86411			2.12763	2.14855					2.00594	2.19796			1.77081				2.14691														2.08587	1.99479	2.03606	2.06643
cell6.1	2	0.288959							66	2.02045	1.91223			2.09824	2.06584					1.89233	2.21216			1.79556																		2.09159	2.08699	1.91294	1.88995
cell6.2	2	0.246992							67	1.94024	2.00937			2.07235	2.15172					2.0673	2.17202			1.70506																		2.06183	2.09396	1.85085	1.86473
cell6.3	2	0.332951							68	1.98855	1.80083			2.18504	2.08781					2.0734	2.25715																					2.15273	1.96034	2.02588	2.0253
cell6.4	2	0.221025							69	2.05347	2.09647			2.09176	2.02701					2.03109	2.20865																					1.89121	1.8405	1.92317	1.99268
cell6.5	2	0.198719							70	2.1184	1.88458			2.18536	2.18897					1.92993	2.29879																					1.98822	2.12233	1.93165	2.05728
cell6.6	2	0.174257							71	1.92745	2.00238			2.14565	1.88472
cell7.1	2	0.452164							72	2.06571	1.96322			2.1434	2.19884
cell7.2	2	0.253467							73	2.04412	1.93881			2.12619	1.91032
cell8.1	2	0.344821							74	2.01112	1.97923			2.09309	2.06638
cell8.2	2	0.255487							75	2.07009	1.79498			2.09833	2.08354
cell8.3	2	0.287152							76	2.0588				2.10357	2.1007
cell8.4	2	0.236515							77	2.03696				2.03442	2.11662
cell8.5	2	0.263301							78	2.11949				1.8875	2.05217
cell1.1	3	0.357485							79	2.1047				1.96838	2.08365
cell1.2	3	0.295668							80	1.9766				2.00948	2.03308
cell1.3	3	0.244221							81	1.80838				2.09856	1.96002
cell1.4	3	0.190171							82	1.95924				2.16997	2.10016
cell2.1	3	0.250353							83	1.85573				2.05841	2.09069
cell2.2	3	0.278652							84	1.84319				2.02381
cell2.3	3	0.254817							85	1.99877				2.09067
cell2.4	3	0.240663							86	2.08125				2.12306
cell2.5	3	0.315551							87	2.00563				2.13342
cell3.1	3	0.296674							88	1.92684				1.98018
cell3.2	3	0.269488							89	2.05161				2.06063
cell3.3	3	0.280133							90	1.98889				1.99046
cell3.4	3	0.260095							91	1.97646				2.16082
cell3.5	3	0.243115							92	1.9819				1.95924
cell3.6	3	0.87131							93	2.06893				2.13187
cell4.1	3	0.273406							94	2.05783				2.07519
cell4.2	3	0.338095							95	1.99154				2.16716
cell4.3	3	0.254033							96	1.95448				2.01601
cell4.4	3	0.250425							97	1.98073				1.97721
cell4.5	3	0.263251							98	1.82477				1.91681
cell4.6	3	0.371952							99	2.07627				1.96524
cell4.7	3	0.25022							100	1.97448				2.1525
cell5.1	3	0.213099
cell5.2	3	0.229118
cell5.3	3	0.353
cell5.4	3	0.311318
cell6.1	3	0.253091
cell6.2	3	0.173904
cell6.3	3	0.236107
cell6.4	3	0.208138
cell6.5	3	0.184732
cell6.6	3	0.235307
cell7.1	3	0.458704
cell7.2	3	0.246491
cell8.1	3	0.353116
cell8.2	3	0.245857
cell8.3	3	0.294931
cell8.4	3	0.281371
cell8.5	3	0.211977
cell1.1	4	0.333333
cell1.2	4	0.232359
cell1.3	4	0.262586
cell1.4	4	0.251636
cell2.1	4	0.324192
cell2.2	4	0.291703
cell2.3	4	0.2564
cell2.4	4	0.233287
cell2.5	4	0.28132
cell3.1	4	0.250927
cell3.2	4	0.27871
cell3.3	4	0.3021
cell3.4	4	0.311062
cell3.5	4	0.236529
cell3.6	4	0.70757
cell4.1	4	0.261984
cell4.2	4	0.308294
cell4.3	4	0.385375
cell4.4	4	0.230845
cell4.5	4	0.272372
cell4.6	4	0.387292
cell4.7	4	0.284798
cell5.1	4	0.287573
cell5.2	4	0.314603
cell5.3	4	0.319
cell5.4	4	0.297058
cell6.1	4	0.288369
cell6.2	4	0.212326
cell6.3	4	0.288551
cell6.4	4	0.233001
cell6.5	4	0.243941
cell6.6	4	0.222892
cell7.1	4	0.41256
cell7.2	4	0.221789
cell8.1	4	0.430599
cell8.2	4	0.329096
cell8.3	4	0.298286
cell8.4	4	0.24221
cell8.5	4	0.203378
cell1.1	5	0.329801
cell1.2	5	0.307155
cell1.3	5	0.259597
cell1.4	5	0.245838
cell2.1	5	0.351491
cell2.2	5	0.250726
cell2.3	5	0.232
cell2.4	5	0.296281
cell2.5	5	0.289282
cell3.1	5	0.222598
cell3.2	5	0.274724
cell3.3	5	0.343232
cell3.4	5	0.382467
cell3.5	5	0.221214
cell3.6	5	0.77563
cell4.1	5	0.340003
cell4.2	5	0.342771
cell4.3	5	0.30436
cell4.4	5	0.193737
cell4.5	5	0.341665
cell4.6	5	0.338814
cell4.7	5	0.273982
cell5.1	5	0.224514
cell5.2	5	0.2047
cell5.3	5	0.278
cell5.4	5	0.212157
cell6.1	5	0.346435
cell6.2	5	0.265715
cell6.3	5	0.422788
cell6.4	5	0.244485
cell6.5	5	0.226472
cell6.6	5	0.233859
cell7.1	5	0.348264
cell7.2	5	0.322399
cell8.1	5	0.333214
cell8.2	5	0.277341
cell8.3	5	0.292878
cell8.4	5	0.31288
cell8.5	5	0.228373

## Sheet: fig2-supp2B
ID	lag	maximum lagged difference						raw data	Time_(Frames)	cell1.1	cell1.2	cell1.3	cell1.4	cell1.5	cell1.6	cell1.7	cell1.8	cell1.9	cell1.10	cell1.11	cell1.12	cell1.13	cell1.14	cell1.15	cell1.16	cell1.17	cell2.1	cell2.2	cell2.3	cell2.4	cell2.5	cell2.6	cell2.7	cell3.1	cell3.2	cell3.3	cell3.4	cell3.5	cell3.6	cell3.7	cell3.8	cell3.9	cell3.10	cell3.11	cell3.12	cell3.13	cell4.1	cell4.2	cell4.3
cell1.1	1	0.93265		lag (frame)	mean	SD			1	1.51621	1.743	1.63395	1.62056	1.52576	1.35963	1.45464	1.25919	1.60006	1.55609	1.37986	1.59196	1.60387	1.367	1.45651	1.50957	1.62646	1.54237	1.64737	1.54724	1.59731	1.72676	1.67633	1.68729	1.60349	1.59202	1.47931	1.49484	1.42652	1.40238	1.5479	1.43154	1.46728	1.46633	1.412	1.49384	1.58756	1.65336	1.66649	1.63629
cell1.2	1	0.826		1	0.346792	0.220656			2	1.49802	1.746	1.63013	1.62357	1.53497	1.33467	1.54954	1.28048	1.53163	1.58522	1.35088	1.48455	1.54798	1.34078	1.50629	1.59819	1.57032	1.45425	1.59175	1.65752	1.64336	1.71975	1.72438	1.58874	1.6218	1.60288	1.68587	1.60548	1.37963	1.25927	1.50222	1.44889	1.45779	1.48208	1.32227	1.66304	1.48234	1.59626	1.63895	1.52862
cell1.3	1	0.533991		2	0.376336	0.220635			3	1.47408	1.68	1.69847	1.64705	1.45123	1.38883	1.49182	1.28352	1.57375	1.57658	1.45512	1.61653	1.61274	1.35182	1.6036	1.42279	1.51302	1.3682	1.47108	1.58412	1.59736	1.7415	1.57569	1.43332	1.56904	1.57519	1.70912	1.64029	1.31379	1.39881	1.45976	1.4643	1.50091	1.50093	1.40728	1.53958	1.42163	1.67368	1.57519	1.61283
cell1.4	1	0.724492		3	0.391656	0.226267			4	1.56469	1.693	1.66558	1.57826	1.46635	1.41664	1.4885	1.24506	1.56881	1.56898	1.46217	1.59407	1.53912	1.37973	1.57052	1.49161	1.58011	1.56348	1.49815	1.61802	1.64516	1.72468	1.67738	1.61641	1.55362	1.50534	1.79816	1.62692	1.37502	1.38548	1.48766	1.46018	1.45763	1.4268	1.37163	1.59361	1.51949	0.73395	1.62933	1.61411
cell1.5	1	0.204706		4	0.404477	0.228229			5	1.54149	1.59	1.67283	1.7078	1.60419	1.38263	1.49324	1.23852	1.63215	1.5594	1.38481	1.55427	1.52196	1.3794	1.60399	1.59939	1.57812	1.4672	1.19937	1.68908	1.65887	1.73592	1.70829	1.62656	1.54922	1.58694	1.77871	1.69445	1.49629	1.36101	1.43596	1.46761	1.45419	1.46502	1.43663	1.63761	1.4962	1.34176	1.55286	1.60649
cell1.6	1	0.230906		5	0.39662	0.212289			6	1.61578	1.676	1.75285	1.71134	1.47989	1.33052	1.48762	1.24896	1.58234	1.55428	1.35161	1.53411	1.50804	1.31336	1.5657	1.53528	1.56513	1.37733	1.29733	1.62719	1.62031	1.70608	1.62487	1.57948	1.59028	1.52085	1.81018	1.78081	1.43066	1.32666	1.45938	1.52233	1.51605	1.50053	1.45345	1.69389	1.49693	1.63432	1.55672	1.50066
cell1.7	1	0.302994							7	1.61071	1.673	1.74119	0.986849	1.55077	1.37426	1.58862	1.20806	1.51093	1.63922	1.35214	1.5424	1.48096	1.34294	1.65691	1.53358	1.56453	1.31504	1.2223	1.65421	1.60499	1.68957	1.65433	1.59169	1.48517	1.4166	1.78187	1.73931	1.48405	1.34091	1.40745	1.48413	1.41196	1.44864	1.34525	1.61759	1.45741	1.77278	1.5639	1.56896
cell1.8	1	0.161535							8	1.59231	1.558	1.67505	1.27397	1.59113	1.33092	1.57914	1.20068	1.49859	1.57902	1.40044	1.6366	1.5694	1.09112	1.65134	1.61079	1.61921	1.43754	1.29728	1.65115	1.53617	1.6946	1.56191	1.58037	1.62883	1.54396	1.79232	1.70727	0.994984	1.40312	1.47006	1.48673	1.50951	1.4921	1.46329	1.58798	1.51106	1.7321	1.64079	1.56513
cell1.9	1	0.273079							9	1.71681	1.666	1.66671	1.34673	1.5814	1.52697	1.63008	1.32855	1.5737	1.62173	1.41134	1.5233	1.50313	1.25961	1.65056	1.61939	1.59939	1.41864	1.45186	1.54422	1.57163	1.71042	1.48238	1.70633	1.58462	1.47881	1.8138	1.74352	1.02288	1.40613	1.51085	1.52319	1.44191	1.47827	1.45477	1.7854	1.53401	1.71358	1.60535	1.50365
cell1.10	1	0.213073							10	1.54166	1.566	1.69161	1.45169	1.42517	1.57293	1.50243	1.16701	1.50496	1.58269	1.47485	1.54252	1.53191	1.26099	1.67363	1.61644	1.6024	1.55082	1.43252	1.47362	1.5354	1.65497	1.52783	1.59056	1.61594	1.57505	1.77153	1.77774	1.24279	1.39028	1.44697	1.53574	1.55707	1.54634	1.47693	1.59694	1.56721	1.69443	1.62959	1.4165
cell1.11	1	0.308893							11	1.70904	1.721	1.15762	1.79521	1.56391	1.34202	1.65756	1.24463	1.5541	1.60267	1.41715	1.58087	1.58463	1.13006	1.58857	1.57149	1.63398	1.47704	1.29964	1.56659	1.54958	1.72689	1.52975	1.63594	1.57634	1.53792	1.68381	1.81944	1.40544	1.52622	1.49647	1.53321	1.41403	1.52604	1.48463	1.52786	1.49269	1.68568	1.67364	1.39947
cell1.12	1	0.196501							12	1.82423	1.656	1.31428	1.74319	1.53983	1.39316	1.68557	1.16045	1.54908	1.62173	1.37115	1.58989	1.5136	1.18173	1.44692	1.53317	1.53557	1.46777	1.27841	1.59251	1.61474	1.62339	1.47539	1.72787	1.58186	1.50247	1.69996	1.76011	1.60485	1.4862	1.45218	1.52551	1.44579	1.49451	1.47969	1.50143	1.56288	1.68394	1.61983	1.43751
cell1.13	1	0.188635							13	1.74295	1.629	1.44762	1.762	1.54106	1.4076	1.59629	1.20183	1.58505	1.56164	1.39046	1.51096	1.59344	1.327	1.57518	1.69319	1.5661	1.38351	1.36974	1.62881	1.65051	1.67714	1.75868	1.61911	1.52904	1.44693	1.77807	1.67417	1.60928	1.48199	1.43701	1.56322	1.48	1.5185	1.46712	1.55175	1.62619	1.70875	1.63962	1.41437
cell1.14	1	0.251822							14	1.85973	1.634	1.61197	1.82585	1.56381	1.47254	1.58963	1.18616	1.6389	1.53234	1.42586	1.68167	1.62019	1.23464	1.61267	1.52886	1.62672	1.3665	1.2801	1.62196	1.60405	1.71758	1.62763	1.57653	1.51437	1.50665	1.65887	1.72202	1.47856	1.4836	1.47829	1.50698	1.50449	1.55719	1.45514	1.57302	1.50594	1.68858	1.64789	1.42285
cell1.15	1	0.230599							15	1.81516	1.662	1.79848	1.7324	1.55108	1.4594	1.62772	1.23708	1.48399	1.56314	1.41258	1.5276	1.57237	1.34512	1.60056	1.5421	1.58301	1.41071	1.33916	1.61655	1.49835	1.70632	1.49813	1.6008	1.42122	1.42086	1.63357	1.6183	1.48367	1.5047	1.46158	1.48008	1.36145	1.40125	1.41418	1.611	1.52349	1.69971	1.69565	1.45496
cell1.16	1	0.188429							16	1.7808	1.682	1.94265	1.64674	1.52283	1.49577	1.57174	1.25647	1.57182	1.50722	1.4681	1.49081	1.48044	1.47641	1.55289	1.57914	1.60886	1.4989	1.34765	1.59491	1.56125	1.73358	1.47684	1.5507	1.57584	1.49713	1.66143	1.66783	1.39252	1.4911	1.56779	1.52973	1.50355	1.48438	1.50952	1.58282	1.48331	1.64568	1.60298	1.4389
cell1.17	1	0.141583							17	1.73913	1.68	1.80606	1.62166	1.52596	1.52423	1.59034	1.15108	1.51181	1.52382	1.4188	1.59147	1.63027	1.47569	1.52265	1.39071	1.49251	1.41402	1.42396	1.58248	1.41396	1.52458	1.60113	1.48599	1.56296	1.54347	1.65108	1.69271	1.49821	1.50766	1.54538	1.46852	1.46353	1.49539	1.52107	1.58543	1.58115	1.48238	1.45392	1.28233
cell2.1	1	1.1587							18	1.77276	1.609	1.70927	1.55918	1.54249	1.41931	1.57493	1.21255	1.56362	1.4711	1.51362	1.64751	1.59577	1.49483	1.67515	1.48673	1.59265	1.41823	1.3595	1.59779	1.581	1.72195	1.58559	1.5033	1.5627	1.54563	1.58788	1.51583	1.37541	1.52252	1.66976	1.5838	1.51638	1.49948	1.62658	1.53978	1.54284	1.64319	1.67338	1.26721
cell2.2	1	0.86187							19	1.84067	1.533	1.71417	1.54893	1.51445	1.45512	1.57112	1.24051	1.57559	1.48483	1.44282	1.61411	1.63664	1.52047	1.46411	1.45377	1.55719	1.38682	1.33645	1.58071	1.62368	1.63486	1.53447	1.46918	1.49489	1.46638	1.62578	1.54669	1.42017	1.52981	1.6365	1.4802	1.49531	1.54043	1.60816	1.57662	1.48619	1.69387	1.7018	1.32343
cell2.3	1	0.746222							20	1.82951	1.507	1.60361	1.55293	1.60081	1.44573	1.68564	1.23014	1.62889	1.50701	1.55494	1.65632	1.54553	1.47806	1.49927	1.49044	1.59583	1.39578	1.40646	1.57692	1.71259	1.60484	1.5904	1.45913	1.5615	1.52792	1.56219	1.547	1.41544	1.56098	1.59715	1.51498	1.48045	1.46728	1.52774	1.536	1.45681	1.73487	1.67685	1.25747
cell2.4	1	0.416373							21	1.83539	1.672	1.61101	1.43902	1.59118	1.46141	1.67605	1.1177	1.56019	1.47941	1.47767	1.62211	1.63276	1.36072	1.56415	1.47136	1.47131	1.36353	1.31001	1.65981	1.74281	1.58929	1.6159	1.43969	1.61183	1.5484	1.55858	1.60735	1.39115	1.61488	1.68365	1.50309	1.51308	1.52793	1.53554	1.55325	1.50147	1.62329	1.70543	1.30915
cell2.5	1	0.208993							22	1.88315	1.687	1.69111	0.98945	1.59684	1.55115	1.63475	1.20621	1.63979	1.55402	1.46891	1.58797	1.64775	1.50553	1.56704	1.47565	1.5	1.03352	1.36515	1.60378	1.54489	1.62356	1.57026	1.42629	0.933806	1.664	1.57649	1.57858	1.40531	1.67162	1.6924	1.50423	1.49396	1.56014	1.55128	1.48029	1.46177	1.63088	1.71835	1.25791
cell2.6	1	0.283292							23	1.83494	1.623	1.60123	1.08536	1.57275	1.50686	1.5753	1.22225	1.59666	1.51193	1.32625	1.64203	1.51879	1.46644	1.34857	1.43803	1.4941	1.1067	1.30733	1.59038	1.2979	1.54507	1.59963	1.50266	0.943818	1.64092	1.6654	1.41884	1.37955	1.64842	1.64771	1.47511	1.52502	1.55189	1.58366	1.64925	1.47699	1.64109	1.69966	1.22694
cell2.7	1	0.187687							24	1.94482	1.779	1.74819	1.14782	1.55685	1.51687	1.58337	1.1753	1.67629	1.55347	1.63514	1.58946	1.60857	1.4093	1.52689	1.52853	1.58805	1.11851	1.33708	1.54897	1.53003	1.56855	1.68582	1.49665	1.01208	1.49624	1.64464	1.65171	1.44697	1.64972	1.66115	1.4933	1.58227	1.4658	1.5295	1.56768	1.58908	1.7812	1.65898	1.19244
cell3.1	1	0.678026							25	2.03684	1.764	1.68043	1.19527	1.53696	1.57783	1.67277	1.18834	1.60228	1.51902	1.48188	1.64109	1.65535	1.33286	1.48125	1.49134	1.58151	1.10441	1.36782	1.56947	1.67973	1.67658	1.63592	1.5733	1.09123	1.55408	1.65465	1.4577	1.37946	1.74264	1.70849	1.48287	1.5194	1.38735	1.569	1.62557	1.54974	1.56245	1.61899	1.06177
cell3.2	1	0.557449							26	1.86551	1.69	1.65035	1.30018	1.50825	1.54233	1.66331	1.1252	1.6353	1.55407	1.49048	1.60814	1.53707	1.3659	1.55755	1.56105	1.5108	1.15184	1.21265	1.53732	1.63503	1.51455	1.57525	1.55024	1.15144	1.43544	1.65001	1.46718	1.42676	1.63798	1.654	1.54543	1.48758	1.42241	1.57953	1.60114	1.51158	1.65336	1.72839	1.07476
cell3.3	1	0.328391							27	1.7939	1.705	1.60997	1.55445	1.46782	1.52119	1.57266	1.20381	1.65466	1.51841	1.4788	1.67104	1.69984	1.36253	1.49602	1.5427	1.55223	1.25845	1.28757	1.59772	1.71152	1.62408	1.63578	1.47006	1.18225	1.5066	1.71221	1.5953	1.44072	1.71114	1.57001	1.49779	1.54355	1.4375	1.54333	1.57987	1.55896	1.6971	1.68674	0.971515
cell3.4	1	0.23287							28	1.7013	1.681	1.55841	1.55304	1.41212	1.50836	1.51889	1.11404	1.47517	1.54808	1.49189	1.63622	1.58326	1.3863	1.54552	1.47759	1.54224	1.26302	1.31642	1.68832	1.70217	1.72836	1.68817	1.46267	1.25667	1.60524	1.64722	1.70808	1.45859	1.6031	1.64868	1.49381	1.53221	1.4719	1.53328	1.51495	1.47539	1.56382	1.73209	0.922969
cell3.5	1	0.489062							29	1.68172	1.618	1.60887	1.51004	1.47848	1.4938	1.49611	1.15118	1.46933	1.57	1.52268	1.58078	1.57764	1.37407	1.52998	1.48143	1.49014	1.20074	1.22962	1.6064	1.72378	1.65618	1.60483	1.56055	1.27925	1.51136	1.72475	1.58942	1.41517	1.59079	1.67476	1.49825	1.53156	1.48201	1.56022	1.59208	1.41983	1.63765	1.6251	0.903602
cell3.6	1	0.20259							30	1.87361	1.633	1.60432	1.48429	1.68086	1.57552	1.61759	1.24994	1.63084	1.55186	1.43342	1.6398	1.5649	1.38609	1.64335	1.44515	1.49487	1.3087	1.24873	1.59882	1.61193	1.61125	1.59326	1.49852	1.31796	1.48854	1.68766	1.51153	1.44674	1.58864	1.61863	1.57723	1.51682	1.45894	1.52516	1.65412	1.34995	1.56995	1.67739	0.936501
cell3.7	1	0.575671							31	1.8493	1.663	1.6099	1.35833	1.55256	1.57438	1.66205	1.17569	1.60523	1.5584	1.46658	1.55304	1.61046	1.38183	1.61061	1.52116	1.49674	1.23125	1.23518	1.58715	1.61222	1.56472	1.53104	1.52511	1.27373	1.45438	1.61971	1.299	1.43364	1.70734	1.65211	1.54207	1.47983	1.42865	1.52651	1.62696	1.49828	1.59552	1.68529	0.977129
cell3.8	1	0.163795							32	1.60718	1.629	1.65553	1.39295	1.53144	1.62779	1.64179	1.15612	1.58301	1.44858	1.49073	1.54548	1.63447	1.36663	1.52871	1.3821	1.49228	1.40075	1.13836	1.66491	1.73139	1.6455	1.56736	1.44019	1.4783	1.41868	1.67541	1.418	1.4833	1.59657	1.55793	1.54674	1.45884	1.44893	1.51178	1.53814	1.49101	1.58872	1.65824	0.896423
cell3.9	1	0.294213							33	1.66513	1.616	1.60324	1.3926	1.55322	1.59579	1.60846	1.15467	1.59974	1.60595	1.48974	1.54652	1.63618	1.38278	1.57872	1.42807	1.49238	1.23997	1.18247	1.60105	1.63384	1.67961	1.55602	1.53656	1.47526	1.42664	1.57249	1.393	1.47546	1.53928	1.5691	1.50451	1.49569	1.47635	1.4897	1.55822	1.40496	1.66436	1.68638	0.85888
cell3.10	1	0.15696							34	1.87845	1.419	1.63598	1.43079	1.5594	1.6186	1.71988	1.22527	1.58074	1.58424	1.53808	1.5469	1.65282	1.36584	1.56338	1.44462	1.47415	1.32708	1.16128	1.4747	1.57431	1.55462	1.47365	1.57796	1.57298	1.4212	1.56095	1.542	1.51019	1.58309	1.58535	1.61886	1.43982	1.41675	1.52592	1.56156	1.42095	1.53606	1.56215	0.883208
cell3.11	1	0.192257							35	1.71279	1.697	1.58303	1.30069	1.49606	1.6562	1.68693	1.17735	1.54082	1.61362	1.51389	1.54726	1.63044	1.42232	1.55762	1.47231	1.5522	1.42413	1.19246	1.48085	1.63365	1.61054	1.40083	1.58552	1.55824	1.44742	1.61254	1.443	1.47428	1.60702	1.63142	1.49581	1.49245	1.47073	1.52528	1.53779	1.50561	1.62691	1.71405	0.966079
cell3.12	1	0.197422							36	1.75723	1.646	1.58544	1.27596	1.47683	1.64252	1.58365	1.156	1.61914	1.59773	1.44538	1.58953	1.64956	1.38035	1.59688	1.46018	1.58219	1.29528	1.20601	1.53655	1.73094	1.60772	1.50983	1.54792	1.53324	1.48877	1.62319	1.406	1.4991	1.54318	1.59481	1.46022	1.43419	1.44393	1.50676	1.4816	1.47304	1.67803	1.66142	0.870815
cell3.13	1	0.178794							37	1.85367	1.64	1.61676	1.33761	1.53135	1.55524	1.66935	1.13847	1.69225	1.51271	1.52178	1.60596	1.68748	1.40303	1.36628	1.50726	1.61149	1.29743	1.21949	1.58872	1.73241	1.65118	1.51133	1.48131	1.55667	1.54847	1.69082	1.554	1.49175	1.60415	1.68399	1.55524	1.49063	1.50682	1.47434	1.45984	1.43253	1.74922	1.74678	0.886517
cell4.1	1	0.93973							38	1.75197	1.739	1.54658	1.48271	1.5775	1.68294	1.68674	1.15962	1.68419	1.56002	1.48203	1.58522	1.66073	1.39798	1.5316	1.50649	1.63983	1.3484	1.27635	1.48724	1.53295	1.60308	1.46259	1.44208	1.5469	1.55224	1.67013	1.47	1.45831	1.54453	1.62071	1.53027	1.51506	1.492	1.47374	1.46904	1.38236	1.67413	1.65278	0.947559
cell4.2	1	0.73895							39	1.74534	1.626	1.62503	1.37898	1.50446	1.60076	1.72859	1.14693	1.63519	1.64892	1.47745	1.60026	1.61703	1.36196	1.63868	1.48559	1.68403	1.30043	1.25521	1.55043	1.61591	1.55666	1.46099	1.58106	1.53527	1.55016	1.5904	1.551	1.4567	1.55621	1.58345	1.497	1.40289	1.45783	1.47371	1.52083	1.43601	1.51528	1.75962	0.930087
cell4.3	1	0.232945							40	1.82127	1.757	1.54624	1.39123	1.51447	1.66231	1.68716	1.16004	1.61459	1.52596	1.52039	1.63045	1.68939	1.43668	1.49023	1.47503	1.56179	1.36459	1.29982	1.48742	1.70207	1.60139	1.42269	1.46884	1.55799	1.50043	1.7353	1.504	1.38373	1.53607	1.64343	1.52975	1.50198	1.44569	1.53381	1.58847	1.4189	1.73838	1.71105	0.946161
cell4.4	1	0.335516							41	1.78477	1.689	1.52438	1.34764	1.48049	1.61241	1.64237	1.19483	1.59007	1.60255	1.46697	1.47917	1.58861	1.31732	1.51707	1.5051	1.58735	1.40446	1.22459	1.70226	1.66828	1.56383	1.50872	1.60173	1.49777	1.49925	1.68764	1.516	1.44779	1.65246	1.59798	1.53278	1.42868	1.45189	1.50799	1.53703	1.30556	1.59038	1.69681	1.00742
cell4.5	1	0.273482							42	1.68479	1.71	1.45304	1.48392	1.4968	1.55654	1.69089	1.17889	1.60484	1.5418	1.43422	1.61897	1.62822	1.37548	1.55688	1.44329	1.52914	1.40634	1.10638	1.57947	1.66515	1.5065	1.48071	1.62246	1.42723	1.50299	1.72823	1.431	1.48399	1.51313	1.6335	1.54537	1.37649	1.39011	1.4557	1.5919	1.48435	1.41495	1.66358	0.965195
cell4.6	1	0.227419							43	1.59874	1.702	1.25941	1.48272	1.44956	1.63969	1.51095	1.19312	1.45298	1.43953	1.4749	1.58308	1.53814	1.29401	1.52965	1.49323	1.524	1.39092	1.14136	1.59292	1.62404	1.49246	1.43889	1.49636	1.52093	1.52277	1.64206	1.38	1.46977	1.59072	1.56	1.51545	1.47493	1.49202	1.48339	1.56653	1.49969	1.75232	1.79254	1.08235
cell4.7	1	0.320717							44	1.76529	0.876	1.36388	1.46558	1.49044	1.55713	1.67441	1.20906	1.56256	1.56158	1.48438	1.55257	1.66263	1.40059	1.64166	1.50294	1.4938	1.38593	1.15996	1.64198	1.66527	1.47843	1.61217	1.46449	1.47526	1.49453	1.31367	1.429	1.41639	1.64921	1.64214	1.54415	1.49179	1.44125	1.55977	1.49632	1.4782	1.66003	1.74322	1.03692
cell4.8	1	0.332013							45	1.75786	0.965	1.28776	1.38228	1.51418	1.67825	1.6675	1.08965	1.51064	1.36165	1.32492	1.57409	1.61068	1.30491	1.58434	1.52542	1.46669	1.31769	1.18709	1.53823	1.73619	1.47258	1.51286	1.4974	1.4777	1.58386	1.28426	1.461	1.46632	1.64457	1.5628	1.4892	1.45226	1.395	1.46636	1.55425	1.36432	1.64561	1.69303	1.20497
cell4.9	1	0.207451							46	0.82521	1.026	1.44295	1.36044	1.48939	1.58841	1.6218	1.13079	1.42644	1.50503	1.42378	1.52029	1.65361	1.39869	1.70139	1.4629	1.43783	1.38682	1.09804	1.54513	1.61129	1.61453	1.64123	1.47535	1.48338	1.54571	1.22927	1.417	1.50789	1.74887	1.58897	1.52545	1.44791	1.38932	1.47087	1.52111	1.45532	1.68051	1.8074	1.25594
cell4.10	1	0.294354							47	0.94927	1.004	1.44732	1.40351	1.54602	1.56987	1.77704	1.15711	1.57343	1.57023	1.42849	1.53274	1.68343	1.28969	1.60826	1.4083	1.43208	1.2045	1.14032	1.60398	1.61867	1.54184	1.56751	1.58477	1.45939	1.51774	1.52104	1.422	1.5176	1.6761	1.59303	1.46289	1.52063	1.35328	1.51557	1.37835	1.50828	1.78445	1.69652	1.44301
cell4.11	1	0.189379							48	0.93644	1.099	1.53038	1.39708	1.41559	1.55185	1.47404	1.13398	1.48731	1.53315	1.50949	1.65218	1.60836	1.36392	1.531	1.44831	1.43696	1.30969	1.1854	1.67601	1.73999	1.57987	1.63803	1.77245	1.48005	1.44036	1.70057	1.413	1.43654	1.57173	1.63985	1.40384	1.54106	1.4246	1.4706	1.4526	1.48456	1.5162	1.63104	1.52124
cell5.1	1	0.763326							49	1.10262	1.077	1.65954	1.41386	1.49927	1.60097	1.70475	1.12359	1.5807	1.46312	1.38366	1.61732	1.57408	1.34177	1.57505	1.38395	1.48718	1.39464	1.35596	1.60504	1.72354	1.50311	1.54629	1.6785	1.42495	1.53176	1.66662	1.44	1.37719	1.6371	1.61572	1.51411	1.50954	1.40541	1.48575	1.41102	1.42653	1.62271	0.89209	1.28829
cell5.2	1	0.544182							50	1.17503	1.001	1.52224	1.50885	1.5793	1.53448	1.72442	1.13955	1.5669	1.41878	1.43734	1.59406	1.6322	1.43012	1.5635	1.48365	1.48124	1.35648	1.21122	1.67216	1.6783	1.53296	1.47191	1.61144	1.46424	1.58824	1.5777	1.555	1.33864	1.67978	1.66124	1.48417	1.57795	1.40654	1.50625	1.426	1.40321	1.67502	0.84435	1.23919
cell5.3	1	0.300336							51	1.0616	1.062	1.54358	1.41298	1.52371	1.55031	1.62922	1.18523	1.47717	1.46342	1.47378	1.59884	1.63863	1.35873	1.56792	1.48139	1.59252	1.3348	1.29299	1.61207	1.69502	1.53997	1.50156	1.70064	1.48252	1.57935	1.49545	1.564	1.22104	1.47719	1.71247	1.45561	1.45674	1.40445	1.43246	1.35044	1.42555	1.48896	1.34133	1.21242
cell5.4	1	0.335868							52	1.35498	0.966	1.34291	1.42478	1.51333	1.50634	1.59267	1.11274	1.53182	1.45027	1.49891	1.59106	1.60911	1.36579	1.54228	1.3223	1.45093	1.49304	1.28293	1.6402	1.64216	1.53809	1.50697	1.64294	1.34896	1.49875	1.4959	1.498	1.36263	1.47166	1.48582	1.44044	1.41141	1.33596	1.37581	1.42278	1.53986	1.64229	1.74705	1.29774
cell5.5	1	0.235797							53	1.66167	1.077	1.5184	1.42316	1.48879	1.59749	1.64489	1.18498	1.53452	1.4181	1.43033	1.69176	1.61228	1.36365	1.5576	1.4355	1.49317	1.37784	1.29507	1.61225	1.66253	1.55712	1.49937	1.49596	1.4488	1.65708	1.58757	1.396	1.33952	1.59496	1.54752	1.51074	1.44555	1.38867	1.39425	1.46807	1.50965	1.67376	1.92267	1.29028
cell5.6	1	0.381445							54	1.79443	1.51	1.40765	1.3383	1.4169	1.59671	1.66078	1.14259	1.55473	1.36001	1.53206	1.55463	1.64698	1.35165	1.60916	1.51335	1.50074	1.42753	1.37845	1.59158	1.71465	1.61992	1.37674	1.53483	1.47264	1.70286	1.56279	1.549	1.43268	1.63739	1.69658	1.44516	1.46064	1.36017	1.49307	1.5054	1.4435	1.62523	1.73142	1.34427
cell5.7	1	0.251495							55	1.73953	1.613	1.49414	1.37205	1.48689	1.45058	1.63792	1.08276	1.6074	1.36435	1.50372	1.47902	1.65038	1.35114	1.60227	1.58384	1.5122	1.34276	1.18121	1.42907	1.69046	1.61557	1.39077	1.55618	1.54005	1.65291	1.52001	1.447	1.32008	1.47594	1.62489	1.4567	1.38677	1.3178	1.48829	1.44109	1.49014	1.78524	1.65523	1.42391
cell5.8	1	0.334853							56	1.67809	1.386	1.59549	1.38945	1.53081	1.52903	1.711	1.09718	1.60891	1.32834	1.425	1.44476	1.53895	1.4073	1.70743	1.55335	1.46786	1.27017	1.44902	1.68001	1.56001	1.66658	1.5261	1.54405	1.4471	1.48867	1.51647	1.497	1.36302	1.50151	1.53471	1.45531	1.38978	1.37868	1.4656	1.37778	1.55588	1.74438	1.44452	1.42688
cell5.9	1	0.163807							57	1.61072	1.568	1.63614	1.35457	1.53529	1.54864	1.65333	1.11512	1.63075	1.32188	1.43072	1.53582	1.52384	1.30013	1.6016	1.52372	1.49739	1.43032	1.34345	1.59176	1.6238	1.61321	1.49519	1.52027	1.54579	1.65859	1.48902	1.441	1.33795	1.58654	1.71431	1.55207	1.5633	1.28378	1.54775	1.41892	1.58548	1.52222	1.17482	1.30558
cell5.10	1	0.226254							58	1.52428	1.523	1.52208		1.49651	1.63528	1.50177	1.11331	1.49182	1.37797	1.39221	1.72368	1.6119	1.32958	1.57802	1.44244	1.4808	1.2684	1.38232	1.63227	1.73025	1.64062	1.6459	1.45754	1.49934	1.6052	1.34968	1.522	1.34978	1.51375	1.77959	1.47409	1.51116	1.44074	1.55821	1.44408	1.67069	1.80187	1.2349	1.33561
cell5.11	1	0.261384							59	1.57229	1.502	1.64197		1.54817	1.62525	1.53805	1.1722	1.58786	1.47681	1.28325	1.6004	1.52695	1.3818	1.5986	1.55765	1.45114	1.28853	1.47866	1.54345	1.66918	1.59382	1.59123	1.39507	1.5645	1.53192	1.48934	1.543	1.3119	1.55088	1.68808	1.5331	1.49411	1.49697	1.50921	1.37706	1.58003	1.80835	1.23763	1.34097
cell5.12	1	0.317421							60	1.47996	1.376	1.5745		1.55633	1.54296	1.51485	1.09163	1.57864	1.6638	1.39379	1.64819	1.62292	1.38355	1.63963	1.45185	1.43272	1.31392	1.35324	1.54852	1.72872	1.49459	1.5178	1.4046	1.41509	1.4225	1.57712	1.609	1.36352	1.51275	1.49091	1.47318	1.42049	1.35452	1.44653	1.47616	1.5161	1.75021	1.24095	1.37565
cell6.1	1	0.376554							61	1.50042	1.482	1.58892		1.46274	1.59616	1.55092	1.14734	1.47913	1.75619	1.32253	1.4604	1.6138	1.30016	1.64146	1.46838	1.49101	1.25243	1.17342	1.43586	1.66268	1.51487	1.50774	1.42356	1.5274	1.61828	1.49037	1.574	1.24545	1.5289	1.67266	1.46856	1.49568	1.4252	1.52515	1.45164	1.62704	1.74865	1.3545	1.38613
cell6.2	1	0.097813							62	1.55799	1.488	1.57777		1.46515	1.55598	1.52085	1.0965	1.55493	1.63338	1.32926	1.54821	1.69999	1.36822	1.5757	1.4046	1.41178	1.18956	1.31366	1.44915	1.55852	1.62943	1.41446	1.55366	1.54223	1.61016	1.53052	1.532	1.27257	1.571	1.70018	1.45962	1.51461	1.28932	1.42573	1.59474	1.57629	1.63516	1.32018	1.40868
cell6.3	1	0.165433							63	1.58085	1.482	1.55964		1.48924	1.5633	1.62855	1.14051	1.48642	1.7145	1.35491	1.71373	1.73788	1.36785	1.63941	1.48156	1.40626	1.29486	1.43803	1.61415	1.59636	1.63598	1.46269	1.44503	1.56275	1.72655	1.42293	1.466	1.17068	1.42004	1.67447	1.35638	1.41786	1.38862	1.52737	1.47414	1.52029	1.6737	1.32796	1.34563
cell6.4	1	0.158256							64	1.64669	1.404	1.49837		1.47758	1.5446	1.60861	1.16618	1.53639	1.65831	1.46275	1.68576	1.6909	1.50446	1.59861	1.42388	1.50037	1.16122	1.56332	1.61367	1.64043	1.57584	1.36827	1.60224	1.53556	1.62204	1.42617		1.31357	1.37109	1.62397	1.37256	1.39371	1.37985	1.51751	1.42057	1.55372	1.63475	1.50332	1.37062
cell6.5	1	0.181726							65	1.65655	1.335	1.48209		1.47726	1.49603	1.57976	1.14359	1.48161	1.48956	1.35723	1.70605	1.62391	1.41538	1.55681	1.408	1.36829	1.41025	1.3515	1.7692	1.5336	1.62624	1.60181	1.50285	1.47348	1.61307	1.47264		1.3065	1.53606	1.62581	1.4859	1.42115	1.33266	1.50479	1.51242	1.63541	1.66707	1.73437	1.41447
cell6.6	1	0.517712							66	1.54836	1.468			1.38819	1.39333	1.42666	1.10838	1.45437	1.58659	1.47589	1.6738	1.63463	1.4878	1.63323	1.51041	1.4925	1.38375	1.50522	1.65354	1.57145	1.58196	1.54705	1.64496	1.46694	1.65629	1.4484		1.41406	1.50201	1.63011	1.39973	1.44734	1.36726	1.48248	1.53799	1.64556	1.64019	1.62213	1.34298
cell6.7	1	0.161357							67	1.61687	1.403			1.45693	1.57329	1.54448	1.14769	1.52051	1.54368	1.48154	1.69203	1.70175	1.42095	1.51386	1.57412	1.59433	1.19109	1.38859	1.66161	1.58899	1.57306	1.56248	1.60203	1.47938	1.56183	1.44521		1.51199	1.49148	1.54102	1.39512	1.35111	1.41543	1.4933	1.44279	1.58661	1.66507	1.56906	1.32443
cell6.8	1	0.205876							68	1.73465	1.458			1.39489	1.54691	1.60171	1.16875	1.53453	1.55998	1.45936	1.76049	1.70633	1.40724	1.49674	1.43089	1.47191	1.14909	1.23078	1.69153	1.68612	1.47035	1.61339	1.58447	1.54892	1.65885	1.38559		1.4951	1.36059	1.69655	1.4098	1.41755	1.47562	1.50058	1.50196	1.56323	1.41655	1.65521	1.32502
cell6.9	1	0.460087							69	1.75796	1.45			1.47639	1.54018	1.4572	1.10885	1.53111	1.48456	1.54016	1.7548	1.63194	1.47865	1.5478	1.46258	1.56054	1.23836	1.61695	1.52749	1.64107	1.5851	1.56948	1.54819	1.48958	1.57417	1.31378		1.43481	1.32011	1.70738	1.42505	1.44749	1.57661	1.38085	1.44892	1.60117	1.60285	1.55727	1.37051
cell6.10	1	0.229972							70	1.66179	1.368			1.45327	1.62203	1.50604	1.15891	1.45006	1.5919	1.42779	1.59323	1.54856	1.44069	1.60371	1.42363	1.52041	1.59463	1.43585	1.36891	1.50232	1.62036	1.49817	1.54292	1.49121	1.62181	1.38797		1.51254	1.38685	1.65854	1.41914	1.40977	1.56283	1.47787	1.49389	1.52666	1.66752	1.67766	1.37612
cell6.11	1	0.30781							71	1.44571	1.449			1.32408	1.4906	1.51544	1.16457	1.41101	1.69041	1.47838	1.63807	1.70253	1.36724	1.48506	1.34577	1.48907	1.55948	0.9168	1.67193	1.542	1.59133	1.56503	1.52804	1.46889	1.5045	1.38289		1.4402	1.42133	1.62696	1.4132	1.39338	1.54086	1.48585	1.44304	1.61235	1.70383	1.61714	1.38477
cell6.12	1	0.248652							72	1.43257	1.522			1.35017	1.38539	1.53652	1.13569	1.36187	1.58671	1.46185	1.56105	1.66819	1.41597	1.58189	1.31179	1.45411	1.81296	1.31858	1.58494	1.45694	1.60892	1.57164	1.49015	1.46416	1.64914	1.39359		1.40658	1.50087	1.5888	1.37443	1.41063	1.47368	1.48812	1.39493	1.54744	1.75045	1.73916	1.31134
cell6.13	1	0.292577							73	1.70867	1.417			1.4417	1.46169	1.6277	1.15476	1.44564	1.50524	1.48364	1.5747	1.69732	1.45934	1.54372	1.43405	1.44658	1.24941	1.29947	1.55395	1.51302	1.53079	1.56023	1.48462	1.49521	1.54252	1.4361		1.52281	1.4556	1.60702	1.41325	1.44277	1.47843	1.47401	1.44969	1.48531	1.66978	1.67147	1.36206
cell6.14	1	0.462358							74	1.73855	1.473			1.48262	1.51322	1.69618	1.13724	1.44362	1.43338	1.45647	1.63699	1.71777	1.3805	1.52798	1.39971	1.53851	1.53029	1.50201	1.65121	1.38096	1.59615		1.46245	1.45789	1.57731	1.40642		1.47017	1.53963	1.56752	1.36825	1.50445	1.44817	1.48835	1.42384	1.31493	1.76409	1.65631	1.29617
cell6.15	1	0.235623							75	1.83002	1.524			1.52281	1.49701	1.69889	1.20923	1.47934	1.42006	1.45809	1.60072	1.61292	1.42014	1.64569	1.40691	1.52732	1.49272	1.36161	1.88449	1.59555	1.61991		1.45143	1.53922	1.7075	1.46135		1.44134	1.64623	1.60905	1.30407	1.56475	1.46295	1.4361	1.34997	1.48325	1.71177	1.6259	1.32695
cell7.1	1	0.759159							76	1.74688	1.486			1.41739	1.44943	1.68442	1.15729	1.43594	1.46654	1.43504	1.54215	1.60423	1.51132	1.47867			1.64004	1.38811	1.59966	1.49606	1.6257		1.36681	1.49618	1.65416	1.39607		1.42568	1.57303	1.72112	1.40019	1.54838	1.48524	1.4442	1.4565	1.39732	1.70116	1.54424	1.29327
cell7.2	1	0.77303							77	1.72802	1.53			1.46519	1.46671	1.75551	1.20183	1.47174	1.63607	1.53283	1.53018	1.62931	1.3028	1.56627			1.6277	1.46326	1.65261	1.57233	1.6276		1.37044	1.50991	1.70004	1.43884		1.35732	1.5186	1.64257	1.54358	1.54256	1.37824	1.45773	1.3655	1.51409	1.7031	1.50775	1.23808
cell7.3	1	0.352137							78	1.70017	1.476			1.45545	1.37085	1.64402	1.11828	1.45702	1.63903	1.55849	1.48849	1.68198	1.39063	1.53713			1.88326	1.81598	1.63716	1.60237	1.72673		1.42416	1.42165	1.76445	1.38353		1.30757	1.44445	1.73024	1.44803	1.49835	1.41925	1.51286	1.39615	1.46367	1.72532	1.61954	1.27884
cell7.4	1	0.169963							79	1.86057	1.517			1.45083	1.40393	1.6806	1.22371	1.4237	1.42596	1.47873	1.64315	1.72997	1.33633	1.54672			1.97097	1.74455	1.42363	1.57839	1.7627		1.40535	1.51852	1.74468	1.48472				1.65839	1.47531	1.47435	1.41651	1.45948	1.44119	1.46983	1.59672	1.52097	1.24407
cell7.5	1	0.292109							80	1.69878	1.557			1.501	1.5021	1.70864	1.17317	1.40183	1.52136	1.46275	1.61184	1.6093	1.35277	1.54634			2.05867	1.17071	1.59877	1.567	1.58658		1.42615	1.4881	1.68956	1.67237				1.65687	1.45411	1.48823	1.49523	1.48224	1.4586	1.41609	1.61363	1.58106	1.32058
cell7.6	1	0.360932							81	1.6575	1.554			1.45794	1.41798	1.67786	1.18686	1.42325	1.49071	1.46132	1.63665	1.69253	1.40801	1.5777			2.14638	1.23012	1.57264	1.54984	1.71105		1.39999	1.49179	1.63651	1.6354				1.65462	1.4412	1.46227	1.4885	1.42538	1.49995	1.51902	1.62906	1.65062	1.29689
cell7.7	1	0.24669							82	1.67413	1.421			1.45853	1.47752	1.77463	1.19695	1.51073	1.50182	1.59591	1.56721	1.57612	1.41434	1.6771			2.07068	1.28954	1.43916	1.65749	1.653		1.42142	1.47332	1.48531	1.64525				1.61695	1.44169	1.4234	1.45397	1.52931	1.54262		1.71328	1.66116	1.29174
cell7.8	1	0.184678							83	1.62213	1.531			1.36491	1.46853	1.67375	1.25826	1.51139	1.45898	1.48965	1.55879	1.47849	1.43759	1.57661			1.43338	1.44534	1.52741	1.61992	1.63889		1.4	1.44916	1.58259	1.68985				1.6435	1.48179	1.45891	1.31077	1.48217	1.48481		1.74756	1.60261	1.19543
cell7.9	1	0.191457							84	1.64029	1.533			1.41541	1.45118	1.63468	1.23147	1.4898	1.53964	1.50515	1.54742	1.66713	1.41329	1.5572			1.39568	1.43238	1.51693	1.57675	1.54523		1.42065	1.47126	1.65315	1.58841				1.66051	1.36232	1.55973	1.36967	1.45501	1.42947		1.75491	1.5594	1.24727
cell7.10	1	0.240394							85	1.6847	1.382			1.38062	1.4639	1.60464	1.21396	1.40742	1.49415	1.58837	1.50583	1.66772	1.37312	1.44965			1.35824	1.30164	1.58037	1.55418	1.64924		1.39854	1.42343	1.56933	1.61994				1.58256	1.52611	1.50864	1.40849	1.50735			1.64641	1.62966	1.23174
cell7.11	1	0.161383							86	1.64662	1.331			1.42333	1.49123	1.71766	1.26337	1.42952	1.58241	1.4415	1.52943	1.64275	1.47026	1.53233			1.3208	1.76586	1.5329	1.58492	1.5914			1.44871	1.5757	1.70921				1.51323	1.51592	1.49841	1.45047	1.50213			1.63208	1.66039	1.24338
cell7.12	1	0.235401							87	1.56918	1.312			1.41582	1.5753	1.66186	1.26833	1.48456	1.46521	1.47707	1.52857	1.59908	1.47941	1.53021			1.28336	1.29627	0.903218	1.6167	1.57239			1.46059	1.60641	1.70147				1.63623	1.51137	1.49862	1.386	1.5391			1.64859	1.60681	1.18754
cell7.13	1	0.219931							88	1.6092	1.388			1.44474	1.41491	1.65976	1.27494	1.43354	1.41729	1.52127	1.50715	1.68258	1.46519	1.54353			1.24592	1.40025	0.978152	1.64106	1.61285			1.46069	1.66559	1.64155				1.54755	1.43524	1.49244	1.41423	1.51861			1.5481	1.67403	1.13848
cell1.1	2	1.0104							89	1.6228	1.471			1.47456	1.52551	1.59468	1.24181	1.46152	1.50149	1.40226	1.52993	1.60421	1.44154	1.61111			1.20848	1.24148	1.00054	1.34542	1.56962			1.43759	1.6162	1.6569				1.62532	1.51008	1.40747	1.40166	1.44428			1.41538	1.53761	1.10187
cell1.2	2	0.834							90	0.74401	1.552			1.38987	1.56659	1.73143	1.23533	1.38896	1.51184	1.46754	1.55854	1.59626	1.39697	1.62197			1.17104	1.11643	1.64395	1.2545	1.50904			1.46468	1.5508	1.62349				1.57825	1.45423	1.45435	1.39715	1.403			1.50945	1.61292	1.12696
cell1.3	2	0.509096							91	1.33641	1.593			1.4594	1.48389	1.57032	1.23548	1.44357	1.46143	1.46192	1.57078	1.61939	1.55816	1.6272			1.1336	1.407	0.897731	1.63212	1.59503			1.43614	1.63366	1.62886				1.68934	1.50761	1.47152	1.47297	1.49242			1.53249	1.61942	1.20946
cell1.4	2	0.720949							92	1.75441	1.447			1.43722	1.37752	1.69677	1.30001	1.52534	1.50339	1.43698	1.47301	1.50726	1.41915	1.4537			1.09616	1.52558	0.96351	1.59394	1.5508			1.46742	1.07621	1.57222				1.61919	1.51622	1.51036	1.43432	1.45891			1.57207	1.5797	1.18942
cell1.5	2	0.28902							93	1.70496	1.553			1.46053	1.54767	1.65427	1.25124	1.42379	1.56698	1.40395	1.49822	1.6122	1.39469	1.51532			1.05872	1.33793	1.60643	1.61697	1.60701			1.4525	1.46048	1.58146				1.71852	1.40764	1.62481	1.46358	1.46584			1.46379	1.57551	1.22056
cell1.6	2	0.242003							94	1.66155	1.471			1.50235	1.49591	1.7382	1.22652	1.46793	1.44014	1.38943	1.56316	1.59468	1.34184	1.59697			1.02128	1.27626	1.57267	1.58792	1.46267			1.49975	1.55696	1.64318				1.55411	1.37153	1.52341	1.33119	1.41957			1.68075	1.5007	1.13471
cell1.7	2	0.250377							95	1.7103	1.432			1.48424	1.47112	1.63176	1.31027	1.53666	1.53513	1.42926	1.50856	1.55462	1.33046	1.50801			0.98384	1.21459	1.53685	1.45871	1.5631			1.5298	1.59166	1.7531				1.56865	1.37576	1.46076	1.29439	1.50777			1.64718	1.64284	1.21338
cell1.8	2	0.135897							96	1.56622	1.554			1.44778	1.48316	1.65496	1.21816	1.4909	1.48098	1.35413	1.50478	1.49463	1.3417				1.27325	1.54214	1.54703	1.62646	1.39786			1.4751	1.57814	1.5839				1.60405	1.41373	1.52744	1.29681	1.51799			1.55992	1.52882	1.25686
cell1.9	2	0.284696							97	1.53089	1.598			1.43663	1.51474	1.54488	1.20253	1.45987	1.47758	1.40636	1.57158	1.66795	1.38335				1.41681	1.55307	1.45688	1.6449	1.467			1.48701	1.56436	1.6612				1.54133	1.51406	1.38849	1.29145	1.55533			1.70163	1.6452	1.20799
cell1.10	2	0.285827							98	1.52971	1.53			1.50363	1.46283	1.58299	1.2513	1.4469		1.3893	1.49213	1.58971	1.4367				1.56037	1.38078	1.44236	1.58028	1.41077			1.47952	1.55868	1.50221				1.54817	1.39054	1.43108	1.31447	1.42359			1.54326	1.6115	1.15854
cell1.11	2	0.166233							99	1.48571	1.38			1.45801	1.50914	1.57802	1.22371	1.44528		1.35702	1.56501	1.65643	1.37035				1.14161	1.49288	1.50446	1.47618	1.4412			1.49725	1.62106	1.61556				1.61992	1.36753	1.52934	1.35643	1.4953			1.59213	1.55265	1.28114
cell1.12	2	0.27892							100	1.58252	1.368			1.45044	1.4648	1.54334	1.23242	1.44251		1.40215	1.59304	1.68104	1.43064				2.12314	1.53104	1.63932	1.45599	1.42888			1.47301	1.63165	1.539				1.56902	1.35187	1.51452	1.36166	1.49243			1.47028	1.50723	1.21918
cell1.13	2	0.214039							101	1.54889	1.423			1.44995	1.4469	1.47992	1.22085	1.38109		1.37172	1.43643	1.60089	1.38555				1.44118	0.82419	1.63747	1.49743	1.50775			1.49606	1.69268	1.53755				1.54617	1.39056	1.59207	1.38972	1.45648				1.55257	1.17349
cell1.14	2	0.241769							102	1.51255	1.418			1.40895	1.4193	1.45567	1.21794	1.52092		1.42156	1.51838	1.60355	1.41782				1.28194	1.39544	1.54504	1.50192	1.42805			1.43978	1.67903	1.5948				1.5538	1.44381	1.5636	1.39349	1.44821				1.5333	1.24201
cell1.15	2	0.2724							103	1.56162	1.5			1.45134	1.45517	1.66847	1.30739	1.48802		1.41267	1.53312	1.64021	1.45602				1.1227	1.54579	1.66137	1.44856	1.56774			1.48816	1.62425	1.42518				1.4052	1.43244	1.44783	1.46648	1.48885				1.45312	1.17097
cell1.16	2	0.191047							104	1.54065	1.474			1.48353	1.34757	1.68362	1.29285	1.47666		1.41466	1.57931	1.66458	1.40285				1.17366	1.30877	1.76023	1.59062	1.59971			1.55646	1.64338	1.52607				1.60584	1.51358	1.48869	1.31705	1.54375				1.50088	1.22019
cell1.17	2	0.226037							105	1.55619	1.571			1.49447	1.50272	1.62163	1.24652	1.50203		1.4005	1.67888	1.60516	1.27288				1.22462	1.2471	1.62299	1.60983	1.53896			1.42395	1.61226	1.35986				1.53681	1.47759	1.48961	1.40822	1.52432				1.54024	1.12224
cell2.1	2	1.17554							106	1.62764	1.421			1.41304	1.38442	1.65748	1.25641	1.53738		1.39291	1.60232	1.49173	1.27234				1.87	1.49603	1.6347	1.63492	1.54184			1.49926	1.62035	1.36738				1.58705	1.46997	1.47003	1.37212	1.56481				1.59831	1.17346
cell2.2	2	0.73184							107	1.62813	1.434			1.48897	1.42424	1.75884	1.26672	1.54412		1.30613	1.59638	1.64279	1.18952				1.82541	1.41803	1.50284	1.74583	1.60006			1.49174	1.56522	1.55746				1.58548	1.43459	1.59583	1.33727	1.49077				1.57932	1.14548
cell2.3	2	0.708697							108	1.58961	1.356			1.44831	1.47418	1.65721	1.17707	1.5787		1.41873	1.52432	1.62122	1.32116				1.78083	1.24811	1.53023	1.68958	1.56788			1.43277	1.69469	1.50224				1.64619	1.36747	1.57767	1.34862	1.54675				1.54514	1.10943
cell2.4	2	0.444916							109	1.54992				1.41367	1.44978		1.17149	1.53757		1.33971	1.50736	1.56838	1.39354				1.73624	1.00028	1.64055	1.6382	1.52929			1.43819	1.64766	1.48612				1.52862	1.37204	1.56129	1.32843	1.53703				1.61064	1.13654
cell2.5	2	0.213815							110	1.60884				1.42585	1.45136		1.17296	1.48253		1.3745	1.57561	1.56696	1.3679				1.04584	1.27478	1.53866	1.71614	1.52833			1.46809	1.6985	1.51497				1.63116	1.34893	1.54804	1.33635	1.48804				1.50134	1.16362
cell2.6	2	0.260554							111	1.50464				1.42046	1.41311		1.23666	1.58512		1.34216	1.61986	1.68417	1.43078				0.71293	1.2032	1.58871	1.53443	1.56674			1.43212	1.69782	1.65176				1.40513	1.41264	1.4419	1.33456	1.51298				1.59467	1.15239
cell2.7	2	0.297103							112	1.47738				1.43075	1.52943		1.22894	1.56971		1.3093	1.54686	1.60872	1.40988				1.64888	1.08382	1.62093	1.66336	1.55307			1.48379	1.77095	1.50636				1.48291	1.34544	1.64867	1.38525	1.33898				1.49507	1.10416
cell3.1	2	0.668014							113	1.52395				1.41583	1.44728		1.27761	1.57011		1.37048	1.61161	1.68143	1.35898				1.29141	1.38302	1.61957	1.66831	1.58497			1.46111	1.75601	1.57326				1.47767	1.40395	1.64826	1.30495	1.36516				1.5287	1.17628
cell3.2	2	0.480745							114	1.52705				1.46746	1.45591		1.28432	1.56828		1.30841	1.64729	1.67332	1.31167				0.93395	1.54179	1.52396	1.82613	1.62959			1.44205	1.73717	1.55931				1.11239	1.4726	1.6869	1.36589	1.49934				1.66062	1.14494
cell3.3	2	0.471294							115	1.47856				1.39207	1.50829		1.23576	1.48235		1.39389	1.60288	1.61003	1.22608				2.02521	1.52713	1.4032	1.6732	1.60805			1.43679	1.75267	1.672				1.68806	1.41137	1.49999	1.40185	1.65319				1.49052	1.1525
cell3.4	2	0.29042							116	1.54585				1.43033	1.46071		1.30293	1.61635		1.36669	1.58304	1.68223					0.86651	1.261	1.39038	1.74044	1.65597			1.43214	1.7513	1.655				1.67021	1.46577	1.31895	1.31027	1.62569				1.64764	1.12146
cell3.5	2	0.461162							117	1.50814				1.3878	1.46269		1.16024	1.55223		1.27546	1.66552	1.67926					0.84967	1.20518	1.41286	1.59799	1.67959			1.44284	1.73009	1.662				1.73505	1.51985	1.61316	1.35541	1.57372				1.61181	1.09976
cell3.6	2	0.208115							118	1.54759				1.40976	1.4622		1.30744	1.558			1.6991	1.66211					0.83283	1.52556	1.51026	1.6276	1.64495			1.39539	1.55184	1.61				1.55558	1.46439	1.65624	1.29288	1.4381				1.5152	1.11956
cell3.7	2	0.557816							119	1.46222				1.35291	1.49666		1.2408	1.62044			1.64131	1.73767					1.54819	1.20478	1.56741	1.49518				1.36982	1.73975	1.515				1.4595	1.43189	1.72144	1.31712	1.49478				1.6295	1.14721
cell3.8	2	0.239512							120	1.43416				1.34059	1.44431		1.36012	1.56883			1.60689	1.59868					1.59909	1.34774	1.47382	1.56126				1.40244	1.61732	1.616				1.48095	1.38081	1.74853	1.39744	1.54433				1.46936	1.04248
cell3.9	2	0.367949							121	1.47442				1.33989	1.4212			1.58097			1.52943	1.60663					0.96065	1.42519	1.54824	1.55123				1.44049	1.67185	1.528				1.52427		1.57001	1.45238	1.49272				1.49224	1.09306
cell3.10	2	0.213191							122	1.45386				1.39456	1.50063			1.48251			1.63858	1.60802					1.41434	1.53854	1.4714	1.5554				1.45204	1.61434	1.366				1.5257		1.56922	1.4884	1.53531				1.51621	1.13885
cell3.11	2	0.288033							123	1.40954				1.37667	1.43988			1.51904			1.54658	1.6511					1.45016	1.21091	1.61033	1.41812				1.4131	1.62984	1.314				1.57026		1.61232	1.49038	1.54073				1.47809	0.959645
cell3.12	2	0.257538							124	1.35023				1.30126	1.44174			1.33021			1.74308	1.73822					1.48597	1.39843	1.6583	1.47528				1.43453	1.55766	1.543				1.55756		1.46785	1.5038	1.53264				1.57979	1.06156
cell3.13	2	0.232516							125	1.41035				1.28434	1.44785			1.48986									1.52179	1.20778	1.65959	1.44697				1.43971	1.52603	1.454				1.61156		1.46108	1.47609	1.48866				1.66374	0.948061
cell4.1	2	0.90037							126	1.35382				1.42151	1.50763			1.43262									0.9525	1.39289	1.66163	1.42771				1.39214	1.5863	1.535				1.6435		1.48779	1.47517	1.55653				1.54422	1.0728
cell4.2	2	0.9027							127	1.52582				1.53421	1.45702			1.57752									1.53835	1.20808	1.64197	1.47063				1.36299	1.71964	1.451				1.65463		1.58807	1.49829	1.54799				1.56418	1.0669
cell4.3	2	0.282047							128	1.52187				1.56284	1.36868			1.55837									1.50814	1.38071	1.67195	1.49054				1.38385	1.68997	1.596				1.56697		1.57215	1.44115	1.53738				1.61395	1.0636
cell4.4	2	0.301632							129	1.51436				1.45838	1.45284			1.54344									1.58352	1.19835	1.61977	1.43308				1.33578	1.58451	1.498				1.68445		1.61827	1.35282	1.63097				1.49445	1.0335
cell4.5	2	0.198983							130	1.45751				1.44926	1.42818			1.46317									1.6589	1.50943	1.61963	1.50706				1.41953	1.54648	1.44				1.52144		1.64845	1.44001	1.49991				1.60197	1.00477
cell4.6	2	0.256951							131	1.49246				1.51088	1.4461			1.5021									1.22812	1.66069	1.58158	1.55652				1.40151	1.60007	1.473				1.5213		1.64718	1.37724	1.52808				1.51896	0.992824
cell4.7	2	0.362125							132	1.43673				1.42632	1.52955			1.3439									0.98716	1.38264	1.5189	1.56761				1.42408	1.49774	1.439				1.40246		1.50004	1.48485	1.55411				1.52188	1.01024
cell4.8	2	0.333614							133	1.45368				1.51	1.55201			1.48185									1.09643	0.97288	1.44076	1.44636				1.32391	1.46032	1.404				1.45903		1.41866	1.38536	1.36185				1.50039	1.08259
cell4.9	2	0.403798							134	1.56951				1.40349	1.51609			1.55985									1.1993	1.49653	1.46328	1.47472				1.32301	1.35046	1.566				1.47274		1.43318	1.41962	1.41709				1.48775	0.973801
cell4.10	2	0.279788							135	1.40155				1.44741	1.48027			1.40863									0.98429	1.3911	1.5456	1.5398				1.40273	1.48056	1.477				1.59419		1.6237	1.48417	1.40054				1.46252	1.0418
cell4.11	2	0.238302							136	1.49739				1.54267	1.49344			1.4906									0.982655	1.1478	1.42267	1.54728				1.36932	1.52949	1.465				1.52649		1.52027	1.49367	1.49674				1.437	0.997291
cell5.1	2	0.807746							137	1.48103				1.55503	1.49955			1.36296									0.98102	1.40276	1.49995	1.55199				1.37012	1.39522	1.412				1.52639		1.47464	1.52648	1.41017				1.48572	0.993325
cell5.2	2	0.509515							138	1.43289				1.59977	1.44114			1.48391									1.33855	1.47163	1.52011	1.4162				1.41491	1.43163	1.484				1.49038		1.48416	1.59906	1.5019				1.54094	1.04829
cell5.3	2	0.318192							139	1.45128				1.49169	1.52804			1.4984									1.69609	1.44515	1.48217	1.53758				1.41667	1.593	1.478				1.47146		1.49213	1.47426	1.51377				1.599	0.993555
cell5.4	2	0.290156							140	1.44644				1.5384	1.61534			1.46678									1.55472	1.29827	1.43638	1.48654				1.37722	1.54323	1.427				1.48303		1.60687	1.44024	1.53947				1.5643	0.997238
cell5.5	2	0.251016							141	1.43696				1.62644	1.57796			1.45897									1.41336	1.15686	1.38033	1.42835				1.32733	1.52585	1.399				1.51865		1.56862	1.33242	1.50667				1.57443
cell5.6	2	0.53566							142	1.35655				1.49497	1.57309			1.50207									1.53477	1.31096	1.44611	1.49893				1.3473	1.62669	1.478				1.47848		1.50695	1.30109	1.4624				1.58823
cell5.7	2	0.287804							143	1.45232				1.50688	1.48628			1.47467									1.48097	1.68348	1.50713	1.42638				1.37486	1.52497	1.506				1.442		1.45353	1.29221	1.46731				1.6124
cell5.8	2	0.425196							144	1.40073				1.51981	1.58801			1.55818									1.42717	1.3417	1.42717	1.34599				1.33994	1.62882					1.464		1.43505	1.29068	1.44565				1.50973
cell5.9	2	0.282347							145	1.40722				1.5713	1.53117			1.52787									1.37337	0.98045	1.49969	1.76236				1.3106	1.3616					1.35739		1.34025	1.36762	1.32755				1.51827
cell5.10	2	0.243949							146	1.38258				1.51123	1.51429			1.55884									1.31957	1.84232	1.57911	1.59796				1.38791	1.52088					1.52457		1.39335	1.46033	1.43361				1.55454
cell5.11	2	0.227964							147	1.45447				1.4857	1.50517			1.69291									1.26577	1.71229	1.48903	1.39395				1.3756	1.48332					1.54137		1.32126	1.53539	1.48392				1.58712
cell5.12	2	0.295798							148	1.32863				1.37331	1.47196			1.5218									1.05184	1.11544	1.65922	1.45608				1.3477	1.51383					1.53285		1.40453	1.45192	1.46689				1.58976
cell6.1	2	0.521795							149	1.4245				1.5159	1.57485			1.6294									0.83791	1.33721	1.63984	1.4197				1.35046	1.52973					1.47925		1.48122	1.3566	1.51904				1.49598
cell6.2	2	0.116304							150	1.38131				1.52034	1.37813			1.74442									1.40352	1.23425	1.51321	1.56509				1.34665	1.4278					1.45737		1.43798	1.41928	1.44093				1.59598
cell6.3	2	0.220131							151	1.42139				1.51913	1.49864			1.63733									1.96912	1.15832	1.6056	1.51756				1.37769	1.46893													1.66642
cell6.4	2	0.188046							152	1.34195				1.43664	1.48335			1.59265									2.02196	1.22327	1.62846	1.51934				1.29872	1.4235													1.56528
cell6.5	2	0.175632							153	1.39771				1.52176	1.45632			1.62746									1.60736	1.32092	1.56563	1.70697				1.32691	1.51364													1.555
cell6.6	2	0.647036							154	1.40188				1.54206	1.40316			1.64743									1.19276	1.66903	1.50756	1.53165				1.34237	1.50664													1.57196
cell6.7	2	0.146147							155	1.29839				1.54454	1.45619			1.67218									1.28167	1.42344	1.53193	1.62559				1.35922	1.54809													1.59755
cell6.8	2	0.282388							156	1.44261				1.47303	1.44578			1.63564									1.37058	1.28075	1.53045	1.49347				1.36097	1.57116													1.56354
cell6.9	2	0.562352							157	1.39496				1.45213	1.32547			1.50525									1.92219	1.48616	1.49369	1.44932				1.32849	1.55356													1.50716
cell6.10	2	0.259335							158	1.58653				1.37541	1.40464			1.57105									1.26545	1.18241	1.48864					1.3939	1.44672													1.50333
cell6.11	2	0.35353							159	1.36791				1.31057	1.50997			1.49332									1.50167	1.0102	1.56594					1.31898	1.44366													1.61002
cell6.12	2	0.280787							160	1.42724				1.39489	1.53493			1.63006									1.73789	1.63849	1.51573					1.32438	1.50533													1.46882
cell6.13	2	0.447542							161					1.59959	1.4454			1.56069									1.97411	1.48827	1.48352						1.38819													1.66014
cell6.14	2	0.489747							162					1.46369	1.3979			1.4343									1.66093	1.54803	1.45104						1.50799													1.53022
cell6.15	2	0.313411							163					1.50188	1.39727			1.55368									1.60506	1.19531	1.37589						1.50365													1.51728
cell7.1	2	0.791195							164					1.44538	1.59468			1.52742									1.5492	1.25817	1.34245						1.51595													1.60849
cell7.2	2	0.87262							165					1.46667	1.54714			1.51848									1.46459	1.18183	1.39084						1.52801													1.55115
cell7.3	2	0.421745							166					1.5062	1.55555			1.46488									0.96046	1.1934	1.5671						1.55582
cell7.4	2	0.227339							167					1.51898	1.45949			1.48253									0.948433	1.31954	1.46387						1.45506
cell7.5	2	0.263853							168					1.57452	1.46656			1.55515									0.936407	1.07968	1.55507						1.63916
cell7.6	2	0.378298							169					1.63783	1.40767			1.47749									0.92438	1.09248	1.56405						1.58301
cell7.7	2	0.240237							170					1.45913	1.46196			1.47738									1.06612	1.5351	1.58195						1.4703
cell7.8	2	0.167857							171					1.37084	1.40469			1.52707									1.20786	1.13355	1.43197
cell7.9	2	0.193029							172					1.3538				1.50126									1.21574	1.62918	1.49309
cell7.10	2	0.232727							173					1.40633				1.54781									1.22361	1.06466	1.43496
cell7.11	2	0.217209							174					1.36055				1.5226									1.40129	1.03891	1.519
cell7.12	2	0.220465							175					1.39097				1.52694									2.06432	1.37913
cell7.13	2	0.229704							176					1.4804				1.42511									1.18831	1.29013
cell1.1	3	0.96095							177					1.60691				1.44095									1.41919	1.08637
cell1.2	3	0.813							178					1.60363				1.30545									1.30815	1.43787
cell1.3	3	0.517435							179					1.60804				1.32233									1.19711	1.35315
cell1.4	3	0.591411							180					1.54228				1.4865									1.39651	1.41703
cell1.5	3	0.284026							181					1.57759				1.60703									1.40657	1.5947
cell1.6	3	0.20946							182					1.50348				1.63676									1.41663	1.38968
cell1.7	3	0.203696							183					1.58131				1.65825									1.42669	1.37258
cell1.8	3	0.199878							184					1.5815				1.6642									1.45921	1.11078
cell1.9	3	0.314428							185					1.64731				1.51468									1.38038	0.92553
cell1.10	3	0.378217							186					1.52995				1.51701									1.51689	1.29683
cell1.11	3	0.228694							187					1.71212				1.53554									1.65339	1.26876
cell1.12	3	0.263281							188					1.63861				1.57533									1.42804	1.24068
cell1.13	3	0.173041							189					1.65641				1.53147									1.87259	1.03578
cell1.14	3	0.288283							190					1.50088				1.49433									1.87571	1.27109
cell1.15	3	0.22745							191					1.48119				1.35109									1.95556	1.41248
cell1.16	3	0.261537							192					1.53605				1.62416									2.03541	1.20288
cell1.17	3	0.155558							193					1.45297				1.53923									1.94824	1.27876
cell2.1	3	1.19238							194					1.54888				1.46808									1.86108	1.19087
cell2.2	3	0.585855							195					1.48033				1.5122									1.77391	1.02847
cell2.3	3	0.740735							196					1.45383				1.51677									1.95292	1.33194
cell2.4	3	0.41469							197					1.44799				1.41691									1.82994	1.20732
cell2.5	3	0.209148							198					1.48124				1.52991									1.70696	1.31764
cell2.6	3	0.281844							199					1.53605				1.45559									1.58398	1.03249
cell2.7	3	0.275057							200					1.52311				1.41346									1.58223	1.12592
cell3.1	3	0.617684							201					1.42629													1.58048	0.91777
cell3.2	3	0.539991							202					1.51512													1.57873	1.31224
cell3.3	3	0.443963							203					1.46742													1.57699	1.1193
cell3.4	3	0.409084							204					1.48128													1.57524	1.24108
cell3.5	3	0.581971							205					1.52014													1.57349	1.03759
cell3.6	3	0.201789							206					1.45879													1.57174	1.32984
cell3.7	3	0.622656							207					1.42519													1.56999	1.26149
cell3.8	3	0.175333							208					1.43065													1.61732	0.89966
cell3.9	3	0.402484							209					1.40651													1.66466	1.03815
cell3.10	3	0.266649							210					1.46058													1.71199	1.33547
cell3.11	3	0.314211							211					1.50131													1.75933	1.27216
cell3.12	3	0.283969							212					1.46843													1.80666	1.28209
cell3.13	3	0.297423							213					1.44739													1.78117	1.29203
cell4.1	3	1.03883							214					1.45905													1.75567	1.31567
cell4.2	3	1.07832							215					1.41537													1.66451	1.50543
cell4.3	3	0.406083							216					1.42781													1.57336	1.41914
cell4.4	3	0.522086							217					1.38598													1.4822	1.38583
cell4.5	3	0.29001							218					1.43847													1.39105	1.11063
cell4.6	3	0.194147							219					1.49094													1.3967	1.45162
cell4.7	3	0.292728							220					1.53121													1.40235	1.22663
cell4.8	3	0.372347							221					1.43131													1.35241	1.00164
cell4.9	3	0.299441							222					1.40021													1.30246	1.19286
cell4.10	3	0.263733							223					1.31831													1.25252	1.11234
cell4.11	3	0.274288							224					1.45521													1.20257	1.09713
cell5.1	3	0.781211							225					1.51457													1.34695	1.48699
cell5.2	3	0.55917							226					1.50811													1.49132	1.46997
cell5.3	3	0.349658							227					1.55291													1.4355	1.08148
cell5.4	3	0.295426							228					1.54884													1.37967	1.366
cell5.5	3	0.390735							229					1.52668													1.32385	1.39664
cell5.6	3	0.525265							230					1.56141														1.59073
cell5.7	3	0.331548							231					1.53388														1.53437
cell5.8	3	0.413033							232																			1.57546
cell5.9	3	0.250686							233																			1.61656
cell5.10	3	0.313059							234																			1.65765
cell5.11	3	0.24364							235																			1.69874
cell5.12	3	0.339717							236																			1.73984
cell6.1	3	0.471118							237																			1.78093
cell6.2	3	0.128233
cell6.3	3	0.156902
cell6.4	3	0.210687
cell6.5	3	0.233833
cell6.6	3	0.649002
cell6.7	3	0.153291
cell6.8	3	0.267645
cell6.9	3	0.636831
cell6.10	3	0.253741
cell6.11	3	0.36601
cell6.12	3	0.345677
cell6.13	3	0.421947
cell6.14	3	0.45973
cell6.15	3	0.266569
cell7.1	3	0.894272
cell7.2	3	0.88506
cell7.3	3	0.331323
cell7.4	3	0.237484
cell7.5	3	0.202188
cell7.6	3	0.419723
cell7.7	3	0.275587
cell7.8	3	0.197547
cell7.9	3	0.182342
cell7.10	3	0.271982
cell7.11	3	0.27552
cell7.12	3	0.211465
cell7.13	3	0.307617
cell1.1	4	0.91754
cell1.2	4	0.881
cell1.3	4	0.640866
cell1.4	4	0.808358
cell1.5	4	0.261579
cell1.6	4	0.242406
cell1.7	4	0.266085
cell1.8	4	0.126714
cell1.9	4	0.335916
cell1.10	4	0.434304
cell1.11	4	0.22047
cell1.12	4	0.245654
cell1.13	4	0.251481
cell1.14	4	0.294686
cell1.15	4	0.212439
cell1.16	4	0.302475
cell1.17	4	0.192249
cell2.1	4	1.31228
cell2.2	4	0.72888
cell2.3	4	0.639116
cell2.4	4	0.413628
cell2.5	4	0.171981
cell2.6	4	0.276305
cell2.7	4	0.307961
cell3.1	4	0.628891
cell3.2	4	0.589377
cell3.3	4	0.498953
cell3.4	4	0.2963
cell3.5	4	0.609871
cell3.6	4	0.235747
cell3.7	4	0.518764
cell3.8	4	0.176728
cell3.9	4	0.42958
cell3.10	4	0.297978
cell3.11	4	0.286704
cell3.12	4	0.233649
cell3.13	4	0.227192
cell4.1	4	0.99815
cell4.2	4	1.03058
cell4.3	4	0.484315
cell4.4	4	0.48515
cell4.5	4	0.367748
cell4.6	4	0.242449
cell4.7	4	0.410908
cell4.8	4	0.398072
cell4.9	4	0.317761
cell4.10	4	0.279735
cell4.11	4	0.306413
cell5.1	4	0.803738
cell5.2	4	0.559286
cell5.3	4	0.354579
cell5.4	4	0.300543
cell5.5	4	0.298364
cell5.6	4	0.547073
cell5.7	4	0.343789
cell5.8	4	0.491856
cell5.9	4	0.246697
cell5.10	4	0.257253
cell5.11	4	0.302179
cell5.12	4	0.424675
cell6.1	4	0.488645
cell6.2	4	0.174898
cell6.3	4	0.172314
cell6.4	4	0.213015
cell6.5	4	0.238149
cell6.6	4	0.589988
cell6.7	4	0.164036
cell6.8	4	0.321467
cell6.9	4	0.51871
cell6.10	4	0.240341
cell6.11	4	0.3377
cell6.12	4	0.354845
cell6.13	4	0.389245
cell6.14	4	0.497435
cell6.15	4	0.316121
cell7.1	4	0.653338
cell7.2	4	0.97758
cell7.3	4	0.508737
cell7.4	4	0.175555
cell7.5	4	0.230759
cell7.6	4	0.416224
cell7.7	4	0.251196
cell7.8	4	0.190718
cell7.9	4	0.214254
cell7.10	4	0.300784
cell7.11	4	0.350407
cell7.12	4	0.297141
cell7.13	4	0.244926
cell1.1	5	0.96629
cell1.2	5	0.792
cell1.3	5	0.785027
cell1.4	5	0.756345
cell1.5	5	0.277275
cell1.6	5	0.202829
cell1.7	5	0.303174
cell1.8	5	0.142388
cell1.9	5	0.352801
cell1.10	5	0.427853
cell1.11	5	0.248812
cell1.12	5	0.213399
cell1.13	5	0.20409
cell1.14	5	0.346357
cell1.15	5	0.32658
cell1.16	5	0.262333
cell1.17	5	0.209889
cell2.1	5	1.15707
cell2.2	5	0.71795
cell2.3	5	0.649297
cell2.4	5	0.404272
cell2.5	5	0.21747
cell2.6	5	0.222963
cell2.7	5	0.276494
cell3.1	5	0.629158
cell3.2	5	0.530193
cell3.3	5	0.458364
cell3.4	5	0.315084
cell3.5	5	0.614293
cell3.6	5	0.271688
cell3.7	5	0.416232
cell3.8	5	0.174409
cell3.9	5	0.287452
cell3.10	5	0.306852
cell3.11	5	0.234739
cell3.12	5	0.213553
cell3.13	5	0.286239
cell4.1	5	0.97963
cell4.2	5	0.85113
cell4.3	5	0.47781
cell4.4	5	0.50164
cell4.5	5	0.261809
cell4.6	5	0.222291
cell4.7	5	0.334032
cell4.8	5	0.370551
cell4.9	5	0.375892
cell4.10	5	0.276943
cell4.11	5	0.227587
cell5.1	5	0.817483
cell5.2	5	0.543255
cell5.3	5	0.403271
cell5.4	5	0.306219
cell5.5	5	0.246864
cell5.6	5	0.496432
cell5.7	5	0.32743
cell5.8	5	0.446613
cell5.9	5	0.273573
cell5.10	5	0.281216
cell5.11	5	0.29384
cell5.12	5	0.343535
cell6.1	5	0.557026
cell6.2	5	0.230309
cell6.3	5	0.233259
cell6.4	5	0.209278
cell6.5	5	0.281912
cell6.6	5	0.576279
cell6.7	5	0.166833
cell6.8	5	0.306724
cell6.9	5	0.444231
cell6.10	5	0.313921
cell6.11	5	0.36346
cell6.12	5	0.238025
cell6.13	5	0.414175
cell6.14	5	0.45467
cell6.15	5	0.367395
cell7.1	5	0.731704
cell7.2	5	0.89903
cell7.3	5	0.452071
cell7.4	5	0.20139
cell7.5	5	0.232632
cell7.6	5	0.416845
cell7.7	5	0.287119
cell7.8	5	0.183039
cell7.9	5	0.205992
cell7.10	5	0.281523
cell7.11	5	0.394946
cell7.12	5	0.296081
cell7.13	5	0.302454
[truncated: 48 more columns]

## Sheet: fig2-supp2C
ID	strain	series	cell #	top frame	top ratio	bottom frame	bottom ratio	recovery frame	recovery ratio	dT1	dT2	dQ1	dQ2	∆QUEEN ratio	dip duration(min)	Dynamics
1	wt	3	6	13	2.19985	14	1.38915	16	2.25313	1	2	-0.8107	0.86398	0.86398	12	dip
2	wt	1	11	25	2.06637	32	1.28559			7		-0.78078		0.78078		shift
3	snf1∆adk1∆	1	1	45	1.75786	46	0.82521	54	1.79443	1	8	-0.93265	0.96922	0.96922	36	dip
4	snf1∆adk1∆	1	1	89	1.6228	90	0.74401	92	1.75441	1	2	-0.87879	1.0104	1.0104	12	dip
5	snf1∆adk1∆	1	2	43	1.702	44	0.876	55	1.613	1	11	-0.826	0.737	0.826	48	dip
6	snf1∆adk1∆	1	3	10	1.69161	11	1.15762	16	1.94265	1	5	-0.533991	0.785027	0.785027	24	dip
7	snf1∆adk1∆	1	4	6	1.71134	7	0.986849	11	1.79521	1	4	-0.724492	0.808358	0.808358	20	dip
8	snf1∆adk1∆	1	4	20	1.55293	22	0.98945	27	1.55445	2	5	-0.563476	0.564996	0.564996	28	dip
9	snf1∆adk1∆	1	10	55	1.36435	57	1.32188	61	1.75619	2	4	-0.042466	0.434304	0.434304
10	snf1∆adk1∆	1	14	5	1.3794	8	1.09112	19	1.52047	3	11	-0.288283	0.42935	0.42935	56	dip (shallow)
11	snf1∆adk1∆	2	1	20	1.39578	22	1.03352			2		-0.36226		0.36226		shift
12	snf1∆adk1∆	2	2	1	1.64737	5	1.19937			4		-0.448		0.448		shift
13	snf1∆adk1∆	2	3	85	1.58037	87	0.903218	90	1.64395	2	3	-0.677153	0.740735	0.740735	20	dip
14	snf1∆adk1∆	2	3	90	1.64395	91	0.897731	93	1.60643	1	2	-0.746222	0.708697	0.746222	12	dip
15	snf1∆adk1∆	2	4	21	1.74281	23	1.2979	25	1.67973	2	2	-0.444916	0.381829	0.444916	16	dip (shallow)
16	snf1∆adk1∆	2	4	88	1.64106	90	1.2545	91	1.63212	2	1	-0.386554	0.377617	0.386554	12	dip (shallow)
17	snf1∆adk1∆	2	4	144	1.34599	145	1.76236	147	1.39395	1	2	0.416373	-0.368414	0.416373
18	snf1∆adk1∆	3	1	21	1.61183	22	0.933806	34	1.57298	1	12	-0.678026	0.63917	0.678026	52	dip
19	snf1∆adk1∆	3	2	91	1.63366	92	1.07621	95	1.59166	1	3	-0.557449	0.515449	0.557449	16	dip
20	snf1∆adk1∆	3	3	42	1.72823	46	1.22927	48	1.70057	4	2	-0.498953	0.471294	0.498953	24	dip (shallow)
21	snf1∆adk1∆	3	5	7	1.48405	8	0.994984	13	1.60928	1	5	-0.489062	0.614293	0.614293	24	dip
22	snf1∆adk1∆	3	7	110	1.63116	114	1.11239	117	1.73505	4	3	-0.518764	0.622656	0.622656	28	dip
23	snf1∆adk1∆	4	1	3	1.67368	4	0.73395	7	1.77278	1	3	-0.93973	1.03883	1.03883	16	dip
24	snf1∆adk1∆	4	2	46	1.8074	50	0.84435	53	1.92267	4	3	-0.96305	1.07832	1.07832	28	dip
25	snf1∆adk1∆	4	2	53	1.92267	57	1.17482	65	1.73437	4	8	-0.74785	0.55955	0.74785	48	dip
26	snf1∆adk1∆	4	3	15	1.45496	33	0.85888	48	1.52124	18	15	-0.596084	0.662357	0.662357	132	dip
27	snf1∆adk1∆	4	8	10	1.7874	11	1.45538	15	1.85346	1	4	-0.332013	0.398072	0.398072	20	dip (shallow)
28	snf1∆adk1∆	5	1	28	1.65525	30	1.21306	32	1.66864	2	2	-0.442192	0.455584	0.455584	16	dip (shallow)
29	snf1∆adk1∆	5	1	32	1.66864	34	0.860894	39	1.67838	2	5	-0.807746	0.817483	0.817483	28	dip
30	snf1∆adk1∆	5	2	64	1.55311	66	1.14002	71	1.60696	2	5	-0.413095	0.466945	0.466945	28	dip (shallow)
31	snf1∆adk1∆	5	4	81	1.69097	120	0.991839			39		-0.69913		0.69913		shift
32	snf1∆adk1∆	5	6	48	1.59661	67	1.13575	81	1.61095	19	14	-0.460865	0.475201	0.475201	132	dip (shallow)
33	snf1∆adk1∆	5	6	117	1.69676	121	1.14969	123	1.68535	4	2	-0.547073	0.53566	0.547073	24	dip
34	snf1∆adk1∆	5	8	37	1.56139	39	1.1362	43	1.62805	2	4	-0.425196	0.491856	0.491856	24	dip (shallow)
35	snf1∆adk1∆	6	1	33	1.66654	35	1.17796	37	1.69975	2	2	-0.48858	0.521795	0.521795	16	dip
36	snf1∆adk1∆	6	2	1	1.1647	18	0.787569			17		-0.377133		0.377133		shift
37	snf1∆adk1∆	6	6	36	1.69539	39	1.04639	43	1.62463	3	4	-0.649002	0.578245	0.649002	28	dip
38	snf1∆adk1∆	6	9	7	1.73039	10	1.19924	13	1.83607	3	3	-0.53115	0.636831	0.636831	24	dip
39	snf1∆adk1∆	6	13	25	1.52905	28	1.16771	31	1.44981	3	3	-0.36134	0.282096	0.36134	24	dip (shallow)
40	snf1∆adk1∆	6	13	45	1.51353	47	1.06599	49	1.43457	2	2	-0.447542	0.368577	0.447542	16	dip (shallow)
41	snf1∆adk1∆	6	14	21	1.50462	25	1.00719	27	1.49694	4	2	-0.497435	0.489747	0.497435	24	dip (shallow)
42	snf1∆adk1∆	6	14	48	1.38621	50	1.04807	51	1.21918	2	1	-0.338141	0.171114	0.338141	12	dip (shallow)
43	snf1∆adk1∆	6	14	62	1.4465	65	1.12319	68	1.45287	3	3	-0.323319	0.32968	0.32968
44	snf1∆adk1∆	7	1	88	1.7459	89	0.986737	92	1.88101	1	3	-0.759159	0.894272	0.894272	16	dip
45	snf1∆adk1∆	7	2	7	1.68007	10	0.79501	15	1.48415	3	5	-0.88506	0.68914	0.88506	32	dip
46	snf1∆adk1∆	7	6	61	1.52076	64	1.10104	65	1.46197	3	1	-0.419723	0.360932	0.419723	16	dip (shallow)
47	snf1∆adk1∆	7	11	11	1.49255	25	0.967245	35	1.4686	14	10	-0.525307	0.501354	0.525307	96	dip
48	snf1∆adk1∆	1	1	15	1.64111	16	0.80836			1		-0.83275		0.83275		shift
49	snf1∆adk1∆	1	2	1	1.32357	35	0.95986			34		-0.363709		0.363709		shift
50	snf1∆adk1∆	1	5	90	1.79878	98	1.28602	101	1.90768	8	3	-0.512754	0.621652	0.621652	44	dip
51	snf1∆adk1∆	2	1	40	1.42403	41	0.670225	43	1.37477	1	2	-0.7538	0.704544	0.7538	12	dip
52	snf1∆adk1∆	3	1	1	1.36771	7	0.888757			6		-0.478953		0.478953		shift
53	snf1∆adk1∆	3	2	116	1.10076	134	0.633946			18		-0.466815		0.466815		shift
54	snf1∆adk1∆	3	3	1	1.28037	19	0.900777			18		-0.379591		0.379591		shift
55	snf1∆adk1∆	3	7	36	1.39293	39	1.09065	40	1.4912	3	1	-0.302282	0.400551	0.400551	16	dip (shallow)
56	snf1∆adk1∆	3	9	8	1.47305	9	1.00994	11	1.42709	1	2	-0.463113	0.417146	0.463113	12	dip (shallow)
57	snf1∆adk1∆	4	1	116	1.41467	144	0.92463			28		-0.49004		0.49004		shift
58	snf1∆adk1∆	4	2	1	1.53711	33	0.87173			32		-0.66538		0.66538		shift
59	snf1∆adk1∆	4	3	78	1.23968	81	1.0388	85	1.28213	3	4	-0.200887	0.243329	0.243329
60	snf1∆adk1∆	5	1	30	1.28331	35	0.880947	38	1.34915	5	3	-0.402367	0.4682	0.4682	32	dip (shallow)
61	snf1∆adk1∆	5	1	68	1.25889	78	0.913236			10		-0.345657		0.345657		shift
62	snf1∆adk1∆	5	2	55	1.61984	71	0.981947			16		-0.637894		0.637894		shift
63	snf1∆adk1∆	5	3	13	1.52238	21	0.852039	23	1.53878	8	2	-0.670336	0.686744	0.686744	40	dip
64	snf1∆adk1∆	6	1	67	1.54032	70	0.888146	73	1.60099	3	3	-0.652178	0.712844	0.712844	24	dip
65	snf1∆adk1∆	6	1	37	1.57743	38	0.822056	43	1.63741	1	5	-0.755374	0.815352	0.815352	24	dip
66	snf1∆adk1∆	6	1	54	1.75577	59	0.791486	61	1.72569	5	2	-0.964287	0.934207	0.964287	28	dip
67	snf1∆adk1∆	6	2	36	1.60348	46	0.975378	51	1.58474	10	5	-0.6281	0.60936	0.6281	60	dip
68	snf1∆adk1∆	6	3	1	1.20225	38	0.80026			37		-0.401992		0.401992		shift
69	snf1∆adk1∆	7	1	69	1.5027	71	0.9472	79	1.50918	2	8	-0.555505	0.561981	0.561981	40	dip
70	snf1∆adk1∆	7	2	2	1.42036	52	0.814406	62	1.44155	50	10	-0.605953	0.627143	0.627143	240	dip
71	snf1∆adk1∆	7	2	62	1.44155	78	0.710854			16		-0.730695		0.730695		shift
72	snf1∆adk1∆	7	5	9	1.52812	13	0.983847	15	1.49738	4	2	-0.54427	0.513531	0.54427	24	dip
73	snf1∆adk1∆	8	1	14	1.57331	16	0.976684	29	1.47792	2	13	-0.596626	0.501237	0.596626	60	dip
74	snf1∆adk1∆	8	1	180	1.4984	182	0.807084	197	1.38226	2	15	-0.69132	0.575176	0.69132	68	dip
75	snf1∆adk1∆	8	2	1	1.46527	3	0.944752	6	1.57192	2	3	-0.520519	0.627167	0.627167	20	dip
76	snf1∆adk1∆	8	4	62	1.52381	78	1.21817	90	1.54621	16	12	-0.305641	0.328036	0.328036
77	snf1∆adk1∆	1	3	7	1.97508	11	1.5529	18	1.85156	4	7	-0.422176	0.298658	0.422176	44	dip (shallow)
78	snf1∆adk1∆	1	4	11	1.54369	12	1.3812	15	1.71452	1	3	-0.162488	0.33332	0.33332
79	snf1∆adk1∆	1	8	6	1.87647	8	1.17996	15	1.73376	2	7	-0.696508	0.553799	0.696508	36	dip
80	snf1∆adk1∆	1	8	15	1.73376	19	1.14408	26	1.63677	4	7	-0.589677	0.492687	0.589677	44	dip
81	snf1∆adk1∆	2	1	4	1.86933	15	1.08951	24	1.67952	11	9	-0.77982	0.59001	0.77982	80	dip
82	snf1∆adk1∆	2	1	24	1.67952	36	1.06755			12		-0.61197		0.61197		shift
83	snf1∆adk1∆	2	2	70	1.97032	77	1.55741	85	2.23056	7	8	-0.412912	0.67315	0.67315	60	dip
84	snf1∆adk1∆	2	5	16	2.221	19	1.74672	21	2.33377	3	2	-0.474286	0.587051	0.587051	20	dip
85	snf1∆adk1∆	3	2	10	1.88258	14	1.41949			4		-0.463095		0.463095		shift
86	snf1∆adk1∆	3	4	94	1.93218	97	1.58018	106	1.82465	3	9	-0.351992	0.244461	0.351992	48	dip (shallow)
87	snf1∆adk1∆	3	6	19	1.80648	21	1.29737	32	1.86566	2	11	-0.50911	0.56829	0.56829	52	dip
88	snf1∆adk1∆	4	1	20	1.47863	22	1.12197	24	1.5382	2	2	-0.356668	0.416233	0.416233	16	dip (shallow)
89	snf1∆adk1∆	4	2	147	1.97389	154	1.35871	158	2.25214	7	4	-0.61518	0.89343	0.89343	44	dip
90	snf1∆adk1∆	4	4	38	1.80133	68	1.33133	84	1.58036	30	16	-0.469997	0.249027	0.469997	184	dip (shallow)
91	snf1∆adk1∆	4	5	14	1.84637	15	1.39736	16	1.83197	1	1	-0.449007	0.434608	0.449007
92	snf1∆adk1∆	4	14	12	1.95128	15	1.48106			3		-0.470217		0.470217		shift
93	snf1∆adk1∆	5	5	10	2.14256	13	1.23599			3		-0.906575		0.906575		shift
94	snf1∆adk1∆	5	12	10	1.775	12	1.027	14	1.765	2	2	-0.748	0.738	0.748	16	dip
95	snf1∆adk1∆	5	14	5	1.72636	18	1.15466	20	1.66178	13	2	-0.571696	0.50712	0.571696	60	dip
96	snf1∆adk1∆	5	15	10	2.09151	13	1.3597	16	1.62116	3	3	-0.731814	0.261464	0.731814	24	dip
97	snf1∆adk1∆	6	1	3	1.80312	6	1.02666			3		-0.776461		0.776461		shift
98	snf1∆adk1∆	6	3	7	2.2276	11	1.18302			4		-1.04458		1.04458		shift
99	snf1∆adk1∆	6	6	46	1.05411	57	1.84844			11		0.794338		0.794338		shift
100	snf1∆adk1∆	6	6	86	1.78988	102	1.1281			16		-0.66178		0.66178		shift
101	snf1∆adk1∆	7	2	6	2.18604	10	1.19467	11	1.80844	4	1	-0.991365	0.613769	0.991365	20	dip
102	snf1∆adk1∆	7	5	163	2.29313	168	1.13258	173	2.13715	5	5	-1.16055	1.00457	1.16055	40	dip
103	snf1∆adk1∆	7	5	173	2.13715	176	1.45404	183	2.09354	3	7	-0.68311	0.6395	0.68311	40	dip
104	snf1∆adk1∆	7	6	5	1.96295	6	1.18941			1		-0.773539		0.773539		shift
105	snf1∆adk1∆	8	1	104	2.30178	108	1.63612	111	2.29566	4	3	-0.665657	0.65954	0.665657	28	dip
106	snf1∆adk1∆	8	1	114	2.28433	126	1.73106	135	2.36129	12	9	-0.553272	0.630225	0.630225	84	dip
107	snf1∆adk1∆	8	5	5	2.26589	9	1.38991	29	1.7175	4	20	-0.87598	0.32759	0.87598	96	dip
