# Supplementary material for: High and stable ATP levels prevent aberrant intracellular protein aggregation in yeast
Source: eLife. 2022 Apr 19;11:e67659. doi: 10.7554/eLife.67659 (PMC9018071; doi:10.7554/eLife.67659)
Supplement: Figure 2—figure supplement 3—source data 1. [file elife-67659-fig2-figsupp3-data1.xlsx]

## Sheet: fig2-supp3A
	[ATP] (mM)
Time (min)	cell1	cell2
0	1.99286	1.67518
3	1.71093	1.86735
6	1.1265	1.84899
9	0.650678	1.75265
12	0.290717	1.26302
15	0.049006	0.695569
18	0.487892	0.614263
21	0.639468	0.313764
24	0.888108	0.459202
27	0.77404	0.466002
30	0.983337	0.648161
33	1.04589	0.918567
36	1.0334	1.06559
39	0.777308	1.04836
42	0.33877	1.40096
45	0.197984	1.28273
48	-0.124084	1.07101
51	-0.362329	0.751004
54	0.0432976	0.68344
57	0.354611	0.249583
60	0.850276	0.127234
63	1.19805	0.0197655
66	1.30342	0.12318
69	1.54937	0.392542
72	1.04605	0.604611
75	0.699854	0.925191
78	0.25331	1.10739
81	0.0204387	1.34267
84	-0.0936905	1.29443
87	0.0187836	0.994979
90	0.391841	0.899738
93	0.798498	0.36582
96	1.19247	0.0214115
99	1.23408	-0.0202916
102	1.40673	0.186709
105	1.20701	0.413403
108	0.610787	0.646888
111	0.662447	1.03994
114	-0.0655871	1.07769
117	0.0283626	0.938999
120	0.207284	0.846071
123	0.442851	0.522406
126	0.776314	0.20181
129	1.00736	-0.0457116
132	1.21489	0.189655
135	0.995668	0.483355
138	0.725109	0.608803
141	0.5189	1.00121
144	0.355418	1.28044
147	0.148802	1.35045
150	0.0998586	0.973822
153	0.0504837	0.858589
156	0.556041	0.612157
159	0.842094	0.468851
162	1.10037	0.226883
165	1.19129	0.294133
168	1.14685	0.720544
171	0.899339	0.591158
174	0.842027	0.998791
177	0.427698	1.14136
180	-0.096832	0.695459
183	0.00695509	1.19257
186	0.0477542	0.868569
189	0.0497151	0.589946
192	0.523141	1.03312
195	0.56847	0.672735
198	0.923604	0.833427
201	0.962519	0.623717
204	0.988011	0.657935
207	0.97368	0.991246
210	0.603905	1.15439
213	0.308068	1.05646
216	-0.0804243	0.999265
219	0.0336202	1.02598
222	0.225535	0.62449
225	0.424691	0.874225
228	0.752727	0.913626
231	0.686902	0.712809
234	1.08601	1.04851
237	1.09132	0.97036
240	1.02425	1.05928
243	0.663674	1.18223
246	0.138969	1.29489
249	0.0534312	1.22035
252	0.010528	1.02613
255	0.239048	1.24431
258	0.447582	1.36795
261	0.390243	0.975519
264	0.634577	1.24653
267	0.807336	1.52128
270	0.651514	1.47834
273	0.708336	1.59547
276	0.464661	1.5309
279	0.235102	1.59723
282	-0.0585488	1.02824
285	-0.0159549	0.946573
288	-0.0301189	0.912055
291	0.119439	0.426191
294	0.54602	0.25826
297	0.573804	0.06051
300	0.722707	0.135828
303	0.678237	-0.0109393
306	0.639408	-0.0809671
309	0.577481	0.306139
312	0.399582	0.530375
315	0.323901	0.650286
318	-0.0736842	0.50506
321	0.451086	0.764307
324	0.482702	0.446302
327	0.713048	0.364115
330	0.312364	0.10857
333		0.240377
336	0.0796963	0.350219
339	-0.407094	0.524127
342	0.106875	0.828771
345	0.542126	0.916492
348	1.02561	1.13971
351	0.444745	1.08639
354	0.277627	0.890557
357	0.353431	0.504575
360	-0.202766	0.141392

## Sheet: fig2-supp3B
	lag	correlation coefficient
	0	1
	1	0.807857
	2	0.514958
	3	0.167384
	4	-0.146627
	5	-0.375682
	6	-0.425962
	7	-0.295676
	8	-0.0398794
	9	0.243029
	10	0.496123
	11	0.624574
	12	0.542839
	13	0.33527
	14	0.0785142
	15	-0.18636
	16	-0.398822
	17	-0.455162
	18	-0.365546
	19	-0.183111
	20	0.0503354
	21	0.26452
	22	0.360085
	23	0.329845
	24	0.193172
	25	0.0217236
