# Supplementary material for: High and stable ATP levels prevent aberrant intracellular protein aggregation in yeast
Source: eLife. 2022 Apr 19;11:e67659. doi: 10.7554/eLife.67659 (PMC9018071; doi:10.7554/eLife.67659)
Supplement: Figure 2—source data 1. [file elife-67659-fig2-data1.xlsx]

## Sheet: fig2B
Time (min)	ATP (mM)
0	4.4379
4	4.29367
8	4.31128
12	4.79107
16	4.69421
20	4.01121
24	3.93908
28	3.94487
32	3.74804
36	3.84249
40	4.26114
44	3.96619
48	3.33458
52	3.5953
56	4.35766
60	4.0908
64	4.18618
68	4.64393
72	4.05034
76	4.29433
80	5.1782
84	4.1475
88	4.28064
92	4.29958
96	3.97736
100	4.39402
104	4.60415
108	4.35386
112	4.48051
116	4.53815
120	4.56992
124	3.95386
128	4.43883
132	4.07108
136	3.98636
140	3.90028
144	4.35897
148	3.89372
152	3.44814
156	4.05983
160	3.4439
164	3.64248
168	3.69044
172	4.24316
176	4.14395
180	4.35514
184	3.40707
188	4.1856
192	4.0028
196	3.70756
200	4.34901
204	4.39752
208	4.12396
212	3.93443
216	4.10814
220	4.28931
224	3.73758
228	4.12575
232	3.88414
236	4.27561
240	4.08147
244	4.07069
248	4.76022
252	3.39129
256	4.40369
260	3.73147
264	3.85118
268	3.71819
272	3.95032
276	3.97108

## Sheet: fig2D
Time (min)	ATP (mM)
0	2.11262
4	2.07837
8	2.07586
12	2.2683
16	2.28911
20	2.14173
24	2.38211
28	2.54361
32	2.3054
36	2.3009
40	1.8614
44	2.34571
48	1.88874
52	1.90373
56	1.80245
60	1.85157
64	1.91217
68	2.0274
72	1.84099
76	1.98174
80	1.90875
84	2.10401
88	1.73829
92	2.09248
96	2.01659
100	2.19558
104	2.28134
108	2.2813
112	1.73343
116	1.14776
120	2.12468
124	2.31953
128	2.19383
132	0.141475
136	0.238455
140	1.56335
144	2.20308
148	2.30806
152	2.34752
156	1.87137
160	2.2453
164	2.17997
168	1.94113
172	2.05971
176	2.1115
180	2.29847
184	2.03148
188	2.12231
192	2.08702
196	2.28436
200	2.28228
204	1.96541
208	2.09771
212	2.18552
216	2.35509
220	1.98396
224	1.92326
228	1.92682
232	2.00873
236	2.06274
240	1.89484
244	1.84752
248	2.153
252	1.96494
256	2.04818
260	2.14302
264	2.22709
268	2.1787
272	2.03224
276	1.91235
280	1.84855
284	2.07886
288	1.57065
292	1.64384
296	1.84142
300	1.60551
304	1.62286
308	1.6131
312	1.69584
316	1.77762
320	2.0084
324	1.76866
328	1.97131
332	2.04392
336	2.10187
340	1.91366
344	2.0015
348	1.97681
352	1.89912
356	2.00932
360	1.91253
364	1.95345
368	1.9759
372	1.96165
376	1.78803
380	1.42824

## Sheet: fig2E
Time (min)	ATP (mM)
0	1.90089
4	1.85321
8	1.79113
12	2.03023
16	1.96792
20	2.1703
24	2.15623
28	2.10546
32	2.45952
36	1.96837
40	2.43668
44	2.78637
48	2.53715
52	2.89915
56	2.75795
60	2.65169
64	2.52573
68	2.62715
72	2.83829
76	2.80299
80	2.82156
84	2.97495
88	2.82013
92	3.18018
96	3.50334
100	2.91775
104	2.69194
108	2.41402
112	2.35716
116	2.94394
120	2.86576
124	2.14645
128	2.30949
132	2.95965
136	2.44769
140	2.58006
144	2.87972
148	2.56421
152	2.54431
156	2.77708
160	2.66386
164	2.36604
168	2.12314
172	2.60445
176	2.58196
180	0.00125102
184	0.444447
188	0.403748
192	0.874074
196	1.05507
200	0.767067
204	1.49205
208	2.2996
212	2.69358
216	2.52693
220	2.34669
224	2.15625
228	1.92219
232	2.05082
236	1.80631
240	1.85948
244	2.01216
248	2.07411
252	2.25702
256	2.28501
260	1.98629
264	2.17334
268	2.51237
272	2.58227
276	2.29994
280	1.71849
284	1.68518
288	2.43559
292	2.524
296	2.80459
300	2.54892
304	2.49267
308	2.41072
312	2.90185
316	2.40667
320	2.28771
324	2.33529
328	2.188
332	2.23894
336	2.36578
340	2.25682
344	2.04239
348	2.15204
352	2.18987
356	-0.369248
360	1.44659
364	2.57156
368	2.42472
372	2.29926
376	2.44038
380	2.03437
384	1.9397
388	1.93657
392	1.8212
396	2.07867
400	1.98771
404	1.89126
408	2.02194
412	1.96568
416	2.00731
420	2.2034
424	2.20477
428	2.09806
432	1.99047
436	2.15104
440	1.87051
444	1.79964
448	1.92132
452	1.92952
456	1.80269
460	1.97957
464	1.87968
468	1.98423
472	1.76065
476	1.6892
480	1.79201
484	1.73926
488	1.62724
492	1.4804
496	1.62927
500	1.48921
504	1.92627
508	1.91582
512	1.89602
516	1.74859
520	1.83873
524	1.6957
528	1.7388
532	2.04328
536	1.60727
540	1.85157
544	1.80908
548	1.68599
552	1.73268
556	1.72035
560	1.69629
564	1.49591
568	1.73533
572	1.60523
576	1.62144
580	1.56011
584	1.74082
588	1.42761
592	1.66481
596	1.55696
600	1.65698
604	1.46013
608	1.5977
612	1.6081
616	1.35414
620	1.71062
624	1.59085
628	2.08962
632	1.52386
636	1.67172

## Sheet: fig2F
								ID	strain	series	cell #	stable	shift	dip (deep)	dip (shallow)	start frame
	strain	stable	shift	dip (shallow)	dip (deep)	cell counted		1	wt	1	1	1				1
	wt	136	1		1	138		2	wt	1	2	1				1
	snf1∆adk1∆	153	26	22	41	236		3	wt	1	3	1				94
								4	wt	1	4	1				66
								5	wt	2	1	1				1
								6	wt	2	2	1				18
								7	wt	2	3	1				46
								8	wt	2	4	1				1
								9	wt	2	5	1				96
								10	wt	3	1	1				29
								11	wt	3	2	1				1
								12	wt	3	3	1				1
								13	wt	3	4	1				30
								14	wt	3	5	1				30
								15	wt	3	6			1		24
								16	wt	4	1	1				1
								17	wt	4	2	1				1
								18	wt	4	3	1				30
								19	wt	4	4	1				56
								20	wt	4	5	1				73
								21	wt	4	6	1				72
								22	wt	4	7	1				110
								23	wt	5	1	1				1
								24	wt	5	2	1				34
								25	wt	5	3	1				102
								26	wt	5	4	1				111
								27	wt	6	1	1				1
								28	wt	6	2	1				103
								29	wt	6	3	1				60
								30	wt	6	4	1				104
								31	wt	6	5	1				138
								32	wt	6	6	1				138
								33	wt	7	1	1				1
								34	wt	7	2	1				1
								35	wt	8	1	1				1
								36	wt	8	2	1				1
								37	wt	8	3	1				1
								38	wt	8	4	1				1
								39	wt	8	5	1				1
								40	wt	1	1	1				1
								41	wt	1	2	1				1
								42	wt	1	3	1				3
								43	wt	1	4	1				91
								44	wt	1	5	1				121
								45	wt	1	6	1				124
								46	wt	1	7	1				124
								47	wt	1	8	1				126
								48	wt	2	1	1				1
								49	wt	2	2	1				1
								50	wt	2	3	1				1
								51	wt	2	4	1				95
								52	wt	3	1	1				1
								53	wt	3	2	1				1
								54	wt	3	3	1				61
								55	wt	3	4	1				61
								56	wt	3	5	1				104
								57	wt	4	1	1				1
								58	wt	4	2	1				1
								59	wt	5	1	1				1
								60	wt	5	2	1				1
								61	wt	5	3	1				55
								62	wt	5	4	1				99
								63	wt	5	5	1				107
								64	wt	5	6	1				137
								65	wt	6	1	1				1
								66	wt	6	2	1				1
								67	wt	6	3	1				98
								68	wt	6	4	1				124
								69	wt	7	1	1				1
								70	wt	7	2	1				1
								71	wt	7	3	1				1
								72	wt	7	4	1				50
								73	wt	7	5	1				49
								74	wt	7	6	1				110
								75	wt	8	1	1				1
								76	wt	8	2	1				15
								77	wt	8	3	1				1
								78	wt	8	4	1				1
								79	wt	8	5	1				48
								80	wt	8	6	1				93
								81	snf1∆adk1∆	1	1			2		1
								82	snf1∆adk1∆	1	2			1		93
								83	snf1∆adk1∆	1	3			1		166
								84	snf1∆adk1∆	1	4			2		175
								85	snf1∆adk1∆	1	5	1				1
								86	snf1∆adk1∆	1	6	1				61
								87	snf1∆adk1∆	1	7	1				1
								88	snf1∆adk1∆	1	8	1				1
								89	snf1∆adk1∆	1	9	1				1
								90	snf1∆adk1∆	1	10	1				84
								91	snf1∆adk1∆	1	11	1				104
								92	snf1∆adk1∆	1	12	1				57
								93	snf1∆adk1∆	1	13	1				57
								94	snf1∆adk1∆	1	14				1	106
								95	snf1∆adk1∆	1	15	1				126
								96	snf1∆adk1∆	1	16	1				146
								97	snf1∆adk1∆	1	17	1				146
								98	snf1∆adk1∆	2	1		1			1
								99	snf1∆adk1∆	2	2		1			1
								100	snf1∆adk1∆	2	3			2		147
								101	snf1∆adk1∆	2	4				2	74
								102	snf1∆adk1∆	2	5	1				113
								103	snf1∆adk1∆	2	6	1				158
								104	snf1∆adk1∆	2	7	1				136
								105	snf1∆adk1∆	3	1			1		1
								106	snf1∆adk1∆	3	2			1		1
								107	snf1∆adk1∆	3	3				1	88
								108	snf1∆adk1∆	3	4	1				168
								109	snf1∆adk1∆	3	5			1		83
								110	snf1∆adk1∆	3	6	1				83
								111	snf1∆adk1∆	3	7			1		1
								112	snf1∆adk1∆	3	8	1				71
								113	snf1∆adk1∆	3	9	1				1
								114	snf1∆adk1∆	3	10	1				1
								115	snf1∆adk1∆	3	11	1				1
								116	snf1∆adk1∆	3	12	1				87
								117	snf1∆adk1∆	3	13	1				105
								118	snf1∆adk1∆	4	1			1		1
								119	snf1∆adk1∆	4	2			1	1	1
								120	snf1∆adk1∆	4	3			1		1
								121	snf1∆adk1∆	4	4	1				1
								122	snf1∆adk1∆	4	5	1				42
								123	snf1∆adk1∆	4	6	1				41
								124	snf1∆adk1∆	4	7	1				63
								125	snf1∆adk1∆	4	8				1	77
								126	snf1∆adk1∆	4	9	1				88
								127	snf1∆adk1∆	4	10	1				86
								128	snf1∆adk1∆	4	11	1				117
								129	snf1∆adk1∆	5	1			1	1	133
								130	snf1∆adk1∆	5	2			1		104
								131	snf1∆adk1∆	5	3	1				1
								132	snf1∆adk1∆	5	4		1			47
								133	snf1∆adk1∆	5	5	1				63
								134	snf1∆adk1∆	5	6				2	70
								135	snf1∆adk1∆	5	7	1				84
								136	snf1∆adk1∆	5	8				1	140
								137	snf1∆adk1∆	5	9	1				119
								138	snf1∆adk1∆	5	10	1				143
								139	snf1∆adk1∆	5	11	1				1
								140	snf1∆adk1∆	5	12	1				114
								141	snf1∆adk1∆	6	1			1		50
								142	snf1∆adk1∆	6	2		1			1
								143	snf1∆adk1∆	6	3	1				1
								144	snf1∆adk1∆	6	4	1				30
								145	snf1∆adk1∆	6	5	1				1
								146	snf1∆adk1∆	6	6			1		70
								147	snf1∆adk1∆	6	7	1				1
								148	snf1∆adk1∆	6	8	1				50
								149	snf1∆adk1∆	6	9				1	50
								150	snf1∆adk1∆	6	10	1				77
								151	snf1∆adk1∆	6	11	1				109
								152	snf1∆adk1∆	6	12	1				109
								153	snf1∆adk1∆	6	13			2		92
								154	snf1∆adk1∆	6	14			1	1	137
								155	snf1∆adk1∆	6	15	1				138
								156	snf1∆adk1∆	7	1			1		1
								157	snf1∆adk1∆	7	2			1		180
								158	snf1∆adk1∆	7	3	1				1
								159	snf1∆adk1∆	7	4	1				38
								160	snf1∆adk1∆	7	5	1				50
								161	snf1∆adk1∆	7	6				1	121
								162	snf1∆adk1∆	7	7	1				45
								163	snf1∆adk1∆	7	8	1				94
								164	snf1∆adk1∆	7	9	1				72
								165	snf1∆adk1∆	7	10	1				99
								166	snf1∆adk1∆	7	11			1		149
								167	snf1∆adk1∆	7	12	1				110
								168	snf1∆adk1∆	7	13	1				138
								169	snf1∆adk1∆	1	1		1			1
								170	snf1∆adk1∆	1	2		1			1
								171	snf1∆adk1∆	1	3	1				1
								172	snf1∆adk1∆	1	4	1				1
								173	snf1∆adk1∆	1	5				1	88
								174	snf1∆adk1∆	1	6	1				98
								175	snf1∆adk1∆	1	7	1				139
								176	snf1∆adk1∆	1	8	1				123
								177	snf1∆adk1∆	2	1			1		1
								178	snf1∆adk1∆	2	2		1			1
								179	snf1∆adk1∆	2	3		1			1
								180	snf1∆adk1∆	2	4		1			1
								181	snf1∆adk1∆	2	5	1				54
								182	snf1∆adk1∆	2	6	1				89
								183	snf1∆adk1∆	2	7	1				38
								184	snf1∆adk1∆	2	8	1				109
								185	snf1∆adk1∆	2	9	1				109
								186	snf1∆adk1∆	2	10	1				1
								187	snf1∆adk1∆	3	1		1			1
								188	snf1∆adk1∆	3	2		1			1
								189	snf1∆adk1∆	3	3		1			1
								190	snf1∆adk1∆	3	4	1				1
								191	snf1∆adk1∆	3	5	1				1
								192	snf1∆adk1∆	3	6	1				1
								193	snf1∆adk1∆	3	7				1	58
								194	snf1∆adk1∆	3	8	1				120
								195	snf1∆adk1∆	3	9				1	83
								196	snf1∆adk1∆	3	10	1				110
								197	snf1∆adk1∆	3	11	1				152
								198	snf1∆adk1∆	3	12	1				120
								199	snf1∆adk1∆	3	13	1				133
								200	snf1∆adk1∆	3	14	1				147
								201	snf1∆adk1∆	3	15	1				142
								202	snf1∆adk1∆	4	1		1			1
								203	snf1∆adk1∆	4	2		1			1
								204	snf1∆adk1∆	4	3	1				60
								205	snf1∆adk1∆	4	4	1				102
								206	snf1∆adk1∆	4	5	1				102
								207	snf1∆adk1∆	4	6	1				118
								208	snf1∆adk1∆	5	1		1	1		1
								209	snf1∆adk1∆	5	2		1			1
								210	snf1∆adk1∆	5	3			1		175
								211	snf1∆adk1∆	5	4	1				46
								212	snf1∆adk1∆	6	1			3		36
								213	snf1∆adk1∆	6	2			1		126
								214	snf1∆adk1∆	6	3		1			1
								215	snf1∆adk1∆	6	4	1				1
								216	snf1∆adk1∆	6	5	1				116
								217	snf1∆adk1∆	6	6	1				126
								218	snf1∆adk1∆	6	7	1				136
								219	snf1∆adk1∆	7	1			1		118
								220	snf1∆adk1∆	7	2		1	1		1
								221	snf1∆adk1∆	7	3					1
								222	snf1∆adk1∆	7	4	1				43
								223	snf1∆adk1∆	7	5			1		93
								224	snf1∆adk1∆	7	6	1				93
								225	snf1∆adk1∆	7	7	1				84
								226	snf1∆adk1∆	7	8	1				1
								227	snf1∆adk1∆	8	1			2		1
								228	snf1∆adk1∆	8	2			1		135
								229	snf1∆adk1∆	8	3	1				1
								230	snf1∆adk1∆	8	4	1				101
								231	snf1∆adk1∆	8	5	1				119
								232	snf1∆adk1∆	8	6	1				119
								233	snf1∆adk1∆	8	7	1				122
								234	snf1∆adk1∆	8	8	1				115
								235	snf1∆adk1∆	8	9	1				153
								236	snf1∆adk1∆	8	10	1				137
								237	wt	1	1	1				2
								238	wt	1	2	1				2
								239	wt	1	3	1				48
								240	wt	1	4	1				47
								241	wt	1	5	1				62
								242	wt	1	6	1				71
								243	wt	1	7	1				107
								244	wt	1	8	1				6
								245	wt	1	9	1				92
								246	wt	1	10	1				92
								247	wt	1	11		1			100
								248	wt	2	1	1				1
								249	wt	2	2	1				46
								250	wt	2	3	1				47
								251	wt	2	4	1				63
								252	wt	2	5	1				73
								253	wt	2	6	1				86
								254	wt	2	7	1				97
								255	wt	2	8	1				89
								256	wt	3	1	1				1
								257	wt	3	2	1				1
								258	wt	3	3	1				56
								259	wt	3	4	1				62
								260	wt	3	5	1				88
								261	wt	4	1	1				1
								262	wt	4	2	1				1
								263	wt	4	3	1				17
								264	wt	4	4	1				17
								265	wt	4	5	1				50
								266	wt	4	6	1				61
								267	wt	4	7	1				95
								268	wt	5	1	1				1
								269	wt	5	2	1				1
								270	wt	5	3	1				52
								271	wt	5	4	1				93
								272	wt	5	5	1				103
								273	wt	5	6	1				37
								274	wt	6	1	1				1
								275	wt	6	2	1				1
								276	wt	6	3	1				64
								277	wt	6	4	1				86
								278	wt	6	5	1				112
								279	wt	6	6	1				43
								280	wt	6	7	1				109
								281	wt	7	1	1				1
								282	wt	7	2	1				1
								283	wt	7	3	1				30
								284	wt	7	4	1				29
								285	wt	7	5	1				53
								286	wt	7	6	1				74
								287	wt	7	7	1				87
								288	wt	7	8	1				85
								289	wt	8	1	1				1
								290	wt	8	2	1				1
								291	wt	8	3	1				1
								292	wt	8	4	1				1
								293	wt	8	5	1				58
								294	wt	8	6	1				80
								295	snf1∆adk1∆	1	1	1				1
								296	snf1∆adk1∆	1	2	1				1
								297	snf1∆adk1∆	1	3				1	27
								298	snf1∆adk1∆	1	4	1				1
								299	snf1∆adk1∆	1	5	1				1
								300	snf1∆adk1∆	1	6	1				1
								301	snf1∆adk1∆	1	7	1				1
								302	snf1∆adk1∆	1	8			1	1	7
								303	snf1∆adk1∆	1	9	1				72
								304	snf1∆adk1∆	1	10	1				156
								305	snf1∆adk1∆	2	1		1	1		1
								306	snf1∆adk1∆	2	2				1	1
								307	snf1∆adk1∆	2	3	1				1
								308	snf1∆adk1∆	2	4	1				129
								309	snf1∆adk1∆	2	5				1	1
								310	snf1∆adk1∆	2	6	1				37
								311	snf1∆adk1∆	3	1	1				1
								312	snf1∆adk1∆	3	2		1			172
								313	snf1∆adk1∆	3	3	1				1
								314	snf1∆adk1∆	3	4				1	1
								315	snf1∆adk1∆	3	5	1				1
								316	snf1∆adk1∆	3	6				1	115
								317	snf1∆adk1∆	3	7	1				83
								318	snf1∆adk1∆	3	8	1				101
								319	snf1∆adk1∆	3	9	1				132
								320	snf1∆adk1∆	3	10	1				151
								321	snf1∆adk1∆	3	11	1				1
								322	snf1∆adk1∆	3	12	1				1
								323	snf1∆adk1∆	4	1			1		1
								324	snf1∆adk1∆	4	2			1		1
								325	snf1∆adk1∆	4	3	1				1
								326	snf1∆adk1∆	4	4				1	100
								327	snf1∆adk1∆	4	5	1				1
								328	snf1∆adk1∆	4	6	1				1
								329	snf1∆adk1∆	4	7	1				47
								330	snf1∆adk1∆	4	8	1				85
								331	snf1∆adk1∆	4	9	1				100
								332	snf1∆adk1∆	4	10	1				47
								333	snf1∆adk1∆	4	11	1				1
								334	snf1∆adk1∆	4	12	1				139
								335	snf1∆adk1∆	4	13	1				98
								336	snf1∆adk1∆	4	14		1			190
								337	snf1∆adk1∆	5	1	1				1
								338	snf1∆adk1∆	5	2	1				1
								339	snf1∆adk1∆	5	3	1				1
								340	snf1∆adk1∆	5	4	1				61
								341	snf1∆adk1∆	5	5		1			1
								342	snf1∆adk1∆	5	6	1				1
								343	snf1∆adk1∆	5	7	1				100
								344	snf1∆adk1∆	5	8	1				77
								345	snf1∆adk1∆	5	9	1				1
								346	snf1∆adk1∆	5	10	1				12
								347	snf1∆adk1∆	5	11	1				54
								348	snf1∆adk1∆	5	12			1		70
								349	snf1∆adk1∆	5	13	1				70
								350	snf1∆adk1∆	5	14			1		132
								351	snf1∆adk1∆	5	15			1		170
								352	snf1∆adk1∆	6	1		1			1
								353	snf1∆adk1∆	6	2	1				1
								354	snf1∆adk1∆	6	3		1			30
								355	snf1∆adk1∆	6	4	1				1
								356	snf1∆adk1∆	6	5	1				90
								357	snf1∆adk1∆	6	6		2			1
								358	snf1∆adk1∆	6	7	1				74
								359	snf1∆adk1∆	6	8	1				72
								360	snf1∆adk1∆	6	9	1				89
								361	snf1∆adk1∆	6	10	1				134
								362	snf1∆adk1∆	6	11	1				149
								363	snf1∆adk1∆	7	1	1				16
								364	snf1∆adk1∆	7	2			1		150
								365	snf1∆adk1∆	7	3	1				111
								366	snf1∆adk1∆	7	4	1				111
								367	snf1∆adk1∆	7	5			2		1
								368	snf1∆adk1∆	7	6		1			70
								369	snf1∆adk1∆	7	7	1				150
								370	snf1∆adk1∆	8	1				2	1
								371	snf1∆adk1∆	8	2	1				1
								372	snf1∆adk1∆	8	3	1				1
								373	snf1∆adk1∆	8	4	1				25
								374	snf1∆adk1∆	8	5			1		105

## Sheet: fig2G
	ATP (mM)
Time (min)	cell1	cell2
0	1.3526	1.3425
4	1.5494	1.3845
8	1.6926	1.638
12	1.725	1.5654
16	1.8232	1.6735
20	1.6473	1.7175
24	1.914	1.6333
28	1.8936	1.7249
32	1.8716	1.9837
36	1.9914	1.8089
40	1.7813	1.8969
44	1.6467	1.5756
48	1.6399	1.4876
52	1.391	1.2014
56	1.1456	0.98596
60	1.3172	1.1226
64	1.0337	0.79254
68	1.1702	1.0445
72	1.2217	1.1138
76	1.3298	1.2155
80	1.543	1.4967
84	1.6254	1.7889
88	1.6754	2.055
92	1.5014	1.7236
96	1.3481	1.4197
100	0.83398	1.0741
104	0.80137	0.77599
108	0.78091	0.70073
112	0.62678	0.95272
116	0.67963	0.88274
120	0.8971	1.1859
124	1.2477	1.0956
128	1.413	1.0994
132	1.6122	1.423
136	1.5363	1.4384
140	1.5758	1.4029
144	1.4833	1.3617
148	1.3026	1.2001
152	1.0208	0.82638
156	0.75267	0.84606
160	0.78155	0.92858
164	0.88502	1.092
168	0.91907	1.4195
172	1.1598	1.505
176	1.3705	1.8086
180	1.4447	1.82
184	1.4249	1.3398
188	1.4908	1.3008
192	1.4051	0.91244
196	1.173	0.53229
200	0.73627	0.69346
204	0.63069	0.95815
208	0.7016	1.3492
212	0.90753	1.567
216	0.86655	1.6077
220	1.3788	1.8455
224	1.3479	1.5404
228	1.5843	1.0967
232	1.4825	1.1924
236	1.4641	0.82073
240	1.1502	0.66986
244	0.61535	0.85542
248	0.43968	0.9547
252	0.7619	1.4924
256	0.82712	1.6635
260	1.0806	1.8087
264	1.4084	1.748
268	1.5446	1.6546
272	1.6127	1.2441
276	1.4368	0.558
280	1.5697	0.70453
284	1.4749	0.79193
288	0.99567	1.2458
292	0.781	1.4599
296	0.77827	1.6782
300	0.83054	1.6231
304	1.1	1.6477
308	1.3279	1.3104
312	1.608	0.90482
316	1.6213	0.65948
320	1.7112	0.90463
324	1.785	1.136
328	1.1007	1.2022
332	1.0088	1.4742
336	0.77653	1.7994
340	1.0388	1.6963
344	1.0877	1.3992
348	1.2904	1.214
352	1.5425	0.92597
356	1.6922	0.83179
360	1.5551	0.9867
364	1.6385	1.1563
368	1.4963	1.4884
372	1.0527	1.6183
376	0.82053	1.6782
380	1.0237	1.7281
384	1.05	1.2997
388	1.1315	0.97557
392	1.32	0.74313
396	1.5391	1.0144
400	1.6141	1.2109
404	1.4789	1.3674
408	1.6237	1.5535
412	1.2998	1.5595
416	1.0476	1.2791
420	0.81292	1.0286
424	1.313	1.031
428	1.1183	0.94274
432	1.1858	1.0733
436	1.4365	1.3511
440	1.7223	1.5897
444	1.8884	1.8546
448	1.71	1.8692
