# Supplementary material for: High and stable ATP levels prevent aberrant intracellular protein aggregation in yeast
Source: eLife. 2022 Apr 19;11:e67659. doi: 10.7554/eLife.67659 (PMC9018071; doi:10.7554/eLife.67659)
Supplement: Figure 3—source data 1. [file elife-67659-fig3-data1.xlsx]

## Sheet: fig3D
		Hsp104-GFP						Pab1-RS2
		wt	snf1	adk1	snf1adk1	bas1		wt	snf1	adk1	snf1adk1	bas1
		0	10.877	11.667	26.077	7.1672		0.45045	0.78125	0.896861	0.934579	0.930233
		0.20661	22.243	10.354	16.087	3.7681		0.874636	0.190114	0	0	0.161551
		0.47393	11.031	6.713	19.003	9.4595		0.26738	0.35461	0	0.865801	0.303951
					26.531	2.6152
	average	0.226847	14.717	9.578	21.9245	5.7525		0.530822	0.441991	0.298954	0.600127	0.465245
	SD	0.237612	6.51816	2.56655	5.19855	3.13708		0.311504	0.305102	0.517803	0.520862	0.408937
	p-value vs. wt (Dunnett test)		0.0002	0.0106	<0.0001	0.1584			0.9853	0.7517	1	0.9845
