# Supplementary material for: High and stable ATP levels prevent aberrant intracellular protein aggregation in yeast
Source: eLife. 2022 Apr 19;11:e67659. doi: 10.7554/eLife.67659 (PMC9018071; doi:10.7554/eLife.67659)
Supplement: Figure 4—source data 1. [file elife-67659-fig4-data1.xlsx]

## Sheet: fig4A
	average									SD (not shown)
	conditions	0 foci	1 focus	2 foci	>=3 foci	total	cell w/ foci	% cell w/ foci		conditions	0 foci	1 focus	2 foci	>=3 foci	total	cell w/ foci	% cell w/ foci
	0min	98.5112	1.38548	0	0.103333	344.667	6	1.48882		0min	1.2909	1.21955	0	0.178979	124.557	5.56776	1.2909
	2DG_15min	74.3499	5.87752	4.28874	15.4838	275.667	71.6667	25.6501		2DG_15min	12.9688	4.08147	2.71931	7.17832	71.3045	41.3562	12.9688
	2DG_30min	65.928	6.69415	3.9035	23.471	222	75.3333	34.072		2DG_30min	8.72716	1.46164	2.67857	6.18163	33.0454	20.2073	8.72716
	2DG_45min	70.7875	6.68582	3.97105	18.5556	292.333	85.3333	29.2125		2DG_45min	12.9969	4.87376	3.05446	6.53695	89.3663	41.065	12.9969
	2DG_80min	27.8673	17.6072	10.5265	44.0023	198.667	141.667	72.1327		2DG_80min	5.10267	5.45224	3.4711	4.19214	94.0868	60.9289	5.10267
	2DG_110min	36.7793	21.7197	9.31197	32.189	262.667	165.667	63.2207		2DG_110min	2.36824	9.21551	2.67547	13.3697	90.6661	54.8847	2.36824
	glucose_15min	88.8206	8.72942	1.93604	0.513958	280	29.6667	11.1794		glucose_15min	9.45833	6.19742	2.74549	0.599054	28.1603	23.3524	9.45833
	glucose_30min	88.101	8.69248	2.04216	1.1644	203	25.6667	11.899		glucose_30min	9.65144	7.17226	2.78715	0.26054	38.4318	23.7557	9.65144
	glucose_45min	86.6063	10.6591	2.31983	0.418082	286	39.3333	13.3937		glucose_45min	6.23499	5.44225	1.04406	0.484702	62.6418	24.0069	6.23499
	glucose_80min	78.4638	17.0152	3.47929	1.04168	305	66	21.5362		glucose_80min	6.3969	4.51104	1.63233	1.39762	134.399	40.1123	6.3969
	glucose_110min	80.469	15.8897	3.0527	0.588624	354.667	68	19.531		glucose_110min	3.65741	3.75163	0.330716	0.15133	80.3077	14	3.65741
	p-value vs glucose (Welch test)
	conditions	0 foci	1 focus	2 foci	>=3 foci
	2DG_15min	0.0999828	0.273673	0.175563	0.0339246
	2DG_30min	0.0212166	0.339859	0.225628	0.0122427
	2DG_45min	0.0787662	0.200061	0.226791	0.0200078
	2DG_80min	0.000276738	0.446012	0.0269227	0.000694111
	2DG_110min	9.20127e-05	0.196916	0.0269272	0.0273955

## Sheet: fig4C
		galactose	2DG
		5.35714	60.9524
		1.7094	77.3399
		1.72414	49.3243
		0	68.5121
	average	2.19767	64.0322
	SD	2.25645	11.8739
	p-value vs. galactose (Welch test)		0.000731776
