# Supplementary material for: High and stable ATP levels prevent aberrant intracellular protein aggregation in yeast
Source: eLife. 2022 Apr 19;11:e67659. doi: 10.7554/eLife.67659 (PMC9018071; doi:10.7554/eLife.67659)
Supplement: Figure 5—source data 1. [file elife-67659-fig5-data1.xlsx]

## Sheet: fig5C
	mean	% of cells								SD
	strain	PM	foci on PM	cytoplasmic foci	ER-like	cells with foci	p-value vs. wt (Dunnett test)	No. of preparation		strain	PM	foci on PM	cytoplasmic foci	ER-like	cells with foci
	wt	90.145	2.27332	5.89489	1.6868	7.4305		6		wt	7.23348	2.92187	3.42262	2.41347	0.0526258
	snf1	68.025	7.43212	20.8442	3.69871	28.2763	0.0005	5		snf1	11.8542	6.70289	11.5241	3.38366	0.111566
	adk1	66.2495	4.25882	28.2906	1.20116	32.5494	<0.0001	5		adk1	7.23876	2.42743	7.70558	0.809018	0.0760933
	snf1adk1	57.4281	3.02524	36.2703	3.27632	39.2955	<0.0001	4		snf1adk1	3.38408	2.43787	1.63915	5.24389	0.0404744
	bas1	67.4459	5.62138	25.3676	1.56515	30.989	0.0001	5		bas1	7.028	3.94939	5.09185	0.608092	0.0721777
	rpn4	83.4192	2.03886	13.2968	1.24521	15.3356	0.4275	3		rpn4	5.35682	1.89117	6.92829	2.15677	0.0536029

## Sheet: fig5D
	% cells with foci
	strain	adenine	mean	SD	No. of preparation	p-value vs. (+) adenine (Welch test)
	wt	-	9.80991	2.89197	5
	wt	+	9.24916	2.43813	5	0.749036
	bas1	-	31.6213	6.33223	5
	bas1	+	14.2611	1.87808	5	0.00249326
	adk1	-	36.8584	2.06938	5
	adk1	+	37.4278	7.44255	5	0.87607

## Sheet: fig5F
	% cell with foci
	condition	1st	2nd	3rd	mean	SD	p-value vs. DMSO (Welch test)
	pre (-30min)	7.2	8.66142	4.11523	6.65888	2.3209
	DMSO_0min	5.8011	6.97674	0.571429	4.44976	3.40978
	DMSO_30min	92.8962	84.7059	97.4409	91.681	6.45391
	DMSO_60min	94.2149	82.9545	94.5892	90.5862	6.61186
	DMSO_90min	32.1101	44.4444	19.4107	31.9884	12.5173
	DMSO_120min	14.5161	36.6279	14.7903	21.9781	12.6878
	MG132_0min	19.9115	19.7917	10.8108	16.838	5.22004	0.0166256
	MG132_30min	94.5312	84.0491	94.6108	91.0637	6.07497	0.45491
	MG132_60min	94.898	82.1739	90.6863	89.2527	6.48203	0.407654
	MG132_90min	59.3074	75.3731	56.7976	63.826	10.0785	0.0142142
	MG132_120min	55.0847	66.0194	47.5196	56.2079	9.30092	0.0114729
