# Supplementary material for: High and stable ATP levels prevent aberrant intracellular protein aggregation in yeast
Source: eLife. 2022 Apr 19;11:e67659. doi: 10.7554/eLife.67659 (PMC9018071; doi:10.7554/eLife.67659)
Supplement: Figure 6—figure supplement 1—source data 1. [file elife-67659-fig6-figsupp1-data1.xlsx]

## Sheet: fig6-supp1A
image_file	cell_number	foci_serial	foci mean intensity	foci_x	foci_y	cell_area
snf1adk1_hsp104-RS2_024.nd2	2	1	11857.8	304	117	43.967		strain	mean	SD	N	p-value vs. wt (Welch test)
snf1adk1_hsp104-RS2_024.nd2	2	2	6658.56	318	92	43.967		wt	6677.58	2661.4	329
snf1adk1_hsp104-RS2_024.nd2	13	3	5914	1499	165	27.697		snf1adk1	6692.47	3009.72	330	0.0382732
snf1adk1_hsp104-RS2_024.nd2	16	4	7124.11	69	187	48.529
snf1adk1_hsp104-RS2_024.nd2	21	5	7234.33	1347	169	34.110
snf1adk1_hsp104-RS2_024.nd2	31	6	8606	441	257	31.528
snf1adk1_hsp104-RS2_024.nd2	32	7	4760.22	525	289	26.750
snf1adk1_hsp104-RS2_024.nd2	34	8	8801.33	782	286	38.608
snf1adk1_hsp104-RS2_024.nd2	35	9	9407.67	1124	340	44.247
snf1adk1_hsp104-RS2_024.nd2	35	10	3638.89	1142	312	44.247
snf1adk1_hsp104-RS2_024.nd2	36	11	5340.56	969	315	37.231
snf1adk1_hsp104-RS2_024.nd2	41	12	2117.67	434	332	20.488
snf1adk1_hsp104-RS2_024.nd2	48	13	3914.22	1102	402	22.252
snf1adk1_hsp104-RS2_024.nd2	50	14	2912.44	991	421	18.831
snf1adk1_hsp104-RS2_024.nd2	51	15	8155.56	533	435	25.416
snf1adk1_hsp104-RS2_024.nd2	53	16	10016	625	467	59.203
snf1adk1_hsp104-RS2_024.nd2	56	17	11653	1541	473	37.274
snf1adk1_hsp104-RS2_024.nd2	57	18	3240.11	1010	468	20.445
snf1adk1_hsp104-RS2_024.nd2	62	19	2959	639	517	26.901
snf1adk1_hsp104-RS2_024.nd2	66	20	6102.11	355	543	22.145
snf1adk1_hsp104-RS2_024.nd2	69	21	11579.1	502	572	37.489
snf1adk1_hsp104-RS2_024.nd2	76	22	7451.89	106	634	9.835
snf1adk1_hsp104-RS2_024.nd2	92	23	8781.44	508	791	39.856
snf1adk1_hsp104-RS2_024.nd2	116	24	7440.56	190	1032	30.688
snf1adk1_hsp104-RS2_024.nd2	118	25	8307	1507	1039	24.082
snf1adk1_hsp104-RS2_024.nd2	120	26	7071.67	732	1078	24.770
snf1adk1_hsp104-RS2_025.nd2	1	1	2793.11	1610	16	31.915
snf1adk1_hsp104-RS2_025.nd2	4	2	6991.67	179	77	30.925
snf1adk1_hsp104-RS2_025.nd2	6	3	10009.3	1495	83	25.459
snf1adk1_hsp104-RS2_025.nd2	10	4	6484.78	719	127	31.054
snf1adk1_hsp104-RS2_025.nd2	11	5	3457.44	555	113	26.449
snf1adk1_hsp104-RS2_025.nd2	18	6	7721.89	312	156	11.901
snf1adk1_hsp104-RS2_025.nd2	19	7	7178.78	1472	180	27.460
snf1adk1_hsp104-RS2_025.nd2	19	8	7844.11	1462	178	27.460
snf1adk1_hsp104-RS2_025.nd2	25	9	5865.22	1230	200	10.287
snf1adk1_hsp104-RS2_025.nd2	33	10	7962.44	655	261	29.268
snf1adk1_hsp104-RS2_025.nd2	35	11	2355.11	1450	304	30.667
snf1adk1_hsp104-RS2_025.nd2	36	12	6025.44	811	317	34.132
snf1adk1_hsp104-RS2_025.nd2	37	13	4435.22	1107	327	20.531
snf1adk1_hsp104-RS2_025.nd2	38	14	6227.67	1586	316	30.409
snf1adk1_hsp104-RS2_025.nd2	39	15	4325.11	497	331	21.241
snf1adk1_hsp104-RS2_025.nd2	46	16	5838.89	582	368	21.736
snf1adk1_hsp104-RS2_025.nd2	50	17	3654.78	1446	376	27.310
snf1adk1_hsp104-RS2_025.nd2	60	18	4203.33	965	467	25.330
snf1adk1_hsp104-RS2_025.nd2	61	19	2536.89	1112	480	25.846
snf1adk1_hsp104-RS2_025.nd2	62	20	5798.67	1183	473	25.029
snf1adk1_hsp104-RS2_025.nd2	67	21	3221.11	325	519	25.287
snf1adk1_hsp104-RS2_025.nd2	68	22	7746.33	652	540	33.981
snf1adk1_hsp104-RS2_025.nd2	70	23	4522.33	307	535	11.621
snf1adk1_hsp104-RS2_025.nd2	71	24	5737.33	959	567	31.808
snf1adk1_hsp104-RS2_025.nd2	71	25	3755.89	931	565	31.808
snf1adk1_hsp104-RS2_025.nd2	76	26	6984.67	1380	608	30.215
snf1adk1_hsp104-RS2_025.nd2	80	27	8877.89	410	628	33.379
snf1adk1_hsp104-RS2_025.nd2	84	28	2203.78	588	662	30.495
snf1adk1_hsp104-RS2_025.nd2	85	29	2329.56	1406	680	27.805
snf1adk1_hsp104-RS2_025.nd2	86	30	2945.11	182	676	24.103
snf1adk1_hsp104-RS2_025.nd2	96	31	9624.33	320	753	32.109
snf1adk1_hsp104-RS2_025.nd2	102	32	10301.2	753	799	30.559
snf1adk1_hsp104-RS2_025.nd2	107	33	6699.44	1417	825	24.232
snf1adk1_hsp104-RS2_025.nd2	109	34	6310.22	662	836	20.574
snf1adk1_hsp104-RS2_025.nd2	113	35	7596.22	1469	863	25.588
snf1adk1_hsp104-RS2_025.nd2	123	36	7648.78	350	916	34.928
snf1adk1_hsp104-RS2_025.nd2	127	37	5613.33	1490	926	31.463
snf1adk1_hsp104-RS2_025.nd2	137	38	4290.56	1368	1032	25.696
snf1adk1_hsp104-RS2_026.nd2	5	1	6434.67	1322	114	29.505
snf1adk1_hsp104-RS2_026.nd2	7	2	3920.44	1174	144	21.564
snf1adk1_hsp104-RS2_026.nd2	13	3	10704.2	855	215	30.021
snf1adk1_hsp104-RS2_026.nd2	17	4	4846.67	1489	241	32.066
snf1adk1_hsp104-RS2_026.nd2	18	5	5153.11	1135	251	37.532
snf1adk1_hsp104-RS2_026.nd2	27	6	4359.11	1604	292	31.571
snf1adk1_hsp104-RS2_026.nd2	28	7	3408.22	780	276	9.727
snf1adk1_hsp104-RS2_026.nd2	35	8	9765.11	668	340	22.920
snf1adk1_hsp104-RS2_026.nd2	36	9	3780.56	1396	356	18.529
snf1adk1_hsp104-RS2_026.nd2	42	10	8502.33	1109	371	17.496
snf1adk1_hsp104-RS2_026.nd2	43	11	3660.67	1086	379	14.483
snf1adk1_hsp104-RS2_026.nd2	48	12	7585.44	636	434	44.031
snf1adk1_hsp104-RS2_026.nd2	48	13	6014.22	646	436	44.031
snf1adk1_hsp104-RS2_026.nd2	51	14	6234.56	406	456	13.343
snf1adk1_hsp104-RS2_026.nd2	59	15	4810.22	1063	487	15.344
snf1adk1_hsp104-RS2_026.nd2	67	16	2670.56	628	562	33.852
snf1adk1_hsp104-RS2_026.nd2	70	17	4531.78	284	580	20.832
snf1adk1_hsp104-RS2_026.nd2	71	18	6509	759	571	28.795
snf1adk1_hsp104-RS2_026.nd2	72	19	7317.89	1079	583	21.219
snf1adk1_hsp104-RS2_026.nd2	73	20	2187	651	593	25.179
snf1adk1_hsp104-RS2_026.nd2	78	21	3718.89	622	630	27.396
snf1adk1_hsp104-RS2_026.nd2	81	22	2967.56	284	674	23.242
snf1adk1_hsp104-RS2_026.nd2	86	23	3598.67	142	720	26.729
snf1adk1_hsp104-RS2_026.nd2	87	24	3132.44	290	734	26.191
snf1adk1_hsp104-RS2_026.nd2	92	25	4970.44	133	823	32.948
snf1adk1_hsp104-RS2_026.nd2	92	26	2913.89	106	820	32.948
snf1adk1_hsp104-RS2_026.nd2	95	27	8064.67	556	862	29.978
snf1adk1_hsp104-RS2_026.nd2	104	28	3403.44	1405	921	28.493
snf1adk1_hsp104-RS2_026.nd2	105	29	2500	580	934	26.879
snf1adk1_hsp104-RS2_026.nd2	113	30	5957.78	1421	957	19.390
snf1adk1_hsp104-RS2_027.nd2	4	1	11145.1	1354	58	34.950
snf1adk1_hsp104-RS2_027.nd2	4	2	2580.89	1337	41	34.950
snf1adk1_hsp104-RS2_027.nd2	10	3	11902.2	915	100	34.132
snf1adk1_hsp104-RS2_027.nd2	10	4	4064.56	927	81	34.132
snf1adk1_hsp104-RS2_027.nd2	10	5	2749.33	940	80	34.132
snf1adk1_hsp104-RS2_027.nd2	18	6	8179.78	853	159	41.556
snf1adk1_hsp104-RS2_027.nd2	19	7	8646.11	1380	178	29.031
snf1adk1_hsp104-RS2_027.nd2	21	8	6287.44	1561	189	24.813
snf1adk1_hsp104-RS2_027.nd2	25	9	7754.11	341	327	36.499
snf1adk1_hsp104-RS2_027.nd2	27	10	12717.3	723	342	44.785
snf1adk1_hsp104-RS2_027.nd2	31	11	10351.4	1389	369	28.945
snf1adk1_hsp104-RS2_027.nd2	35	12	12098.4	141	393	37.618
snf1adk1_hsp104-RS2_027.nd2	35	13	2725.44	168	404	37.618
snf1adk1_hsp104-RS2_027.nd2	36	14	11212.1	438	414	33.852
snf1adk1_hsp104-RS2_027.nd2	37	15	11873.2	592	412	12.138
snf1adk1_hsp104-RS2_027.nd2	41	16	15294.8	513	412	43.967
snf1adk1_hsp104-RS2_027.nd2	42	17	5893.33	185	429	29.591
snf1adk1_hsp104-RS2_027.nd2	42	18	4048	192	412	29.591
snf1adk1_hsp104-RS2_027.nd2	48	19	2645.33	623	473	27.331
snf1adk1_hsp104-RS2_027.nd2	50	20	6045.22	339	479	23.716
snf1adk1_hsp104-RS2_027.nd2	60	21	2140	872	518	19.605
snf1adk1_hsp104-RS2_027.nd2	63	22	8407.11	1004	550	31.463
snf1adk1_hsp104-RS2_027.nd2	63	23	3902.89	995	549	31.463
snf1adk1_hsp104-RS2_027.nd2	68	24	7512.67	1406	566	33.056
snf1adk1_hsp104-RS2_027.nd2	69	25	14694.1	171	615	39.017
snf1adk1_hsp104-RS2_027.nd2	73	26	9686.33	287	629	47.991
snf1adk1_hsp104-RS2_027.nd2	73	27	6448.67	308	634	47.991
snf1adk1_hsp104-RS2_027.nd2	77	28	3679.78	307	659	13.515
snf1adk1_hsp104-RS2_027.nd2	83	29	8200.33	1194	720	23.242
snf1adk1_hsp104-RS2_027.nd2	93	30	6646.78	419	767	35.724
snf1adk1_hsp104-RS2_027.nd2	96	31	15668.4	972	805	42.353
snf1adk1_hsp104-RS2_027.nd2	99	32	7115	1415	817	40.566
snf1adk1_hsp104-RS2_027.nd2	99	33	8925.33	1414	850	40.566
snf1adk1_hsp104-RS2_027.nd2	102	34	11542.4	974	879	33.292
snf1adk1_hsp104-RS2_027.nd2	103	35	10967.6	231	917	33.960
snf1adk1_hsp104-RS2_027.nd2	103	36	4529.78	223	931	33.960
snf1adk1_hsp104-RS2_027.nd2	105	37	6277.78	1347	943	27.439
snf1adk1_hsp104-RS2_027.nd2	107	38	3640.44	963	1001	30.495
snf1adk1_hsp104-RS2_027.nd2	108	39	9198.89	295	1001	45.731
snf1adk1_hsp104-RS2_027.nd2	108	40	4848.56	277	1015	45.731
snf1adk1_hsp104-RS2_027.nd2	112	41	9970.78	1554	1043	33.787
snf1adk1_hsp104-RS2_028.nd2	1	1	4277.44	1443	57	26.922
snf1adk1_hsp104-RS2_028.nd2	4	2	5012.11	1180	90	40.674
snf1adk1_hsp104-RS2_028.nd2	4	3	5548.78	1204	110	40.674
snf1adk1_hsp104-RS2_028.nd2	6	4	4706.44	1493	93	23.651
snf1adk1_hsp104-RS2_028.nd2	8	5	8058	144	88	37.381
snf1adk1_hsp104-RS2_028.nd2	9	6	9294.11	677	93	29.483
snf1adk1_hsp104-RS2_028.nd2	12	7	11428.3	1416	148	30.172
snf1adk1_hsp104-RS2_028.nd2	13	8	8421.56	557	189	41.686
snf1adk1_hsp104-RS2_028.nd2	19	9	11394.6	1429	195	34.863
snf1adk1_hsp104-RS2_028.nd2	20	10	10155.4	1318	193	38.845
snf1adk1_hsp104-RS2_028.nd2	22	11	4287.56	1116	206	21.262
snf1adk1_hsp104-RS2_028.nd2	24	12	12133.3	1363	209	32.130
snf1adk1_hsp104-RS2_028.nd2	25	13	3686.11	133	219	17.884
snf1adk1_hsp104-RS2_028.nd2	27	14	9371.11	1462	229	47.324
snf1adk1_hsp104-RS2_028.nd2	31	15	4220.56	900	276	29.828
snf1adk1_hsp104-RS2_028.nd2	32	16	7504	939	329	43.084
snf1adk1_hsp104-RS2_028.nd2	32	17	4440.78	955	335	43.084
snf1adk1_hsp104-RS2_028.nd2	37	18	13041.1	300	376	23.414
snf1adk1_hsp104-RS2_028.nd2	41	19	3964.67	499	411	39.082
snf1adk1_hsp104-RS2_028.nd2	42	20	3930.22	341	383	25.954
snf1adk1_hsp104-RS2_028.nd2	43	21	8504.56	1301	405	36.822
snf1adk1_hsp104-RS2_028.nd2	44	22	4290.33	417	385	43.127
snf1adk1_hsp104-RS2_028.nd2	47	23	3407.89	939	397	30.473
snf1adk1_hsp104-RS2_028.nd2	49	24	6635.67	315	421	32.087
snf1adk1_hsp104-RS2_028.nd2	50	25	9700.44	23	406	31.313
snf1adk1_hsp104-RS2_028.nd2	50	26	6734.89	19	437	31.313
snf1adk1_hsp104-RS2_028.nd2	50	27	5032.11	7	423	31.313
snf1adk1_hsp104-RS2_028.nd2	51	28	9310	588	418	38.092
snf1adk1_hsp104-RS2_028.nd2	55	29	4649.89	314	452	31.205
snf1adk1_hsp104-RS2_028.nd2	65	30	5984.33	823	483	28.859
snf1adk1_hsp104-RS2_028.nd2	66	31	4212.89	726	510	20.918
snf1adk1_hsp104-RS2_028.nd2	67	32	10295	315	507	28.493
snf1adk1_hsp104-RS2_028.nd2	70	33	12022.1	453	513	32.711
snf1adk1_hsp104-RS2_028.nd2	73	34	11594.8	653	528	41.191
snf1adk1_hsp104-RS2_028.nd2	77	35	3527.78	226	574	31.097
snf1adk1_hsp104-RS2_028.nd2	80	36	3084.56	1389	589	23.802
snf1adk1_hsp104-RS2_028.nd2	91	37	10951.2	1553	679	32.625
snf1adk1_hsp104-RS2_028.nd2	92	38	7315.56	329	677	11.879
snf1adk1_hsp104-RS2_028.nd2	94	39	7226.78	1060	686	33.508
snf1adk1_hsp104-RS2_028.nd2	97	40	7456.56	1579	715	39.060
snf1adk1_hsp104-RS2_028.nd2	97	41	6323.33	1601	725	39.060
snf1adk1_hsp104-RS2_028.nd2	99	42	3326.44	593	713	29.978
snf1adk1_hsp104-RS2_028.nd2	102	43	3846.67	1567	735	18.056
snf1adk1_hsp104-RS2_028.nd2	103	44	5394.44	777	741	36.585
snf1adk1_hsp104-RS2_028.nd2	103	45	2609	796	774	36.585
snf1adk1_hsp104-RS2_028.nd2	106	46	9053.56	1203	806	36.090
snf1adk1_hsp104-RS2_028.nd2	112	47	8340.56	336	888	34.455
snf1adk1_hsp104-RS2_028.nd2	114	48	4141.22	702	862	19.971
snf1adk1_hsp104-RS2_028.nd2	115	49	4795.33	775	869	23.199
snf1adk1_hsp104-RS2_028.nd2	118	50	3838.33	197	917	8.996
snf1adk1_hsp104-RS2_028.nd2	120	51	9394.44	222	940	9.189
snf1adk1_hsp104-RS2_028.nd2	122	52	9278.44	1540	968	40.416
snf1adk1_hsp104-RS2_028.nd2	122	53	6312.78	1556	966	40.416
snf1adk1_hsp104-RS2_028.nd2	128	54	9729.56	1525	1031	38.565
snf1adk1_hsp104-RS2_028.nd2	128	55	4867.56	1512	1020	38.565
snf1adk1_hsp104-RS2_028.nd2	130	56	7197	1552	1036	27.116
snf1adk1_hsp104-RS2_029.nd2	1	1	4369	1032	52	22.790
snf1adk1_hsp104-RS2_029.nd2	2	2	8962.22	648	54	42.224
snf1adk1_hsp104-RS2_029.nd2	7	3	3047.78	1336	130	31.183
snf1adk1_hsp104-RS2_029.nd2	12	4	6608.33	66	200	30.387
snf1adk1_hsp104-RS2_029.nd2	13	5	7258.89	675	197	18.357
snf1adk1_hsp104-RS2_029.nd2	13	6	2706.22	688	182	18.357
snf1adk1_hsp104-RS2_029.nd2	14	7	7224.78	1312	206	36.671
snf1adk1_hsp104-RS2_029.nd2	17	8	6537	841	230	36.219
snf1adk1_hsp104-RS2_029.nd2	19	9	4999.44	365	249	26.298
snf1adk1_hsp104-RS2_029.nd2	20	10	5079.78	764	228	20.617
snf1adk1_hsp104-RS2_029.nd2	26	11	4440.11	1368	288	26.793
snf1adk1_hsp104-RS2_029.nd2	29	12	9171.78	732	305	33.637
snf1adk1_hsp104-RS2_029.nd2	32	13	4820.33	897	377	25.825
snf1adk1_hsp104-RS2_029.nd2	33	14	7342.11	1159	369	37.812
snf1adk1_hsp104-RS2_029.nd2	45	15	5318.33	563	465	35.940
snf1adk1_hsp104-RS2_029.nd2	52	16	4899	555	615	24.275
snf1adk1_hsp104-RS2_029.nd2	62	17	4068.89	1140	716	26.040
snf1adk1_hsp104-RS2_029.nd2	70	18	5648.44	615	763	20.251
snf1adk1_hsp104-RS2_029.nd2	73	19	10440	779	757	40.330
snf1adk1_hsp104-RS2_029.nd2	76	20	4032.67	713	781	23.221
snf1adk1_hsp104-RS2_029.nd2	85	21	2910	115	833	25.244
snf1adk1_hsp104-RS2_029.nd2	87	22	11568.3	1062	830	33.874
snf1adk1_hsp104-RS2_029.nd2	89	23	7666.56	265	861	34.347
snf1adk1_hsp104-RS2_029.nd2	91	24	13254.7	1413	865	28.709
snf1adk1_hsp104-RS2_029.nd2	91	25	5746.78	1422	866	28.709
snf1adk1_hsp104-RS2_029.nd2	101	26	4232.44	891	921	21.090
snf1adk1_hsp104-RS2_029.nd2	104	27	4691.56	21	939	21.521
snf1adk1_hsp104-RS2_029.nd2	108	28	5196.56	877	931	33.013
snf1adk1_hsp104-RS2_029.nd2	109	29	9198.78	1569	949	34.907
snf1adk1_hsp104-RS2_029.nd2	109	30	3491	1602	950	34.907
snf1adk1_hsp104-RS2_029.nd2	113	31	7777	716	1072	16.937
snf1adk1_hsp104-RS2_029.nd2	114	32	3501.44	1056	1076	22.963
snf1adk1_hsp104-RS2_019.nd2	4	1	9314.11	835	64	13.924
snf1adk1_hsp104-RS2_019.nd2	6	2	3694.33	949	77	15.732
snf1adk1_hsp104-RS2_019.nd2	8	3	10358.4	1329	107	27.310
snf1adk1_hsp104-RS2_019.nd2	9	4	10380.7	1067	114	33.981
snf1adk1_hsp104-RS2_019.nd2	22	5	7673.56	657	201	9.039
snf1adk1_hsp104-RS2_019.nd2	27	6	8080.44	896	262	33.723
snf1adk1_hsp104-RS2_019.nd2	31	7	2514.22	456	428	23.393
snf1adk1_hsp104-RS2_019.nd2	38	8	8709.56	156	528	29.354
snf1adk1_hsp104-RS2_019.nd2	39	9	3517.89	437	539	11.427
snf1adk1_hsp104-RS2_019.nd2	43	10	6502.67	686	618	23.479
snf1adk1_hsp104-RS2_019.nd2	45	11	5561.11	21	651	17.044
snf1adk1_hsp104-RS2_019.nd2	57	12	14708.4	867	788	21.198
snf1adk1_hsp104-RS2_019.nd2	57	13	5150.33	857	769	21.198
snf1adk1_hsp104-RS2_019.nd2	60	14	3512.44	830	794	14.247
snf1adk1_hsp104-RS2_019.nd2	67	15	3212.56	1113	881	27.934
snf1adk1_hsp104-RS2_019.nd2	73	16	9358.33	1240	959	38.866
snf1adk1_hsp104-RS2_019.nd2	73	17	5608.89	1231	987	38.866
snf1adk1_hsp104-RS2_019.nd2	74	18	3444.89	1265	955	10.007
snf1adk1_hsp104-RS2_019.nd2	75	19	9314	1486	964	36.843
snf1adk1_hsp104-RS2_019.nd2	76	20	3109.78	859	1041	14.419
snf1adk1_hsp104-RS2_020.nd2	2	1	4709.11	530	60	17.475
snf1adk1_hsp104-RS2_020.nd2	4	2	8094	101	189	41.513
snf1adk1_hsp104-RS2_020.nd2	4	3	4103.33	88	180	41.513
snf1adk1_hsp104-RS2_020.nd2	7	4	8652.67	952	200	8.737
snf1adk1_hsp104-RS2_020.nd2	15	5	2385	1469	281	32.195
snf1adk1_hsp104-RS2_020.nd2	20	6	5542.78	493	331	20.272
snf1adk1_hsp104-RS2_020.nd2	24	7	9208.67	305	364	43.795
snf1adk1_hsp104-RS2_020.nd2	28	8	5705.89	1042	402	28.493
snf1adk1_hsp104-RS2_020.nd2	34	9	7441.11	487	431	32.259
snf1adk1_hsp104-RS2_020.nd2	36	10	11680.4	723	419	35.767
snf1adk1_hsp104-RS2_020.nd2	39	11	3132.78	725	487	26.255
snf1adk1_hsp104-RS2_020.nd2	43	12	5360.78	998	538	26.707
snf1adk1_hsp104-RS2_020.nd2	50	13	6122.67	1526	640	39.512
snf1adk1_hsp104-RS2_020.nd2	50	14	4284.67	1554	616	39.512
snf1adk1_hsp104-RS2_020.nd2	54	15	5585.78	1411	665	21.413
snf1adk1_hsp104-RS2_020.nd2	62	16	4770.67	908	836	38.221
snf1adk1_hsp104-RS2_020.nd2	62	17	3586.11	934	850	38.221
snf1adk1_hsp104-RS2_020.nd2	68	18	2983.44	1269	893	25.739
snf1adk1_hsp104-RS2_020.nd2	69	19	7931.44	652	898	21.865
snf1adk1_hsp104-RS2_020.nd2	70	20	10161	290	906	32.130
snf1adk1_hsp104-RS2_020.nd2	73	21	7854.11	30	956	25.588
snf1adk1_hsp104-RS2_020.nd2	74	22	3852	18	940	15.904
snf1adk1_hsp104-RS2_020.nd2	77	23	5583.89	273	983	8.630
snf1adk1_hsp104-RS2_020.nd2	79	24	8505.33	329	1023	30.409
snf1adk1_hsp104-RS2_020.nd2	80	25	6658.89	667	1035	33.292
snf1adk1_hsp104-RS2_020.nd2	80	26	6112.33	673	1007	33.292
snf1adk1_hsp104-RS2_021.nd2	7	1	3813.44	1121	117	22.016
snf1adk1_hsp104-RS2_021.nd2	12	2	8084.33	895	169	34.304
snf1adk1_hsp104-RS2_021.nd2	19	3	8000.78	988	218	33.185
snf1adk1_hsp104-RS2_021.nd2	20	4	8440	96	270	47.690
snf1adk1_hsp104-RS2_021.nd2	20	5	3954	92	255	47.690
snf1adk1_hsp104-RS2_021.nd2	20	6	4499.22	110	246	47.690
snf1adk1_hsp104-RS2_021.nd2	29	7	4084.56	1096	446	25.394
snf1adk1_hsp104-RS2_021.nd2	30	8	8399.22	718	454	24.125
snf1adk1_hsp104-RS2_021.nd2	32	9	4053.33	1339	463	19.476
snf1adk1_hsp104-RS2_021.nd2	35	10	8531.44	713	507	24.361
snf1adk1_hsp104-RS2_021.nd2	38	11	10312.1	463	551	30.775
snf1adk1_hsp104-RS2_021.nd2	42	12	2772.11	454	642	25.007
snf1adk1_hsp104-RS2_021.nd2	51	13	6019.89	506	750	9.254
snf1adk1_hsp104-RS2_021.nd2	52	14	3172	1339	769	15.732
snf1adk1_hsp104-RS2_021.nd2	54	15	9515.22	847	851	32.625
snf1adk1_hsp104-RS2_021.nd2	57	16	10886.7	1313	907	19.304
snf1adk1_hsp104-RS2_021.nd2	58	17	6371.33	546	950	22.037
snf1adk1_hsp104-RS2_021.nd2	60	18	10705.6	1098	1012	41.384
snf1adk1_hsp104-RS2_022.nd2	3	1	5299.78	483	101	19.132
snf1adk1_hsp104-RS2_022.nd2	7	2	4753.89	557	135	32.303
snf1adk1_hsp104-RS2_022.nd2	8	3	2761.89	44	162	23.393
snf1adk1_hsp104-RS2_022.nd2	11	4	12883.7	599	182	53.888
snf1adk1_hsp104-RS2_022.nd2	12	5	7232.78	1587	219	24.103
snf1adk1_hsp104-RS2_022.nd2	15	6	6343.78	795	287	31.140
snf1adk1_hsp104-RS2_022.nd2	23	7	16365.1	840	438	13.838
snf1adk1_hsp104-RS2_022.nd2	24	8	5043.44	736	428	20.359
snf1adk1_hsp104-RS2_022.nd2	26	9	2882.56	1174	454	12.826
snf1adk1_hsp104-RS2_022.nd2	28	10	11965.2	785	494	62.302
snf1adk1_hsp104-RS2_022.nd2	38	11	9522.44	470	536	11.212
snf1adk1_hsp104-RS2_022.nd2	45	12	4433.67	475	639	22.123
snf1adk1_hsp104-RS2_022.nd2	47	13	7025.44	953	645	27.869
snf1adk1_hsp104-RS2_022.nd2	51	14	12692.4	425	690	30.581
snf1adk1_hsp104-RS2_022.nd2	57	15	6034.67	716	864	29.935
snf1adk1_hsp104-RS2_022.nd2	59	16	9418.67	574	884	36.198
snf1adk1_hsp104-RS2_022.nd2	59	17	5188.89	580	900	36.198
snf1adk1_hsp104-RS2_022.nd2	61	18	3993.44	1508	904	24.555
snf1adk1_hsp104-RS2_022.nd2	63	19	5610.22	573	917	21.026
snf1adk1_hsp104-RS2_022.nd2	66	20	5172.56	1524	952	25.007
snf1adk1_hsp104-RS2_022.nd2	71	21	8037.89	1159	995	30.323
snf1adk1_hsp104-RS2_022.nd2	75	22	11308.6	603	1025	20.337
snf1adk1_hsp104-RS2_023.nd2	3	1	8661.33	1425	59	26.105
snf1adk1_hsp104-RS2_023.nd2	8	2	13121.7	1498	189	44.031
snf1adk1_hsp104-RS2_023.nd2	12	3	10628.4	1321	214	48.465
snf1adk1_hsp104-RS2_023.nd2	14	4	10792.2	1447	215	9.986
snf1adk1_hsp104-RS2_023.nd2	15	5	10836.8	378	208	38.479
snf1adk1_hsp104-RS2_023.nd2	17	6	2533.56	1362	242	17.582
snf1adk1_hsp104-RS2_023.nd2	22	7	8789.33	771	259	32.582
snf1adk1_hsp104-RS2_023.nd2	27	8	12495.2	445	359	46.764
snf1adk1_hsp104-RS2_023.nd2	27	9	5343.33	436	382	46.764
snf1adk1_hsp104-RS2_023.nd2	35	10	6898.33	973	475	31.399
snf1adk1_hsp104-RS2_023.nd2	36	11	7533.78	1007	461	10.287
snf1adk1_hsp104-RS2_023.nd2	40	12	10255.6	313	483	22.295
snf1adk1_hsp104-RS2_023.nd2	43	13	12391.1	1578	526	43.321
snf1adk1_hsp104-RS2_023.nd2	48	14	2857.67	682	642	24.986
snf1adk1_hsp104-RS2_023.nd2	50	15	6747.78	783	697	33.465
snf1adk1_hsp104-RS2_023.nd2	52	16	2721.44	1061	683	27.568
snf1adk1_hsp104-RS2_023.nd2	54	17	3710.56	1099	723	14.397
snf1adk1_hsp104-RS2_023.nd2	58	18	6857.11	756	738	40.071
snf1adk1_hsp104-RS2_023.nd2	58	19	5890.56	782	746	40.071
snf1adk1_hsp104-RS2_023.nd2	60	20	12058.1	290	804	42.008
snf1adk1_hsp104-RS2_023.nd2	61	21	11593	614	882	36.284
wt_hsp104-RS2_014.nd2	26	1	7922.33	50	132	21.736
wt_hsp104-RS2_014.nd2	31	2	10037.9	1196	158	18.981
wt_hsp104-RS2_014.nd2	35	3	9659.11	229	155	28.902
wt_hsp104-RS2_014.nd2	70	4	8429	671	351	29.871
wt_hsp104-RS2_014.nd2	70	5	7795.22	668	368	29.871
wt_hsp104-RS2_014.nd2	73	6	7306	1110	354	20.875
wt_hsp104-RS2_014.nd2	75	7	4955.11	1238	364	23.780
wt_hsp104-RS2_014.nd2	88	8	9055	1395	405	26.600
wt_hsp104-RS2_014.nd2	91	9	5967.44	1464	400	17.905
wt_hsp104-RS2_014.nd2	96	10	3091.67	1194	408	16.700
wt_hsp104-RS2_014.nd2	100	11	5409.22	1128	434	16.743
wt_hsp104-RS2_014.nd2	102	12	4003.22	1059	431	27.331
wt_hsp104-RS2_014.nd2	115	13	8561.56	661	493	33.465
wt_hsp104-RS2_014.nd2	115	14	4863.89	671	461	33.465
wt_hsp104-RS2_014.nd2	117	15	11779.1	1056	482	20.165
wt_hsp104-RS2_014.nd2	120	16	5021.33	1325	495	39.684
wt_hsp104-RS2_014.nd2	124	17	4360.78	1137	497	19.283
wt_hsp104-RS2_014.nd2	131	18	6309.78	305	503	30.602
wt_hsp104-RS2_014.nd2	144	19	3978.67	1552	532	17.195
wt_hsp104-RS2_014.nd2	151	20	10714.3	224	552	29.225
wt_hsp104-RS2_014.nd2	174	21	5405.33	1609	653	21.133
wt_hsp104-RS2_014.nd2	182	22	5816.67	1223	689	20.767
wt_hsp104-RS2_014.nd2	188	23	9292	705	725	27.676
wt_hsp104-RS2_014.nd2	192	24	7762.44	1022	734	20.359
wt_hsp104-RS2_014.nd2	193	25	3021.22	1129	765	15.086
wt_hsp104-RS2_014.nd2	194	26	9249.22	1249	769	30.516
wt_hsp104-RS2_014.nd2	207	27	7682.89	1210	894	15.990
wt_hsp104-RS2_014.nd2	215	28	8857.67	876	939	31.356
wt_hsp104-RS2_014.nd2	215	29	3686	867	929	31.356
wt_hsp104-RS2_014.nd2	217	30	2434	340	952	16.635
wt_hsp104-RS2_014.nd2	223	31	4236.33	927	957	15.021
wt_hsp104-RS2_014.nd2	239	32	8080.78	559	1025	17.625
wt_hsp104-RS2_014.nd2	250	33	2506.89	1479	1045	19.734
wt_hsp104-RS2_014.nd2	259	34	5942.11	1576	1070	14.634
wt_hsp104-RS2_015.nd2	2	1	2817.56	456	46	23.135
wt_hsp104-RS2_015.nd2	5	2	7761.22	213	57	33.529
wt_hsp104-RS2_015.nd2	10	3	2657.11	932	50	17.001
wt_hsp104-RS2_015.nd2	25	4	7500.56	699	85	14.290
wt_hsp104-RS2_015.nd2	31	5	8522.22	973	90	25.115
wt_hsp104-RS2_015.nd2	38	6	5347.89	421	127	24.663
wt_hsp104-RS2_015.nd2	42	7	7745.22	751	149	24.964
wt_hsp104-RS2_015.nd2	56	8	9305.11	1383	173	26.255
wt_hsp104-RS2_015.nd2	56	9	4703.89	1392	182	26.255
wt_hsp104-RS2_015.nd2	64	10	3451.11	62	238	19.110
wt_hsp104-RS2_015.nd2	68	11	2922	1404	232	26.105
wt_hsp104-RS2_015.nd2	68	12	3285.89	1384	234	26.105
wt_hsp104-RS2_015.nd2	74	13	5975.11	131	243	14.957
wt_hsp104-RS2_015.nd2	76	14	2934.33	436	244	23.651
wt_hsp104-RS2_015.nd2	77	15	6716.33	1372	256	28.816
wt_hsp104-RS2_015.nd2	83	16	4101.33	713	283	25.502
wt_hsp104-RS2_015.nd2	93	17	5749.89	906	350	45.150
wt_hsp104-RS2_015.nd2	93	18	4119.67	885	301	45.150
wt_hsp104-RS2_015.nd2	98	19	5098.89	412	338	22.425
wt_hsp104-RS2_015.nd2	99	20	9156.78	392	340	20.229
wt_hsp104-RS2_015.nd2	114	21	3019.33	822	402	13.945
wt_hsp104-RS2_015.nd2	122	22	2411.67	1387	439	22.640
wt_hsp104-RS2_015.nd2	128	23	5185.56	1183	495	24.426
wt_hsp104-RS2_015.nd2	135	24	4044.78	986	486	17.152
wt_hsp104-RS2_015.nd2	154	25	8142.22	1172	552	18.400
wt_hsp104-RS2_015.nd2	156	26	3333.22	1372	552	17.346
wt_hsp104-RS2_015.nd2	158	27	10707.2	1344	570	33.443
wt_hsp104-RS2_015.nd2	166	28	6401.78	1487	571	18.293
wt_hsp104-RS2_015.nd2	181	29	3059.11	508	602	14.763
wt_hsp104-RS2_015.nd2	188	30	8844.44	789	673	41.772
wt_hsp104-RS2_015.nd2	192	31	9174.33	1371	709	59.117
wt_hsp104-RS2_015.nd2	200	32	8118.67	524	720	26.729
wt_hsp104-RS2_015.nd2	201	33	12243.6	985	713	33.400
wt_hsp104-RS2_015.nd2	202	34	8166.67	1013	728	32.216
wt_hsp104-RS2_015.nd2	208	35	4943	313	747	20.660
wt_hsp104-RS2_015.nd2	211	36	5993.78	245	775	23.113
wt_hsp104-RS2_015.nd2	212	37	3562.89	174	766	20.724
wt_hsp104-RS2_015.nd2	220	38	10151.1	1102	796	46.119
wt_hsp104-RS2_015.nd2	225	39	6685.89	272	794	21.026
wt_hsp104-RS2_015.nd2	234	40	5881.44	336	828	19.110
wt_hsp104-RS2_015.nd2	241	41	6318.11	656	876	49.993
wt_hsp104-RS2_015.nd2	243	42	5211	1527	867	19.734
wt_hsp104-RS2_015.nd2	258	43	10629.2	1490	954	29.677
wt_hsp104-RS2_015.nd2	261	44	3236.11	681	953	19.196
wt_hsp104-RS2_015.nd2	262	45	7913.56	927	953	28.515
wt_hsp104-RS2_015.nd2	272	46	7804.33	265	1009	31.442
wt_hsp104-RS2_015.nd2	273	47	9037.56	432	1011	19.476
wt_hsp104-RS2_015.nd2	286	48	3258.11	249	1051	21.650
wt_hsp104-RS2_016.nd2	1	1	6716.33	1386	16	25.782
wt_hsp104-RS2_016.nd2	3	2	4633	256	32	20.660
wt_hsp104-RS2_016.nd2	10	3	3171.11	331	43	11.406
wt_hsp104-RS2_016.nd2	13	4	8136.78	939	67	18.379
wt_hsp104-RS2_016.nd2	17	5	7967.56	184	72	27.546
wt_hsp104-RS2_016.nd2	19	6	4867.78	1588	98	22.898
wt_hsp104-RS2_016.nd2	31	7	4861.67	839	143	20.229
wt_hsp104-RS2_016.nd2	37	8	5434.33	1352	176	28.041
wt_hsp104-RS2_016.nd2	52	9	5347.67	184	254	23.479
wt_hsp104-RS2_016.nd2	57	10	9956.44	1559	265	23.759
wt_hsp104-RS2_016.nd2	73	11	2314	559	325	19.756
wt_hsp104-RS2_016.nd2	81	12	10663.3	1522	392	33.142
wt_hsp104-RS2_016.nd2	83	13	5680.67	694	404	30.344
wt_hsp104-RS2_016.nd2	83	14	3014.22	705	397	30.344
wt_hsp104-RS2_016.nd2	88	15	8765.22	415	437	25.803
wt_hsp104-RS2_016.nd2	92	16	3463.11	1335	437	13.343
wt_hsp104-RS2_016.nd2	97	17	7835.67	181	467	21.349
wt_hsp104-RS2_016.nd2	101	18	5729.44	557	479	23.522
wt_hsp104-RS2_016.nd2	107	19	9860.44	776	464	11.040
wt_hsp104-RS2_016.nd2	108	20	5555	119	485	24.577
wt_hsp104-RS2_016.nd2	121	21	7193.78	56	496	24.942
wt_hsp104-RS2_016.nd2	123	22	3641.56	743	509	29.655
wt_hsp104-RS2_016.nd2	124	23	5033.11	1456	502	19.864
wt_hsp104-RS2_016.nd2	133	24	5971.67	346	588	28.622
wt_hsp104-RS2_016.nd2	136	25	4374.33	446	590	23.845
wt_hsp104-RS2_016.nd2	137	26	4638.11	1240	596	19.498
wt_hsp104-RS2_016.nd2	143	27	4972.22	357	669	53.135
wt_hsp104-RS2_016.nd2	144	28	4053.33	400	622	19.003
wt_hsp104-RS2_016.nd2	192	29	5119.22	166	832	17.001
wt_hsp104-RS2_016.nd2	205	30	6945	1022	872	24.986
wt_hsp104-RS2_016.nd2	207	31	7096.56	1593	889	24.878
wt_hsp104-RS2_016.nd2	209	32	3827.44	122	898	20.810
wt_hsp104-RS2_016.nd2	220	33	3613.89	1476	918	16.808
wt_hsp104-RS2_016.nd2	221	34	6513.22	1407	903	22.468
wt_hsp104-RS2_016.nd2	223	35	4176.11	689	907	25.480
wt_hsp104-RS2_016.nd2	235	36	12272.7	63	924	29.569
wt_hsp104-RS2_016.nd2	238	37	9826.56	331	921	30.215
wt_hsp104-RS2_016.nd2	240	38	7946.44	783	943	31.937
wt_hsp104-RS2_016.nd2	241	39	7311	1013	921	29.161
wt_hsp104-RS2_016.nd2	245	40	4660.67	1583	946	24.082
wt_hsp104-RS2_016.nd2	249	41	7766.22	461	937	28.429
wt_hsp104-RS2_016.nd2	250	42	4759.11	1343	943	10.136
wt_hsp104-RS2_016.nd2	255	43	3055.67	351	945	16.334
wt_hsp104-RS2_016.nd2	273	44	11200.6	506	976	23.866
wt_hsp104-RS2_016.nd2	283	45	6469	730	996	25.351
wt_hsp104-RS2_016.nd2	285	46	7320.78	639	1007	27.546
wt_hsp104-RS2_016.nd2	286	47	10712.7	786	996	23.501
wt_hsp104-RS2_016.nd2	288	48	2607.56	690	996	21.327
wt_hsp104-RS2_016.nd2	289	49	10743.6	532	1011	28.386
wt_hsp104-RS2_016.nd2	294	50	7337.33	473	1019	18.034
wt_hsp104-RS2_016.nd2	296	51	5184.33	444	1044	24.340
wt_hsp104-RS2_016.nd2	296	52	2471.67	442	1032	24.340
wt_hsp104-RS2_016.nd2	301	53	3075.56	1301	1033	19.153
wt_hsp104-RS2_017.nd2	8	1	6287.67	68	18	28.020
wt_hsp104-RS2_017.nd2	15	2	8918.33	163	57	18.422
wt_hsp104-RS2_017.nd2	43	3	9497.33	337	95	26.600
wt_hsp104-RS2_017.nd2	52	4	2168.78	1292	116	15.452
wt_hsp104-RS2_017.nd2	57	5	3439.89	370	120	18.293
wt_hsp104-RS2_017.nd2	66	6	12562.7	518	161	24.512
wt_hsp104-RS2_017.nd2	75	7	5372.22	1308	216	31.205
wt_hsp104-RS2_017.nd2	78	8	6406	1201	213	24.082
wt_hsp104-RS2_017.nd2	80	9	4999.11	75	209	25.459
wt_hsp104-RS2_017.nd2	83	10	5313.78	128	230	16.463
wt_hsp104-RS2_017.nd2	101	11	2188.89	630	254	18.658
wt_hsp104-RS2_017.nd2	109	12	3377	522	276	17.346
wt_hsp104-RS2_017.nd2	110	13	8670.44	718	280	24.232
wt_hsp104-RS2_017.nd2	112	14	3592.44	222	280	21.930
wt_hsp104-RS2_017.nd2	117	15	2117.89	426	274	15.904
wt_hsp104-RS2_017.nd2	118	16	4293.78	567	289	22.640
wt_hsp104-RS2_017.nd2	121	17	8585.67	303	323	38.328
wt_hsp104-RS2_017.nd2	136	18	8785.33	569	336	28.644
wt_hsp104-RS2_017.nd2	138	19	13282.8	985	336	24.404
wt_hsp104-RS2_017.nd2	148	20	5061.78	644	362	19.046
wt_hsp104-RS2_017.nd2	155	21	9202.44	898	370	27.202
wt_hsp104-RS2_017.nd2	164	22	3322.33	718	412	14.914
wt_hsp104-RS2_017.nd2	167	23	4559.44	918	438	20.488
wt_hsp104-RS2_017.nd2	174	24	6926.44	1252	442	23.866
wt_hsp104-RS2_017.nd2	175	25	8915.78	1183	446	19.153
wt_hsp104-RS2_017.nd2	190	26	4775.56	809	509	21.499
wt_hsp104-RS2_017.nd2	192	27	8070.67	755	523	31.528
wt_hsp104-RS2_017.nd2	197	28	9049.67	398	546	44.591
wt_hsp104-RS2_017.nd2	203	29	5224.78	344	546	28.558
wt_hsp104-RS2_017.nd2	209	30	7794	650	554	12.030
wt_hsp104-RS2_017.nd2	214	31	9906.22	1272	596	25.459
wt_hsp104-RS2_017.nd2	226	32	6027.44	1382	628	22.252
wt_hsp104-RS2_017.nd2	237	33	4305.78	1381	661	13.988
wt_hsp104-RS2_017.nd2	239	34	4054	1312	670	26.858
wt_hsp104-RS2_017.nd2	245	35	7639.67	1347	679	25.394
wt_hsp104-RS2_017.nd2	251	36	3830.11	1355	717	21.435
wt_hsp104-RS2_017.nd2	254	37	3771.67	1425	731	22.833
wt_hsp104-RS2_017.nd2	260	38	3993.56	1123	749	20.746
wt_hsp104-RS2_017.nd2	281	39	9125.11	484	799	31.937
wt_hsp104-RS2_017.nd2	295	40	3565.89	324	852	14.569
wt_hsp104-RS2_017.nd2	313	41	2664.89	422	968	21.284
wt_hsp104-RS2_017.nd2	316	42	6645.33	376	990	25.179
wt_hsp104-RS2_017.nd2	324	43	5477.11	300	1028	22.468
wt_hsp104-RS2_017.nd2	330	44	5315.11	1561	1027	29.096
wt_hsp104-RS2_017.nd2	332	45	4541.56	1379	1025	18.250
wt_hsp104-RS2_017.nd2	340	46	4358.33	841	1059	11.750
wt_hsp104-RS2_018.nd2	2	1	5447.89	889	27	21.478
wt_hsp104-RS2_018.nd2	24	2	3764.67	1082	156	20.746
wt_hsp104-RS2_018.nd2	28	3	11874	27	166	26.707
wt_hsp104-RS2_018.nd2	42	4	8896.78	477	283	23.974
wt_hsp104-RS2_018.nd2	43	5	4068	1314	254	22.683
wt_hsp104-RS2_018.nd2	45	6	2586.22	1413	261	17.281
wt_hsp104-RS2_018.nd2	50	7	4665.22	1213	327	28.407
wt_hsp104-RS2_018.nd2	53	8	6309	773	339	29.914
wt_hsp104-RS2_018.nd2	55	9	7627.33	1172	352	24.318
wt_hsp104-RS2_018.nd2	57	10	4471.89	1602	356	19.326
wt_hsp104-RS2_018.nd2	79	11	7702	213	427	23.866
wt_hsp104-RS2_018.nd2	83	12	4004.89	157	435	16.635
wt_hsp104-RS2_018.nd2	85	13	9323.78	1248	454	35.531
wt_hsp104-RS2_018.nd2	89	14	4978.67	1275	455	17.970
wt_hsp104-RS2_018.nd2	91	15	12366.9	294	456	31.054
wt_hsp104-RS2_018.nd2	103	16	4521.78	197	483	15.882
wt_hsp104-RS2_018.nd2	108	17	3239	618	514	19.412
wt_hsp104-RS2_018.nd2	117	18	3234.11	276	532	18.852
wt_hsp104-RS2_018.nd2	119	19	7526.22	1570	552	28.214
wt_hsp104-RS2_018.nd2	120	20	7553	378	522	24.082
wt_hsp104-RS2_018.nd2	123	21	6550	327	537	22.425
wt_hsp104-RS2_018.nd2	134	22	2731.33	849	582	16.722
wt_hsp104-RS2_018.nd2	142	23	2726.11	143	595	15.043
wt_hsp104-RS2_018.nd2	152	24	8484.11	253	620	22.511
wt_hsp104-RS2_018.nd2	154	25	10496.3	999	645	32.884
wt_hsp104-RS2_018.nd2	163	26	2507	1238	634	21.155
wt_hsp104-RS2_018.nd2	166	27	9932.78	1069	673	32.647
wt_hsp104-RS2_018.nd2	179	28	2805.44	308	672	17.561
wt_hsp104-RS2_018.nd2	182	29	2834.33	852	678	20.100
wt_hsp104-RS2_018.nd2	187	30	5727.44	509	709	37.252
wt_hsp104-RS2_018.nd2	195	31	5407.11	677	707	29.462
wt_hsp104-RS2_018.nd2	196	32	2832.56	472	699	20.014
wt_hsp104-RS2_018.nd2	197	33	4295.56	841	711	23.285
wt_hsp104-RS2_018.nd2	212	34	11358.8	1232	786	32.410
wt_hsp104-RS2_018.nd2	220	35	7964.11	1309	815	32.367
wt_hsp104-RS2_018.nd2	223	36	10791	66	806	11.686
wt_hsp104-RS2_018.nd2	225	37	12772.4	1249	838	33.874
wt_hsp104-RS2_018.nd2	230	38	2740.67	1482	834	17.152
wt_hsp104-RS2_018.nd2	244	39	4707.89	1176	896	33.680
wt_hsp104-RS2_018.nd2	246	40	6661.67	1448	888	22.898
wt_hsp104-RS2_018.nd2	252	41	3645.56	1203	937	26.169
wt_hsp104-RS2_018.nd2	254	42	11623.3	316	937	35.488
wt_hsp104-RS2_018.nd2	259	43	7029	1160	960	21.973
wt_hsp104-RS2_018.nd2	260	44	8916	1097	979	38.931
wt_hsp104-RS2_018.nd2	262	45	3260	1156	986	18.465
wt_hsp104-RS2_018.nd2	273	46	6663.67	1087	1031	19.821
wt_hsp104-RS2_018.nd2	275	47	4874.56	851	1033	19.175
wt_hsp104-RS2_018.nd2	278	48	3972.11	1217	1059	13.429
wt_hsp104-RS2_018.nd2	279	49	5103.89	1555	1067	16.980

## Sheet: fig6-supp1B
upper left								upper right								lower right								lower left
Time (min)	QUEEN ratio	Hsp104-RS2	regression line					Time (min)	QUEEN ratio	Hsp104-RS2	regression line					Time (min)	QUEEN ratio	Hsp104-RS2	regression line					Time (min)	QUEEN ratio	Hsp104-RS2	regression line
0	2.16502	697.388	666.132		slope	0.694598		0	2.01754	720.281	693.614		slope	1.0232		0	1.97291	672.175	670.06		slope	0.732628		0	1.95513	702.577	668.2		slope	0.812091
4	2.19652	692.75	668.911		intercept	666.132		4	1.96882	718.589	697.707		intercept	693.614		4	1.9952	670.148	672.99		intercept	670.06		4	1.85759	701.397	671.448		intercept	668.2
8	2.21981	693.882	671.689		RSQ	0.970542		8	1.79693	717.557	701.8		RSQ	0.988849		8	1.99615	669.294	675.921		RSQ	0.979299		8	1.87874	699.447	674.696		RSQ	0.973834
12	2.18982	697.644	674.467		Corr. Coef.	0.985161		12	1.98656	721.337	705.893		Corr. Coef.	0.994409		12	1.95122	675.798	678.851		Corr. Coef.	0.989595		12	2.00528	707.44	677.945		Corr. Coef.	0.98683
16	2.07169	691.2	677.246					16	1.90887	725.829	709.985					16	2.01338	673.8	681.782					16	1.89572	705.928	681.193
20	2.1026	688.883	680.024					20	2.00649	724.041	714.078					20	1.99816	673.562	684.712					20	1.99421	698.879	684.442
24	2.17481	697.484	682.803					24	2.00825	735.581	718.171					24	2.03165	683.666	687.643					24	2.00803	704.575	687.69
28	2.20834	699.511	685.581					28	1.98836	731.976	722.264					28	2.04115	680.514	690.573					28	1.85615	704.745	690.938
32	2.14724	707.079	688.359					32	1.98241	721.65	726.357					32	2.00841	685.3	693.504					32	1.97742	704.365	694.187
36	2.17851	697.636	691.138					36	1.89935	725.817	730.449					36	2.00097	697.062	696.434					36	1.93136	711.093	697.435
40	2.05976	704.219	693.916					40	1.93957	742.65	734.542					40	2.08914	695.185	699.365					40	1.95802	710.149	700.683
44	2.02704	711.915	696.695					44	1.81219	735.386	738.635					44	2.02021	704.774	702.295					44	1.9647	720.94	703.932
48	2.09593	702.713	699.473					48	1.81708	743.378	742.728					48	2.05272	703.19	705.226					48	1.97824	716.616	707.18
52	2.08876	705.598	702.251					52	1.82065	756.154	746.821					52	2.10346	711.527	708.156					52	1.97437	706.267	710.428
56	2.13386	705.226	705.03					56	1.85017	742.496	750.914					56	2.03503	707.198	711.087					56	2.04413	715.344	713.677
60	2.14438	710.542	707.808					60	1.79482	750.268	755.006					60	2.0528	713.83	714.017					60	1.91526	713.301	716.925
64	2.1402	702.996	710.587					64	1.95233	748.175	759.099					64	2.01343	721.803	716.948					64	1.90384	722.345	720.174
68	2.00041	709.268	713.365					68	1.89015	765.065	763.192					68	2.13898	728.769	719.878					68	1.97249	726.529	723.422
72	2.04172	716.279	716.143					72	1.82797	762.663	767.285					72	2.14987	724.892	722.809					72	1.9725	734.603	726.67
76	2.14077	713.55	718.922					76	1.87197	766.87	771.378					76	2.09002	728.233	725.739					76	2.03873	730.238	729.919
80	2.07656	710.706	721.7					80	1.87724	766.569	775.47					80	2.13	736.506	728.67					80	1.914	728.616	733.167
84	2.12776	719.625	724.478					84	1.90463	771.614	779.563					84	2.15768	732.178	731.6					84	1.85062	718.82	736.415
88	2.13076	715.605	727.257					88	1.89433	775.675	783.656					88	1.91318	740.648	734.531					88	1.88017	716.837	739.664
92	2.18237	715.753	730.035					92	1.82228	778.622	787.749					92	2.05959	738.725	737.461					92	1.89727	730.927	742.912
96	2.1027	715.84	732.814					96	1.8469	784.927	791.842					96	1.98618	744.834	740.392					96	1.98868	728.066	746.16
100	2.14503	726.377	735.592					100	1.83812	798.939	795.935					100	1.93879	751.644	743.322					100	1.94891	725.637	749.409
104	2.18555	715.547	738.37					104	1.87571	808.228	800.027					104	1.88901	751.513	746.253					104	1.95617	724.498	752.657
108	2.11814	728.954	741.149					108	1.85794	808.756	804.12					108	1.97844	759.918	749.183					108	1.98681	745.04	755.906
112	2.15066	727.55	743.927					112	1.84017	802.102	808.213					112	1.88165	755.787	752.114					112	1.94227	747.255	759.154
116	2.03932	732.615	746.706					116	1.86328	816.195	812.306					116	1.9541	753.781	755.044					116	1.86363	754.09	762.402
120	2.05381	728.959	749.484					120	1.71312	826.833	816.399					120	2.03358	763.138	757.975					120	1.95478	752.022	765.651
124	2.0683	735.789	752.262					124	1.76142	819.289	820.491					124	1.87737	763.576	760.905					124	1.94174	758.85	768.899
128	2.12274	733.621	755.041					128	1.87796	819.699	824.584					128	2.03351	764.167	763.836					128	1.93686	763.3	772.147
132	2.13095	740.396	757.819					132	1.82435	833.248	828.677					132	2.04669	763.414	766.766					132	1.95813	764.881	775.396
136	2.01112	742.051	760.598					136	1.87578	831.614	832.77					136	1.98837	767.784	769.697					136	2.00584	762.566	778.644
140	2.16132	745.317	763.376					140	1.82112	833.829	836.863					140	2.06474	782.698	772.627					140	1.96838	770.205	781.892
144	2.00016	751.743	766.154					144	1.73441	844.528	840.956					144	2.05976	783.382	775.558					144	1.94066	767.042	785.141
148	2.00603	752.251	768.933					148	1.8416	850.577	845.048					148	2.05395	788.295	778.488					148	1.96483	763.447	788.389
152	2.00313	764.652	771.711					152	1.69841	842.516	849.141					152	2.00704	789.1	781.419					152	1.93896	772.712	791.638
156	2.10851	767.352	774.49					156	1.73413	866.126	853.234					156	1.96013	798.659	784.349					156	2.05948	778.057	794.886
160	2.02686	770.52	777.268					160	1.8252	860.683	857.327					160	1.91129	798.706	787.28					160	1.88048	785.736	798.134
164	2.04832	768.171	780.046					164	1.84113	857.138	861.42					164	1.95407	807.196	790.21					164	1.73402	784.236	801.383
168	2.11199	763.953	782.825					168	1.82801	858.102	865.512					168	1.86658	802.027	793.141					168	1.82319	792.634	804.631
172	2.05435	768.203	785.603					172	1.75932	855.553	869.605					172	1.97957	791.672	796.071					172	1.91237	800.623	807.879
176	1.97563	777.949	788.382					176	1.78178	848.927	873.698					176	1.91764	793.42	799.002					176	1.9159	793.397	811.128
180	2.08483	785.903	791.16					180	1.85293	864.642	877.791					180	1.94463	812.958	801.932					180	1.84277	789.884	814.376
184	2.13828	785.019	793.938					184	1.82273	871.024	881.884					184	1.92838	803.653	804.863					184	1.83088	793.928	817.624
188	2.10922	790.007	796.717					188	1.79254	877.988	885.977					188	1.96909	797.026	807.794					188	1.80443	806.791	820.873
192	2.07102	799.67	799.495					192	1.70271	869.642	890.069					192	1.94721	811.157	810.724					192	1.84424	823.749	824.121
196	2.08181	807.209	802.273					196	1.79844	880.711	894.162					196	1.97348	791.694	813.655					196	1.87097	812.077	827.37
200	2.1427	810.165	805.052					200	1.87801	886.228	898.255					200	2.07063	796.271	816.585					200	1.89193	831.37	830.618
204	2.23044	828.972	807.83					204	1.81716	890.833	902.348					204	2.03903	798.591	819.516					204	1.88445	827.34	833.866
208	2.15004	816.64	810.609					208	1.8133	903.87	906.441					208	2.10633	800.679	822.446					208	1.8442	839.477	837.115
212	2.02266	828.291	813.387					212	1.74856	907.154	910.533					212	2.14999	817.056	825.377					212	1.86166	840.332	840.363
216	1.99135	832.621	816.165					216	1.9037	909.589	914.626					216	2.00875	812.845	828.307					216	1.8722	832.734	843.611
220	1.98802	817.458	818.944					220	1.78873	907.923	918.719					220	1.99192	817.267	831.238					220	1.84712	845.43	846.86
224	1.9847	826.417	821.722					224	1.80699	905.829	922.812					224	2.00065	827.267	834.168					224	1.7494	856.372	850.108
228	1.96622	830.872	824.501					228	1.82524	906.313	926.905					228	1.98667	824.298	837.099					228	1.81508	863.956	853.357
232	2.11274	833.638	827.279					232	1.80439	922.634	930.998					232	2.05966	839.743	840.029					232	1.8392	860.413	856.605
236	2.03252	843.266	830.057					236	1.86477	913.191	935.09					236	2.01547	843.787	842.96					236	1.86019	878.035	859.853
240	1.98527	846.472	832.836					240	1.84556	924.87	939.183					240	1.83688	849.362	845.89					240	1.74672	883.558	863.102
244	2.06608	844.846	835.614					244	1.85906	933.244	943.276					244	2.05093	855.59	848.821					244	1.8916	882.297	866.35
248	2.03875	852.903	838.393					248	1.80977	940.833	947.369					248	1.98798	868.211	851.751					248	1.76136	875.996	869.598
252	2.03054	857.894	841.171					252	1.77412	943.646	951.462					252	1.91714	860.807	854.682					252	1.80361	879.281	872.847
256	2.0875	859.899	843.949					256	1.87956	962.618	955.554					256	1.99012	860.911	857.612					256	1.79973	870.079	876.095
260	1.91946	854.252	846.728					260	1.78717	973.988	959.647					260	1.99735	873.007	860.543					260	1.78549	872.225	879.343
264	2.01333	841.452	849.506					264	1.74543	965.134	963.74					264	1.96364	866.993	863.473					264	1.89594	888.465	882.592
268	2.03792	854.021	852.285					268	1.70368	966.711	967.833					268	1.90271	871.231	866.404					268	1.85268	885.154	885.84
272	2.02669	851.711	855.063					272	1.73985	966.252	971.926					272	1.94932	869.097	869.334					272	1.80942	886.146	889.089
276	1.97175	857.448	857.841					276	1.68732	967.138	976.019					276	1.93636	869.218	872.265					276	1.78293	897.847	892.337
280	1.96807	847.486	860.62					280	1.68946	975.142	980.111					280	1.91021	874.337	875.195					280	1.90309	904.9	895.585
284	1.97284	863.532	863.398					284	1.81941	988.26	984.204													284	1.91792	903.089	898.834
288	2.0474	866.384	866.176					288	1.65195	984.715	988.297													288	1.90382	909.471	902.082
292	2.00302	858.766	868.955					292	1.73527	990.012	992.39													292	1.78869	925.375	905.33
296	1.97167	847.613	871.733					296	1.78989	1001.97	996.483													296	1.79077	912.73	908.579
300	2.01225	872.663	874.512					300	1.7947	1002.96	1000.58													300	1.75209	916.476	911.827
304	2.01641	875.499	877.29					304	1.68729	1014.96	1004.67													304	1.76284	927.919	915.075
308	2.02057	871.972	880.068					308	1.76592	1011.76	1008.76													308	1.77741	919.053	918.324
312	2.03062	886.356	882.847					312	1.69802	1014.22	1012.85													312	1.77086	922.721	921.572
316	2.06535	881.044	885.625					316	1.80266	1056.49	1016.95													316	1.79515	939.023	924.821
320	2.00831	889.746	888.404					320	1.76159	1014.03	1021.04													320	1.87795	933.512	928.069
324	2.04497	895.548	891.182					324	1.68078	1031.57	1025.13													324	1.81065	943.727	931.317
328	2.08403	897.023	893.96					328	1.83784	1043.12	1029.23													328	1.84085	946.982	934.566
332	2.05329	898.779	896.739					332	1.87012	1043.42	1033.32													332	1.81112	932.302	937.814
336	1.97321	907.484	899.517					336	1.75081	1047.43	1037.41													336	1.7902	937.43	941.062
340	1.89313	912.044	902.296					340	1.68604	1061.4	1041.5													340	1.78945	937.265	944.311
344	2.03445	911.025	905.074					344	1.80476	1054.02	1045.6													344	1.79514	949.792	947.559
348	2.08458	917.656	907.852					348	1.77606	1059.49	1049.69													348	1.87181	965.301	950.807
352	1.97337	923.065	910.631					352	1.81066	1074.76	1053.78													352	1.82971	970.216	954.056
356	2.07007	933.37	913.409					356	1.87926	1069.24	1057.87													356	1.78761	961.183	957.304
