# Supplementary material for: High and stable ATP levels prevent aberrant intracellular protein aggregation in yeast
Source: eLife. 2022 Apr 19;11:e67659. doi: 10.7554/eLife.67659 (PMC9018071; doi:10.7554/eLife.67659)
Supplement: Figure 6—figure supplement 2—source data 1. [file elife-67659-fig6-figsupp2-data1.xlsx]

## Sheet: fig6-supp2A
upper left								upper right								lower right								lower left
Time (min)	QUEEN ratio	Hsp104-RS2	regression line					Time (min)	QUEEN ratio	Hsp104-RS2	regression line					Time (min)	QUEEN ratio	Hsp104-RS2	regression line					Time (min)	QUEEN ratio	Hsp104-RS2	regression line
0	1.54709	712.677	689.403		slope	0.631248		0	1.64275	693.741	672.916		slope	0.642898		0	1.84763	761.947	696.799		slope	0.932704		0	1.88766	857.326	839.275		slope	0.857439
4	1.62478	722.382	691.928		intercept	689.403		4	1.71387	693.089	675.487		intercept	672.916		4	1.81087	760.865	700.53		intercept	696.799		4	1.95079	866.556	842.705		intercept	839.275
8	1.63821	729.931	694.453		RSQ	0.977324		8	1.59489	696.805	678.059		RSQ	0.983465		8	1.78576	741.422	704.261		RSQ	0.966994		8	1.96907	868.307	846.135		RSQ	0.961447
12	1.65202	723.658	696.978		Corr. Coef.	0.988597		12	1.68223	701.195	680.63		Corr. Coef.	0.991698		12	1.86691	753.621	707.992		Corr. Coef.	0.983359		12	1.87892	861.653	849.564		Corr. Coef.	0.980534
16	1.60839	720.472	699.503					16	1.65659	698.165	683.202					16	1.83234	759.659	711.723					16	1.91272	857.559	852.994
20	1.60032	728.673	702.028					20	1.71513	699.108	685.774					20	1.75096	748.506	715.454					20	1.88714	867.146	856.424
24	1.57071	723.609	704.553					24	1.66851	705.826	688.345					24	1.79244	756.369	719.184					24	1.86416	888.717	859.854
28	1.58273	720.585	707.078					28	1.60997	701.605	690.917					28	1.82511	757.715	722.915					28	1.86595	875.237	863.283
32	1.48085	721.695	709.603					32	1.67752	701.793	693.488					32	1.79878	774.779	726.646					32	1.89681	899.303	866.713
36	1.66039	727.313	712.128					36	1.72189	706.852	696.06					36	1.83418	771.919	730.377					36	1.8904	881.142	870.143
40	1.66049	730.182	714.653					40	1.68895	709.868	698.631					40	1.82412	779.214	734.108					40	1.93457	902.905	873.573
44	1.66746	728.419	717.178					44	1.65613	706.094	701.203					44	1.69786	780.097	737.838					44	1.91385	896.442	877.002
48	1.60145	720.303	719.703					48	1.72936	714.998	703.775					48	1.74521	782.542	741.569					48	2.05449	910.529	880.432
52	1.68999	726.728	722.228					52	1.6284	710.329	706.346					52	1.77244	786.952	745.3					52	1.83807	902.441	883.862
56	1.67425	718.481	724.753					56	1.61976	718.282	708.918					56	1.79506	787.094	749.031					56	1.95413	899.984	887.292
60	1.66293	720.782	727.278					60	1.69254	721.209	711.489					60	1.7298	789.863	752.762					60	1.97418	903.607	890.721
64	1.68192	734.241	729.803					64	1.65485	723.661	714.061					64	1.83573	791.914	756.493					64	1.90495	912.796	894.151
68	1.52266	728.948	732.328					68	1.64705	722.052	716.633					68	1.68252	791.448	760.223					68	1.90174	921.428	897.581
72	1.68236	735.105	734.853					72	1.8151	723.442	719.204					72	1.69721	799.865	763.954					72	1.89266	927.542	901.011
76	1.86202	733.413	737.378					76	1.85941	729.315	721.776					76	1.72976	798.066	767.685					76	1.99992	922.353	904.44
80	1.69824	742.728	739.903					80	1.72711	729.464	724.347					80	1.80952	785.537	771.416					80	1.96559	941.142	907.87
84	1.62782	731.94	742.428					84	1.69622	728.336	726.919					84	1.64766	790.679	775.147					84	1.94955	947.583	911.3
88	1.71402	747.2	744.953					88	1.70618	728.816	729.491					88	1.74786	794.26	778.877					88	1.94392	927.366	914.73
92	1.60797	745.054	747.478					92	1.82318	733.315	732.062					92	1.7111	794.499	782.608					92	2.01619	946.323	918.159
96	1.72442	743.69	750.003					96	1.6394	742.915	734.634					96	1.76154	805.198	786.339					96	1.8156	943.24	921.589
100	1.62217	751.859	752.528					100	1.62863	743.235	737.205					100	1.72205	811.944	790.07					100	1.85653	938.872	925.019
104	1.63884	754.474	755.053					104	1.73894	747.572	739.777					104	1.75538	812.903	793.801					104	1.89746	954.034	928.449
108	1.73877	751.397	757.578					108	1.65761	749.407	742.349					108	1.77108	815.196	797.532					108	1.91377	956.939	931.878
112	1.67142	756.215	760.103					112	1.76733	757.381	744.92					112	1.73686	822.893	801.262					112	1.95818	961.046	935.308
116	1.67554	761.977	762.628					116	1.72884	746.939	747.492					116	1.74052	817.45	804.993					116	1.92597	946.155	938.738
120	1.7062	766.294	765.153					120	1.6266	755.471	750.063					120	1.70591	807.758	808.724					120	1.88396	957.266	942.168
124	1.65517	767.856	767.678					124	1.61471	756.711	752.635					124	1.79357	807.29	812.455					124	1.94852	964.277	945.597
128	1.72182	773.417	770.203					128	1.72493	765.026	755.207					128	1.69824	810.163	816.186					128	1.90371	969.477	949.027
132	1.70786	763.813	772.728					132	1.6828	759.527	757.778					132	1.78608	811.137	819.916					132	1.88926	950.515	952.457
136	1.68896	772.426	775.253					136	1.7529	762.311	760.35					136	1.7434	812.659	823.647					136	1.89337	959.286	955.887
140	1.68497	775.369	777.778					140	1.68849	774.795	762.921					140	1.79373	818.606	827.378					140	1.81246	959.728	959.317
144	1.67379	769.181	780.303					144	1.70965	769.162	765.493					144	1.71921	820.033	831.109					144	1.90556	955.824	962.746
148	1.66261	772.624	782.828					148	1.7496	766.372	768.064					148	1.83823	826.646	834.84					148	1.85956	969.205	966.176
152	1.651	784.106	785.353					152	1.71128	767.386	770.636					152	1.79435	826.074	838.571					152	1.78608	963.47	969.606
156	1.69039	770.026	787.878					156	1.72909	774.918	773.208					156	1.8327	824.997	842.301					156	1.74759	974.364	973.036
160	1.7073	777.702	790.403					160	1.78079	775.158	775.779					160	1.72744	833.356	846.032					160	1.84764	977.326	976.465
164	1.68987	778.869	792.928					164	1.69593	777.814	778.351					164	1.75198	810.099	849.763					164	1.87593	983.358	979.895
168	1.65877	791.785	795.453					168	1.67463	785.355	780.922					168	1.76448	816.031	853.494					168	1.84373	996.524	983.325
172	1.66514	789.244	797.978					172	1.71902	779.868	783.494					172	1.77647	820.028	857.225					172	1.80237	986.896	986.755
176	1.73924	799.119	800.503					176	1.73997	781.774	786.066					176	1.59916	815.598	860.955					176	1.80573	987.094	990.184
180	1.72956	797.152	803.028					180	1.73016	761.911	788.637					180	1.73319	820.099	864.686					180	1.84386	1005.76	993.614
184	1.7506	794.358	805.553					184	1.76261	780.162	791.209					184	1.89352	820.524	868.417					184	1.82987	997.502	997.044
188	1.73022	800.708	808.078					188	1.66093	781.212	793.78					188	1.79632	810.076	872.148					188	1.79996	997.938	1000.47
192	1.75208	808.56	810.603					192	1.73874	772.306	796.352					192	1.64332	818.593	875.879					192	1.81184	997.9	1003.9
196	1.65133	811.415	813.128					196	1.80185	772.995	798.924					196	1.82989	814.952	879.61					196	1.84903	996.124	1007.33
200	1.7099	809.674	815.653					200	1.7526	765.624	801.495					200	1.90969	827.455	883.34					200	1.86759	1000.13	1010.76
204	1.69732	808.208	818.178					204	1.7605	763.005	804.067					204	1.80927	839.908	887.071					204	1.73707	993.603	1014.19
208	1.71955	816.906	820.703					208	1.74636	782.513	806.638					208	1.9251	841.293	890.802					208	1.82698	1005.64	1017.62
212	1.80156	819.189	823.228					212	1.7045	803.984	809.21					212	1.73418	844.45	894.533					212	1.86574	1003.85	1021.05
216	1.80955	818.823	825.753					216	1.80285	791.461	811.782					216	1.76078	855.799	898.264					216	1.85763	1009.38	1024.48
220	1.75609	810.689	828.278					220	1.82411	796.951	814.353					220	1.78739	859.165	901.994					220	1.84651	1014.54	1027.91
224	1.65392	822.238	830.803					224	1.72592	797.755	816.925					224	1.75694	866.209	905.725					224	1.97289	1024.13	1031.34
228	1.75253	824.472	833.328					228	1.72866	803.515	819.496					228	1.7703	879.72	909.456					228	1.84471	1027.92	1034.77
232	1.69404	818.604	835.853					232	1.75961	809.501	822.068					232	1.7527	890.98	913.187					232	1.79525	1027.52	1038.2
236	1.67668	829.174	838.378					236	1.80772	815.127	824.64					236	1.81132	881.781	916.918					236	1.84362	1037.64	1041.63
240	1.6308	849.801	840.903					240	1.8394	816.859	827.211					240	1.80058	884.875	920.648					240	1.81261	1041.88	1045.06
244	1.81283	844.31	843.428					244	1.80036	817.661	829.783					244	1.82	884.499	924.379					244	1.78159	1044.53	1048.49
248	1.79346	849.159	845.953					248	1.85827	826.605	832.354					248	1.8011	899.013	928.11					248	1.8654	1024.72	1051.92
252	1.72284	861.498	848.478					252	1.74634	823.873	834.926					252	1.73192	894.038	931.841					252	1.86527	1028.28	1055.35
256	1.72019	845.667	851.003					256	1.7989	817.428	837.498					256	1.87614	904.723	935.572					256	1.85902	1043.71	1058.78
260	1.78883	858.418	853.528					260	1.82346	800.369	840.069					260	1.82306	913.618	939.303					260	1.84364	1036.34	1062.21
264	1.71285	853.195	856.053					264	1.79339	800.652	842.641					264	1.74746	914.87	943.033					264	1.85097	1045.8	1065.64
268	1.79559	858.079	858.578					268	1.72802	823.254	845.212					268	1.80125	912.982	946.764					268	1.92464	1061.01	1069.07
272	1.81083	866.255	861.103					272	1.75046	814.005	847.784					272	1.86212	924.835	950.495					272	1.85911	1074.77	1072.5
276	1.90508	866.488	863.628					276	1.80748	824.271	850.355					276	1.75215	924.288	954.226					276	1.88467	1071.35	1075.93
280	1.76092	868.574	866.153					280	1.79109	856.699	852.927					280	1.79956	925.336	957.957					280	1.67189	1073.44	1079.36
284	1.75599	863.063	868.678					284	1.82045	870.186	855.499					284	1.93711	944.514	961.687					284	1.78712	1057.15	1082.79
288	1.74957	865.84	871.203					288	1.74575	864.659	858.07					288	1.74635	951.896	965.418					288	1.63845	1057.12	1086.22
292	1.74315	866.812	873.728					292	1.832	875.619	860.642					292	1.7699	951.557	969.149					292	1.69576	1082.22	1089.65
296	1.68355	876.049	876.253					296	1.87839	876.936	863.213					296	1.81662	959.804	972.88					296	1.77761	1100.53	1093.08
300	1.75677	866.358	878.778					300	1.84484	881.301	865.785					300	1.81556	963.819	976.611					300	1.72221	1088.57	1096.51
304	1.62353	875.669	881.303					304	1.83258	872.214	868.357					304	1.80091	977.842	980.342					304	1.90027	1092.11	1099.94
308	1.65564	883.827	883.828					308	1.82374	874.421	870.928					308	1.75585	966.936	984.072					308	1.86979	1079.82	1103.37
312	1.83391	883.672	886.353					312	1.8157	874.616	873.5					312	1.72249	988.796	987.803					312	1.83931	1063.2	1106.8
316	1.80975	886.139	888.878					316	1.93262	877.809	876.071					316	1.91503	979.127	991.534					316	1.79091	1074.17	1110.23
320	1.67119	907.133	891.403					320	1.86873	887.308	878.643					320	1.79374	995.598	995.265					320	1.84794	1064.63	1113.66
324	1.71984	893.857	893.928					324	1.90349	879.6	881.215					324	1.88265	998.27	998.996					324	1.81511	1071.84	1117.09
328	1.71601	907.26	896.453					328	1.86604	892.605	883.786					328	1.83721	1003.46	1002.73					328	1.78228	1069.13	1120.51
332	1.77977	916.564	898.978					332	1.90793	893.445	886.358					332	1.87552	1001.74	1006.46					332	1.89314	1095.73	1123.94
336	1.75986	896.522	901.503					336	1.8897	898.675	888.929					336	1.851	1012.03	1010.19					336	1.86875	1094.3	1127.37
340	1.75991	905.064	904.028					340	1.8785	888.334	891.501					340	1.87223	994.099	1013.92					340	1.86095	1097.65	1130.8
344	1.80609	909.043	906.553					344	1.85458	901.871	894.073					344	1.95995	1008.82	1017.65					344	1.83526	1115.36	1134.23
348	1.80065	893.23	909.078					348	1.84024	888.242	896.644					348	1.87724	1009.93	1021.38					348	1.69145	1131.04	1137.66
352	1.93296	893.149	911.603					352	1.84228	902.395	899.216					352	1.79857	1006.71	1025.11					352	1.8417	1124.66	1141.09
356	1.80948	889.004	914.128					356	1.88589	886.492	901.787					356	1.97247	1023.14	1028.84					356	1.83092	1144.93	1144.52
360	1.75066	892.359	916.653					360	1.90671	889.668	904.359					360	1.82888	1016.25	1032.57					360	1.81655	1128.5	1147.95
364	1.70195	886.714	919.178					364	1.92022	898.671	906.931					364	1.90997	1013.17	1036.3					364	1.88722	1115.58	1151.38
368	1.84491	894.333	921.703					368	1.94071	898.751	909.502					368	1.87485	1018.95	1040.03					368	1.70907	1106.52	1154.81
372	1.77412	913.945	924.228					372	1.91009	913.278	912.074					372	1.83974	1033.9	1043.77					372	1.79542	1103.18	1158.24
376	1.80587	907.757	926.753					376	1.92939	898.784	914.645					376	1.78418	1024.17	1047.5					376	1.81448	1104.33	1161.67
380	1.79884	922.263	929.278					380	2.00263	913.621	917.217					380	1.83434	1026.58	1051.23					380	1.7733	1107.73	1165.1
384	1.84377	920.134	931.803					384	1.97218	910.136	919.788					384	1.87458	1051.03	1054.96					384	1.85538	1112.9	1168.53
388	1.79259	919.767	934.328					388	1.84326	909.165	922.36					388	1.86189	1061.28	1058.69					388	1.77043	1118.24	1171.96
392	1.81827	926.809	936.853					392	1.9358	912.774	924.932					392	1.94246	1073.78	1062.42					392	1.90608	1119.34	1175.39
396	1.84395	928.144	939.378					396	1.81406	922.736	927.503					396	1.89348	1090.81	1066.15					396	1.77379	1132.04	1178.82
400	1.78403	915.94	941.903					400	1.89447	933.685	930.075					400	1.83826	1072.65	1069.88					400	1.87501	1123.56	1182.25
404	1.86808	931.457	944.428					404	1.86397	937.454	932.646					404	1.85758	1081.35	1073.61					404	1.78891	1134.18	1185.68
408	1.81155	948.592	946.953					408	1.8197	939.958	935.218					408	1.87315	1097.31	1077.34					408	1.88464	1147.77	1189.11
412	1.75713	948.906	949.478					412	1.96419	954.654	937.79					412	1.87487	1096.51	1081.07					412	1.82988	1135.85	1192.54
416	1.80316	937.371	952.003					416	1.95172	962.48	940.361					416	1.95949	1077.74	1084.8					416	1.78784	1126.02	1195.97
420	1.87784	937.604	954.528					420	1.957	947.073	942.933					420	1.90311	1071.4	1088.54					420	1.74581	1136.39	1199.4
424	1.84464	944.409	957.053					424	1.95428	950.144	945.504					424	1.83863	1066.78	1092.27					424	1.84438	1144.31	1202.83
428	1.93777	934.354	959.578					428	1.94369	954.953	948.076					428	1.77415	1083.35	1096					428	1.74493	1179.09	1206.26
432	1.82406	944.271	962.103					432	1.81559	948.739	950.648					432	1.81545	1093.97	1099.73					432	1.83841	1199.63	1209.69
436	1.71041	970.146	964.628					436	1.86937	938.706	953.219					436	1.87829	1103.71	1103.46					436	1.7191	1189.57	1213.12
440	1.70117	967.091	967.153					440	2.00004	953.868	955.791					440	1.82597	1089.21	1107.19					440	1.84291	1194.48	1216.55
444	1.79623	970.322	969.678					444	1.98935	947.049	958.362					444	1.87479	1078.71	1110.92					444	1.86373	1181.25	1219.98
448	1.75763	972.116	972.203					448	1.77277	952.729	960.934					448	1.88421	1093.43	1114.65					448	1.82174	1217.6	1223.41
452	1.79685	992.106	974.728					452	1.77999	960.896	963.506					452	1.82184	1099.03	1118.38					452	1.85749	1224.56	1226.84
456	1.87683	987.126	977.253					456	1.87135	963.991	966.077					456	1.83693	1110.03	1122.11					456	1.80307	1234.2	1230.27
460	1.86587	977.371	979.778					460	1.78764	961.565	968.649					460	1.84433	1139.11	1125.84					460	1.7675	1244	1233.7
464	1.77212	950.097	982.303					464	1.84592	975.195	971.22					464	1.77033	1126.13	1129.57					464	1.78902	1225.24	1237.13
468	1.73337	960.317	984.828					468	1.90393	973.659	973.792					468	1.79662	1160.63	1133.31					468	1.83541	1247.34	1240.56
472	1.7756	988.081	987.353					472	1.89719	978.181	976.364					472	1.79227	1143.04	1137.04					472	1.823	1241.48	1243.99
476	1.8428	988.677	989.878					476	1.8229	973.593	978.935					476	1.82458	1168.44	1140.77					476	1.76261	1246.14	1247.42
480	1.8231	996.335	992.403					480	1.61896	971.694	981.507					480	1.90321	1161.2	1144.5					480	1.70974	1268.56	1250.85
484	1.82582	998.375	994.928					484	1.76574	983.976	984.078					484	1.85369	1150.14	1148.23					484	1.76943	1303.58	1254.28
488	1.94661	1017.46	997.453					488	1.85636	993.191	986.65					488	1.77799	1174.76	1151.96					488	1.80007	1294.42	1257.71
492	1.9964	1034.49	999.978					492	1.8425	1010.8	989.221					492	1.81473	1177.38	1155.69					492	1.70312	1291.39	1261.13
496	1.89179	1001.49	1002.5					496	1.87739	1017.35	991.793					496	1.84319	1197.78	1159.42					496	1.65075	1318.91	1264.56
500	1.77806	1002.43	1005.03					500	1.88999	1013.53	994.365					500	1.80084	1192.55	1163.15					500	1.77448	1319.85	1267.99
504	1.8689	1041.79	1007.55					504	1.89334	1029.42	996.936					504	1.78446	1202.12	1166.88					504	1.77366	1251.58	1271.42
508	1.78401	1050.77	1010.08					508	1.86512	1009.26	999.508					508	1.77707	1201.43	1170.61					508	1.8154	1320.34	1274.85
512	1.93477	1065.98	1012.6					512	1.88016	1001.86	1002.08					512	1.76969	1191.07	1174.34					512	1.79601	1309.94	1278.28
516	1.91222	997.727	1015.13					516	1.86842	1010.52	1004.65					516	1.83149	1174.91	1178.07					516	1.75087	1310.62	1281.71
520	1.84012	1057.52	1017.65					520	1.88232	992.296	1007.22					520	1.90548	1166.14	1181.81					520	1.7367	1311.82	1285.14
524	1.89422	1048.94	1020.18					524	1.82963	994.082	1009.79					524	1.815	1186.99	1185.54					524	1.8206	1321.24	1288.57
528	1.90437	1027.76	1022.7					528	1.74631	1007.34	1012.37					528	1.74553	1176.4	1189.27					528	1.83723	1334.08	1292
532	1.96612	1033.59	1025.23					532	1.86322	1003.68	1014.94					532	1.80538	1170	1193					532	1.74598	1322.22	1295.43
536	1.95244	1033.51	1027.75					536	1.77217	991.296	1017.51					536	1.83248	1182.63	1196.73					536	1.82164	1313.09	1298.86
540	1.93996	1046.3	1030.28					540	1.80058	1011.52	1020.08					540	1.77779	1191.71	1200.46					540	1.84049	1320.01	1302.29
544	1.76813	1054.75	1032.8					544	1.84468	1016.68	1022.65					544	1.75241	1235.94	1204.19					544	1.7675	1345.11	1305.72
548	1.87892	1082.79	1035.33					548	1.86802	1027.03	1025.22					548	1.88616	1242.03	1207.92					548	1.7654	1348.48	1309.15
								552	1.78882	1022.27	1027.8					552	1.89815	1247.38	1211.65					552	1.76021	1348.56	1312.58
								556	1.75361	1042.23	1030.37					556	1.84713	1247.9	1215.38					556	1.71364	1372.7	1316.01
								560	1.83327	1051.01	1032.94					560	1.93567	1257.58	1219.11					560	1.78384	1404.06	1319.44
								564	1.93471	1071.62	1035.51					564	1.8341	1290.01	1222.84					564	1.88028	1385.57	1322.87
								568	1.897	1071.44	1038.08					568	1.97487	1292.43	1226.58					568	1.84142	1366.23	1326.3
								572	1.87682	1067.93	1040.65					572	1.85387	1308.27	1230.31					572	1.92954	1371.45	1329.73
								576	1.88558	1073.77	1043.22					576	1.82718	1269.6	1234.04					576	1.81107	1358.37	1333.16
								580	1.85113	1064.13	1045.8					580	1.88558	1258.87	1237.77					580	1.66023	1352.08	1336.59
								584	1.92863	1052.76	1048.37					584	1.83154	1241.73	1241.5					584	1.83934	1382.12	1340.02
								588	1.92205	1051.47	1050.94					588	1.84675	1252.77	1245.23					588	1.78847	1367.15	1343.45
								592	1.74849	1053.77	1053.51					592	1.70506	1264.78	1248.96					592	1.80268	1354.8	1346.88
								596	1.74823	1047.91	1056.08					596	1.84438	1265.84	1252.69					596	1.7819	1382.04	1350.31
																								600	1.89036	1371.27	1353.74

## Sheet: fig6-supp2B
strain	series	cell	ID	start frame	Dynamics	RMSD	RSQ	corr_coef	duration
wt	1	1	1	31	S	8.73183	0.979299	0.989595	280		strain	mean	SD	N	p-value vs. wt (Welch test)
wt	1	2	2	58	S	14.4289	0.976412	0.988135	360		wt	15.4168	5.53916	20
wt	1	3	3	1	S	22.4658	0.96218	0.980908	356		snf1adk1	30.6612	13.649	38	1.69474e-07
wt	1	4	4	70	S	8.47141	0.981703	0.990809	316
wt	2	1	5	77	S	11.2911	0.988849	0.994409	356
wt	2	2	6	67	S	19.837	0.975649	0.987749	356
wt	3	1	7	31	S	9.12628	0.979572	0.989733	360
wt	4	1	8	35	S	15.7974	0.97611	0.987983	356
wt	6	1	9	60	S	13.2188	0.990549	0.995263	356
wt	1	1	10	1	S	17.8555	0.904253	0.950922	356
wt	1	2	11	93	S	29.5279	0.938419	0.96872	356
wt	2	1	12	1	S	24.6249	0.889288	0.94302	356
wt	2	2	13	1	S	16.3749	0.958794	0.97918	348
wt	3	1	14	1	S	10.2836	0.947162	0.973222	356
wt	3	2	15	20	S	13.0075	0.972773	0.986292	356
wt	4	1	16	35	S	13.8331	0.973834	0.98683	356
wt	4	2	17	47	S	12.5751	0.970542	0.985161	356
wt	5	1	18	43	S	17.7354	0.958192	0.978873	356
wt	5	2	19	37	S	17.571	0.983167	0.991548	356
wt	6	1	20	1	S	11.5782	0.973954	0.986891	356
snf1∆adk1∆	4	1	21	1	S	42.9784	0.933356	0.966103	636
snf1∆adk1∆	4	2	22	100	S	15.3216	0.977324	0.988597	548
snf1∆adk1∆	4	3	23	168	S	13.555	0.943445	0.971311	276
snf1∆adk1∆	4	4	24	1	S	19.9422	0.892079	0.944499	460
snf1∆adk1∆	5	1	25	30	S	26.3981	0.972008	0.985904	480
snf1∆adk1∆	5	2	26	15	S	22.5125	0.972313	0.986059	476
snf1∆adk1∆	5	4	27	58	S	14.4384	0.983465	0.991698	596
snf1∆adk1∆	6	2	28	22	S	58.9667	0.876911	0.936435	516
snf1∆adk1∆	6	4	29	1	S	41.3808	0.929133	0.963916	556
snf1∆adk1∆	6	5	30	62	S	26.0436	0.948864	0.974096	476
snf1∆adk1∆	7	2	31	41	S	18.8206	0.955829	0.977665	476
snf1∆adk1∆	3	1	38	1	S	29.9368	0.961447	0.980534	600
snf1∆adk1∆	3	2	39	1	S	50.333	0.91333	0.955683	600
snf1∆adk1∆	3	3	40	87	S	14.1309	0.977996	0.988937	596
snf1∆adk1∆	4	1	41	2	S	24.7588	0.977549	0.988711	596
snf1∆adk1∆	4	2	42	2	S	42.5743	0.929658	0.964188	596
snf1∆adk1∆	5	1	43	1	S	38.0831	0.931704	0.965248	596
snf1∆adk1∆	6	2	44	1	S	29.8454	0.966994	0.983359	596
snf1∆adk1∆	6	3	45	1	S	30.471	0.911496	0.954723	596
snf1∆adk1∆	7	3	46	1	S	24.7535	0.926864	0.962738	716
snf1∆adk1∆	1	1	54	2	S	29.4129	0.946847	0.973061	596
snf1∆adk1∆	3	2	55	1	S	31.8367	0.951088	0.975237	596
snf1∆adk1∆	3	3	56	84	S	20.8124	0.975054	0.987448	596
snf1∆adk1∆	5	2	57	1	S	77.7204	0.85856	0.926585	596
snf1∆adk1∆	6	1	58	79	S	19.131	0.96837	0.984058	596
snf1∆adk1∆	7	1	59	1	S	28.6334	0.982722	0.991323	596
snf1∆adk1∆	1	1	70	14	S	30.2613	0.939824	0.969445	596
snf1∆adk1∆	4	1	71	1	S	25.9463	0.965308	0.982501	596
snf1∆adk1∆	1	2	76	1	S	27.4294	0.962046	0.980839	596
snf1∆adk1∆	2	1	77	1	S	37.0283	0.862892	0.92892	596
snf1∆adk1∆	4	3	78	60	S	26.6397	0.966673	0.983195	596
snf1∆adk1∆	4	4	79	91	S	22.6392	0.934076	0.966476	596
snf1∆adk1∆	6	1	80	88	S	26.1945	0.960168	0.979881	596
snf1∆adk1∆	1	2	84	1	S	14.0876	0.993033	0.99651	596
snf1∆adk1∆	2	1	85	1	S	37.5346	0.973666	0.986745	596
snf1∆adk1∆	5	2	86	1	S	33.454	0.917806	0.958022	596
snf1∆adk1∆	7	1	89	1	S	58.7081	0.893022	0.944999	596
snf1∆adk1∆	1	3	90	1	S	32.4125	0.97786	0.988868	596
