# Supplementary material for: High and stable ATP levels prevent aberrant intracellular protein aggregation in yeast
Source: eLife. 2022 Apr 19;11:e67659. doi: 10.7554/eLife.67659 (PMC9018071; doi:10.7554/eLife.67659)
Supplement: Figure 6—source data 1. [file elife-67659-fig6-data1.xlsx]

## Sheet: fig6B
	ID	file_name	total_cell_number	foci_cell	% cells with Hsp104-RS2 foci			strain	mean	SD	p-value vs wt (Welch test)
	1	snf1adk1_hsp104-RS2_024.nd2	120	24	20			wt	14.897	2.2494
	2	snf1adk1_hsp104-RS2_025.nd2	145	36	24.828			snf1adk1	25.912	3.84656	8.16331e-06
	3	snf1adk1_hsp104-RS2_026.nd2	121	28	23.14
	4	snf1adk1_hsp104-RS2_027.nd2	119	31	26.05
	5	snf1adk1_hsp104-RS2_028.nd2	135	48	35.556
	6	snf1adk1_hsp104-RS2_029.nd2	114	29	25.439
	13	snf1adk1_hsp104-RS2_019.nd2	77	18	23.377
	14	snf1adk1_hsp104-RS2_020.nd2	82	22	26.829
	15	snf1adk1_hsp104-RS2_021.nd2	63	16	25.397
	16	snf1adk1_hsp104-RS2_022.nd2	77	21	27.273
	17	snf1adk1_hsp104-RS2_023.nd2	70	19	27.143
	20	wt_hsp104-RS2_014.nd2	260	31	11.923
	21	wt_hsp104-RS2_015.nd2	296	45	15.203
	22	wt_hsp104-RS2_016.nd2	312	51	16.346
	23	wt_hsp104-RS2_017.nd2	342	46	13.45
	24	wt_hsp104-RS2_018.nd2	279	49	17.563

## Sheet: fig6D
Time (min)	QUEEN ratio	Hsp104-RS2	regression line
0	2.21172	730.172	710.757		slope	0.681331
4	2.24812	727.697	713.483		intercept	710.757
8	2.18154	726.418	716.208		RSQ	0.973954
12	2.17016	733.554	718.933		Corr. Coef.	0.986891
16	2.26901	740.987	721.658
20	2.22728	742.626	724.384
24	2.24239	738.219	727.109
28	2.31152	749.206	729.834
32	2.30421	749.978	732.56
36	2.31828	746.985	735.285
40	2.02146	744.792	738.01
44	2.26371	759.867	740.736
48	2.33367	751.608	743.461
52	2.24478	748.386	746.186
56	2.35217	750.614	748.912
60	2.28926	749.398	751.637
64	2.36557	761.852	754.362
68	2.32504	755.53	757.088
72	2.33397	758.842	759.813
76	2.34195	759.407	762.538
80	2.35182	753.104	765.264
84	2.37484	755.375	767.989
88	2.25571	769.659	770.714
92	2.38405	763.571	773.44
96	2.43306	763.688	776.165
100	2.34957	761.592	778.89
104	2.17687	765.934	781.616
108	2.21269	760.979	784.341
112	2.21333	767.573	787.066
116	2.27344	764.223	789.792
120	2.13719	776.053	792.517
124	2.14681	781.627	795.242
128	2.31234	784.568	797.968
132	2.29044	785.566	800.693
136	2.23233	792.491	803.418
140	2.13234	792.277	806.144
144	2.21735	797.574	808.869
148	2.13816	792.096	811.594
152	2.17685	799.703	814.319
156	2.149	803.766	817.045
160	2.2108	815.093	819.77
164	2.29453	815.07	822.495
168	2.23798	816.099	825.221
172	2.19865	822.978	827.946
176	2.13067	813.309	830.671
180	2.20636	829.22	833.397
184	2.27305	824.075	836.122
188	2.33814	837.955	838.847
192	2.3264	847.927	841.573
196	2.34272	842.524	844.298
200	2.32957	852.694	847.023
204	2.19144	862.653	849.749
208	2.21106	863.781	852.474
212	2.30158	853.581	855.199
216	2.21544	851.363	857.925
220	2.23776	858.269	860.65
224	2.2153	870.622	863.375
228	2.29141	880.625	866.101
232	2.16768	870.787	868.826
236	2.2555	887.505	871.551
240	2.16672	884.458	874.277
244	2.26288	885.64	877.002
248	2.20542	880.234	879.727
252	2.17457	888.251	882.453
256	2.16988	889.266	885.178
260	2.20221	889.806	887.903
264	2.26714	895.152	890.629
268	2.17831	896.863	893.354
272	2.17728	905.556	896.079
276	2.19196	902.628	898.804
280	2.23093	902.139	901.53
284	2.17899	895.393	904.255
288	2.12706	903.173	906.98
292	2.13456	916.584	909.706
296	2.14573	916.349	912.431
300	2.17416	936.257	915.156
304	2.19201	931.476	917.882
308	2.15734	929.071	920.607
312	2.14585	934.524	923.332
316	2.13435	930.048	926.058
320	2.14928	909.848	928.783
324	2.14955	912.734	931.508
328	2.18499	926.74	934.234
332	2.18573	929.652	936.959
336	2.067	947.523	939.684
340	2.14428	956.414	942.41
344	2.15192	956.146	945.135
348	2.15956	954.102	947.86
352	2.19053	949.284	950.586
356	2.15852	954.068	953.311

## Sheet: fig6F
Time (min)	QUEEN ratio	Hsp104-RS2	regression line
0	1.71108	698.995	674.949		slope	0.543926
4	1.75982	705.777	677.125		intercept	674.949
8	1.82178	701.384	679.301		RSQ	0.977996
12	1.74822	696.043	681.476		Corr. Coef.	0.988937
16	1.85099	702.108	683.652
20	1.74013	701.868	685.828
24	1.75989	699.997	688.003
28	1.81449	697.126	690.179
32	1.76815	698.634	692.355
36	1.69811	707.495	694.531
40	1.83982	709.53	696.706
44	1.723	713.352	698.882
48	1.69533	709.667	701.058
52	1.6981	705.968	703.233
56	1.72593	709.753	705.409
60	1.7766	711.457	707.585
64	1.59024	719.177	709.76
68	1.72002	717.231	711.936
72	1.54592	721.93	714.112
76	1.72655	715.306	716.288
80	1.73699	716.879	718.463
84	1.66229	731.315	720.639
88	1.70729	735.212	722.815
92	1.79713	734.487	724.99
96	1.71451	735.473	727.166
100	1.71459	733.196	729.342
104	1.76683	728.812	731.518
108	1.71037	742.634	733.693
112	1.67353	737.699	735.869
116	1.7285	739.774	738.045
120	1.73166	744.392	740.22
124	1.76348	748.72	742.396
128	1.75293	743.263	744.572
132	1.71146	737.667	746.747
136	1.66902	748.944	748.923
140	1.81957	744.024	751.099
144	1.78617	752.578	753.275
148	1.79399	747.645	755.45
152	1.72498	761.97	757.626
156	1.79441	752.938	759.802
160	1.72717	759.204	761.977
164	1.7363	764.013	764.153
168	1.63993	753.968	766.329
172	1.65314	758.801	768.504
176	1.76119	762.532	770.68
180	1.7774	775	772.856
184	1.80096	759.126	775.032
188	1.77335	766.03	777.207
192	1.70683	763.804	779.383
196	1.64729	778.382	781.559
200	1.69822	775.137	783.734
204	1.6916	768.086	785.91
208	1.77296	780.118	788.086
212	1.6784	794.277	790.262
216	1.70278	790.798	792.437
220	1.76423	789.358	794.613
224	1.81773	787.61	796.789
228	1.72941	795.016	798.964
232	1.76229	787.099	801.14
236	1.71897	789.841	803.316
240	1.76179	787.718	805.491
244	1.76245	795.739	807.667
248	1.85074	786.874	809.843
252	1.72637	780.847	812.019
256	1.66841	786.296	814.194
260	1.65087	784.25	816.37
264	1.74553	796.164	818.546
268	1.69269	797.363	820.721
272	1.70964	808.355	822.897
276	1.75002	812.344	825.073
280	1.75672	810.39	827.248
284	1.70621	810.21	829.424
288	1.73151	813.481	831.6
292	1.66202	810.61	833.776
296	1.7653	833.911	835.951
300	1.69553	820.425	838.127
304	1.73609	824.073	840.303
308	1.76057	823.823	842.478
312	1.84522	834.126	844.654
316	1.76364	839.863	846.83
320	1.76745	834.083	849.006
324	1.67226	845.392	851.181
328	1.73079	849.796	853.357
332	1.78932	844.177	855.533
336	1.79968	838.094	857.708
340	1.73642	844.946	859.884
344	1.74248	872.304	862.06
348	1.88184	864.333	864.235
352	1.82155	866.879	866.411
356	1.84382	853.874	868.587
360	1.878	868.226	870.763
364	1.81644	886.556	872.938
368	1.87687	886.844	875.114
372	1.87008	888.497	877.29
376	1.79756	881.511	879.465
380	1.74796	874.237	881.641
384	1.79118	886.202	883.817
388	1.89654	887.113	885.992
392	1.93197	883.543	888.168
396	1.89815	891.599	890.344
400	1.89561	894.962	892.52
404	1.85291	883.229	894.695
408	1.7611	884.145	896.871
412	1.72502	896.656	899.047
416	1.75744	911.215	901.222
420	1.85628	913.038	903.398
424	1.7962	915.997	905.574
428	1.66026	910.137	907.75
432	1.93198	908.505	909.925
436	1.92205	923.567	912.101
440	1.96397	921.379	914.277
444	1.90816	938.376	916.452
448	1.94744	941.521	918.628
452	1.87537	941.333	920.804
456	1.86191	949.282	922.979
460	1.8459	933.105	925.155
464	1.86472	946.742	927.331
468	1.80907	951.618	929.507
472	1.81547	939.368	931.682
476	1.92165	921.672	933.858
480	1.93925	942.672	936.034
484	1.97337	945.876	938.209
488	2.01605	954.401	940.385
492	2.03286	975.04	942.561
496	2.0074	960.271	944.736
500	2.08525	962.753	946.912
504	1.87693	947.247	949.088
508	1.9692	949.761	951.264
512	2.00966	971.938	953.439
516	2.00842	961.145	955.615
520	1.92985	966.226	957.791
524	1.91744	986.242	959.966
528	1.92477	988.903	962.142
532	1.83251	972.624	964.318
536	1.94883	973.349	966.494
540	1.9071	976.806	968.669
544	1.93661	990.919	970.845
548	1.77826	979.562	973.021
552	1.9087	978.126	975.196
556	1.96609	978.519	977.372
560	1.90624	981.532	979.548
564	1.90409	1002.15	981.723
568	1.87312	982.019	983.899
572	1.92226	986.374	986.075
576	1.93606	995.793	988.251
580	1.96072	999.933	990.426
584	1.92074	980.47	992.602
588	1.94705	964.392	994.778
592	1.79895	961.64	996.953
596	1.9025	949.651	999.129
