# Supplementary material for: High and stable ATP levels prevent aberrant intracellular protein aggregation in yeast
Source: eLife. 2022 Apr 19;11:e67659. doi: 10.7554/eLife.67659 (PMC9018071; doi:10.7554/eLife.67659)
Supplement: Figure 7—figure supplement 1—source data 1. [file elife-67659-fig7-figsupp1-data1.xlsx]

## Sheet: fig7-supp1B
Time (min)	QUEEN ratio	Hsp104-RS2	regression line
0	1.28255	827.059	840.141
4	1.31355	840.326	842.574
8	1.4013	839.056	845.007
12	1.32377	852.441	847.44
16	1.33222	850.158	849.872
20	1.36801	859.705	852.305
24	1.44952	840.492	854.738
28	1.3587	865.361	857.171
32	1.44112	863.307	859.603
36	1.34775	879.312	862.036
40	1.44011	866.852	864.469
44	1.50404	859.674	866.901
48	1.38581	863.168	869.334
52	1.47682	877.64	871.767
56	1.55796	879.366	874.2
60	1.50675	875.017	876.632
64	1.49816	881.485	879.065
68	1.60967	881.399	881.498
72	1.52922	885.475	883.931
76	1.502	893.549	886.363
80	1.42884	902.588	888.796
84	1.46376	891.218	891.229
88	1.50738	897.548	893.661
92	1.42199	884.005	896.094
96	1.46562	890.248	898.527
100	1.50195	896.308	900.96
104	1.4955	893.318	903.392
108	1.43642	905.71	905.825
112	1.54174	905.61	908.258
116	1.53621	916.47	910.691
120	1.51283	922.233	913.123
124	1.42805	919.011	915.556
128	1.56051	934.819	917.989
132	1.49491	927.193	920.421
136	1.47023	921.643	922.854
140	1.42439	931.58	925.287
144	1.48467	924.408	927.72
148	1.54745	936.546	930.152
152	1.42289	927.712	932.585
156	1.41376	927.247	935.018
160	1.48602	928.948	937.451
164	1.46415	926.316	939.883
168	1.37385	940.741	942.316
172	1.44669	923.982	944.749
176	1.44429	923.385	947.181
180	1.34911	940.499	949.614
184	1.34405	950.892	952.047
188	1.29996	951.22	954.48
192	1.35732	962.944	956.912
196	1.41729	952.828	959.345
200	1.40154	967.017	961.778
204	1.48291	969.109	964.211
208	1.46164	973.726	966.643
212	1.46942	978.853	969.076
216	1.47259	978.65	971.509
220	1.53335	988.954	973.941
224	1.10644	1018.66	976.374
228	1.12843	1032.52	978.807
232	1.16974	1024.77	981.24
236	1.21905	1020.47	983.672
240	1.47531	1036.89	986.105
244	1.57432	1040.76	988.538
248	1.54452	1038.93	990.97
252	1.45032	1030.26	993.403
256	1.50028	1028.31	995.836
260	1.40775	1024.09	998.269
264	1.52882	1037.06	1000.7
268	1.46828	1043.59	1003.13
272	1.44124	1054.89	1005.57
276	1.4142	1052.61	1008
280	1.4924	1060.06	1010.43
284	1.60056	1058.01	1012.87
288	1.50449	1072.13	1015.3
292	1.50899	1077.19	1017.73
296	1.46412	1189.13	1020.16
300	1.47314	1208.8	1022.6
304	1.44084	1198.81	1025.03
308	1.39754	1214.39	1027.46
312	1.401	1226.91	1029.89
316	1.44253	1231.68	1032.33
320	1.51486	1234.67	1034.76
324	1.47745	1258.41	1037.19
328	1.49832	1264.25	1039.63
332	1.5749	1268.58	1042.06
336	1.50057	1283.58	1044.49
340	1.59319	1303.11	1046.92
344	1.45669	1309.88	1049.36
348	1.47788	1316.84	1051.79
352	1.46363	1346.07	1054.22
356	1.45274	1358.14	1056.65
360	1.47966	1356.53	1059.09
364	1.46077	1349.53	1061.52
368	1.40088	1366.05	1063.95
372	1.41931	1359.98	1066.38
376	1.5299	1380.39	1068.82
380	1.44382	1381.31	1071.25
384	1.50185	1401.95	1073.68
388	1.46244	1408.84	1076.12
392	1.52101	1394.01	1078.55
396	1.4344	1384.53	1080.98
400	1.47249	1372.87	1083.41
404	1.51403	1395.98	1085.85
408	1.40207	1386.53	1088.28
412	1.47322	1388.08	1090.71
416	1.48366	1364.01	1093.14
420	1.52814	1381.5	1095.58
424	1.56553	1366.98	1098.01
428	1.36773	1342.92	1100.44
432	1.49588	1382.69	1102.88
436	1.52905	1381.49	1105.31
440	1.46928	1392.12	1107.74
444	1.48547	1452.78	1110.17
448	1.43239	1469.45	1112.61
452	1.35719	1476.63	1115.04
456	1.4217	1455.27	1117.47
460	1.44512	1478.67	1119.9
464	1.50059	1467.41	1122.34
468	1.47572	1494.14	1124.77
472	1.45885	1515.8	1127.2
476	1.40292	1525.2	1129.64
480	1.38113	1496.66	1132.07
484	1.39333	1480.57	1134.5
488	1.31283	1480.11	1136.93
492	1.30416	1455.9	1139.37
496	1.32917	1471.73	1141.8
500	1.41449	1465.28	1144.23
504	1.44986	1495.02	1146.66
508	1.43314	1499.62	1149.1
512	1.37056	1477.18	1151.53
516	1.34258	1492.16	1153.96
520	1.33181	1480.28	1156.4
524	1.42489	1464.48	1158.83
528	1.3508	1457.97	1161.26
532	1.44627	1463.76	1163.69
536	1.38533	1478.08	1166.13
540	1.43907	1476.25	1168.56
544	1.34837	1451.21	1170.99
548	1.33647	1409.09	1173.42
552	1.42612	1401.16	1175.86
556	1.30633	1446.06	1178.29
560	1.33553	1444.52	1180.72

## Sheet: fig7-supp1C
upper left					upper right					lower right					lower left
Time (min)	QUEEN ratio	Hsp104-RS2	regression line		Time (min)	QUEEN ratio	Hsp104-RS2	regression line		Time (min)	QUEEN ratio	Hsp104-RS2	regression line		Time (min)	QUEEN ratio	Hsp104-RS2	regression line
0	2.06076	903.646	869.328		0	2.09903	777.467	772.2		0	1.99266	883.855	883.614		0	2.04039	759.719	766.272
4	2.0389	916.436	869.962		4	1.99097	787.243	777.436		4	2.00425	875.388	889.107		4	1.9261	766.303	767.768
8	2.03201	901.068	870.596		8	1.94166	778.433	782.672		8	1.94298	888.426	894.6		8	1.95426	773.188	769.265
12	2.04246	894.887	871.231		12	1.89268	782.86	787.909		12	2.09014	900.455	900.092		12	1.87016	774.413	770.761
16	2.02474	900.484	871.865		16	2.09661	792.907	793.145		16	1.9775	914.019	905.585		16	2.01788	772.31	772.257
20	1.97408	911.725	872.499		20	2.02459	795.28	798.381		20	1.94219	920.173	911.078		20	1.94615	783.155	773.753
24	2.01637	887.694	873.133		24	1.89733	808.843	803.617		24	1.94316	923.181	916.571		24	1.87764	770.544	775.249
28	1.89354	891.397	873.768		28	1.97186	812.003	808.853		28	2.00989	926.155	922.064		28	1.78935	773.742	776.745
32	1.98787	886.36	874.402		32	1.92924	828.6	814.089		32	1.90088	946.66	927.557		32	1.68574	778.841	778.241
36	1.9801	869.555	875.036		36	1.88389	819.917	819.326		36	2.02601	936.437	933.049		36	1.75758	779.843	779.737
40	1.91954	869.405	875.67		40	2.00736	811.607	824.562		40	2.07764	941.477	938.542		40	1.60168	778.017	781.233
44	1.81066	876.666	876.304		44	1.94742	815.99	829.798		44	1.9956	947.468	944.035		44	1.84471	779.452	782.73
48	1.98508	877.011	876.939		48	1.87643	833.533	835.034		48	2.08291	955.311	949.528		48	1.78453	790.72	784.226
52	1.95674	890.895	877.573		52	1.88534	833.85	840.27		52	2.09265	941.974	955.021		52	1.85542	788.357	785.722
56	1.91989	877.263	878.207		56	1.91072	823.267	845.506		56	1.98855	942.74	960.514		56	1.88825	782.573	787.218
60	2.03871	861.958	878.841		60	1.99704	838.92	850.743		60	2.01682	962.598	966.006		60	1.11696	793.792	788.714
64	1.94626	854.629	879.476		64	1.85748	874.03	855.979		64	1.96079	967.587	971.499		64	1.13478	808.378	790.21
68	1.92708	868.156	880.11		68	1.90115	874.687	861.215		68	2.04139	986.667	976.992		68	1.33565	870.319	791.706
72	1.84288	853.958	880.744		72	1.9156	870.73	866.451		72	2.04606	990.948	982.485		72	1.17618	846.064	793.202
76	2.02336	872.989	881.378		76	1.96039	883.12	871.687		76	2.0099	985.662	987.978		76	1.32294	858.494	794.699
80	2.01085	862.184	882.013		80	1.96814	878.847	876.924		80	1.95871	989.307	993.47		80	1.75495	846.964	796.195
84	1.91893	876.595	882.647		84	2.0316	878.703	882.16		84	1.96561	1003.79	998.963		84	1.68744	833.755	797.691
88	1.95546	871.224	883.281		88	2.00054	881.433	887.396		88	2.04714	998.56	1004.46		88	1.68055	875.533	799.187
92	2.03123	855.85	883.915		92	1.9623	880.957	892.632		92	1.96851	998.798	1009.95		92	1.71566	871.001	800.683
96	2.0395	865.963	884.549		96	1.80482	909.137	897.868		96	1.94922	1002.47	1015.44		96	1.71913	893.165	802.179
100	1.88658	856.431	885.184		100	1.85702	913.747	903.104		100	2.01166	998.539	1020.93		100	1.88541	850.953	803.675
104	1.94851	862.603	885.818		104	1.8928	902.897	908.341		104	1.92504	1028.57	1026.43		104	1.90823	834.521	805.171
108	2.01582	838.558	886.452		108	1.91955	911.867	913.577		108	1.87497	1043.47	1031.92		108	1.90978	824.186	806.667
112	1.9825	853.575	887.086		112	1.93343	929.933	918.813		112	2.03318	1036.03	1037.41		112	2.10623	825.432	808.164
116	1.93883	868.921	887.721		116	1.84463	909.317	924.049		116	1.94728	1040.06	1042.91		116	2.09757	813.041	809.66
120	1.98255	854.286	888.355		120	1.67301	920.86	929.285		120	1.87253	1041.01	1048.4		120	2.0198	829.519	811.156
124	1.65185	841.204	888.989		124	1.73611	933.85	934.521		124	1.93378	1048.31	1053.89		124	2.07301	854.851	812.652
128	2.02334	853.858	889.623		128	1.81699	926.33	939.758		128	1.80662	1073.43	1059.38		128	2.09671	831.022	814.148
132	1.97034	855.816	890.258		132	1.83974	928.523	944.994		132	1.88085	1055.77	1064.88		132	2.23147	844.847	815.644
136	1.94963	869.49	890.892		136	1.83015	907.097	950.23		136	2.02148	1067.73	1070.37		136	2.16268	846.513	817.14
140	1.99087	887.028	891.526		140	1.85931	906.357	955.466		140	1.969	1081.4	1075.86		140	2.10542	849.385	818.636
144	2.06641	915.688	892.16		144	1.88028	918.493	960.702		144	1.92693	1097.56	1081.36		144	1.9027	842.864	820.132
148	2.04336	895.762	892.794		148	1.75381	958.29	965.939		148	2.02442	1096.8	1086.85		148	2.107	836.378	821.629
152	2.01205	910.567	893.429		152	1.83456	962.797	971.175		152	2.00672	1105.91	1092.34		152	2.05764	849.983	823.125
156	2.04808	912.317	894.063		156	1.78374	970.47	976.411		156	1.64622	1116.58	1097.83		156	2.01451	829.466	824.621
160	2.04451	895.7	894.697		160	1.75329	987.957	981.647		160	1.68428	1129.61	1103.33		160	2.05727	876.488	826.117
164	2.05136	890.518	895.331		164	1.70442	994.303	986.883		164	1.60759	1126.06	1108.82		164	1.90666	866.059	827.613
168	1.95117	894.244	895.966		168	1.71574	978.4	992.119		168	1.47658	1132.99	1114.31		168	1.94122	873.327	829.109
172	1.87565	905.377	896.6		172	1.65954	988.25	997.356		172	1.44883	1142.78	1119.81		172	1.99965	839.352	830.605
176	2.10045	911.147	897.234		176	1.61144	1043.35	1002.59		176	1.42927	1148.82	1125.3		176	1.92741	844.438	832.101
180	2.03801	904.535	897.868		180	1.65337	1032.65	1007.83		180	1.40856	1163.45	1130.79		180	1.93275	857.047	833.597
184	2.03292	918.45	898.503		184	1.62222	1053.76	1013.06		184	1.3627	1166.03	1136.28		184	1.89865	851.108	835.094
188	2.11722	927.578	899.137		188	1.48453	1061.19	1018.3		188	1.25993	1169.93	1141.78		188	1.85847	874.216	836.59
192	2.07536	912.051	899.771		192	1.71712	1064.76	1023.54		192	1.1418	1170.09	1147.27		192	1.99036	873.652	838.086
196	2.18252	913.595	900.405		196	1.75309	1060.73	1028.77		196	1.39198	1168.66	1152.76		196	1.81977	892.758	839.582
200	2.08733	913.7	901.039		200	1.84691	1062.08	1034.01		200	1.8926	1149.98	1158.26		200	1.93514	888.236	841.078
204	2.04484	903.195	901.674		204	1.98111	1094.89	1039.24		204	1.92455	1158.94	1163.75		204	1.97276	852.228	842.574
208	2.08769	906.977	902.308		208	2.01284	1088.65	1044.48		208	2.0032	1157.48	1169.24		208	1.93021	842.744	844.07
212	1.97627	920.482	902.942		212	2.08599	1085.77	1049.72		212	1.98138	1160.98	1174.73		212	2.02653	854.691	845.566
216	2.14643	896.479	903.576		216	2.15835	1076.02	1054.95		216	2.0074	1167.83	1180.23		216	1.93746	840.278	847.063
220	2.17494	897.218	904.211		220	2.07505	1104.38	1060.19		220	1.97386	1165.25	1185.72		220	1.91804	877.805	848.559
224	2.15217	903.496	904.845		224	2.13416	1131.46	1065.43		224	1.98626	1185.22	1191.21		224	1.71878	851.711	850.055
228	2.20569	917.555	905.479		228	2.14793	1132.07	1070.66		228	1.99252	1205.69	1196.7		228	1.79914	859.709	851.551
232	2.16826	919.026	906.113		232	2.10756	1117.73	1075.9		232	1.97913	1205.84	1202.2		232	1.88187	860.64	853.047
236	1.89368	931.878	906.748		236	2.19569	1164.9	1081.13		236	1.95093	1215.38	1207.69		236	1.79195	876.425	854.543
240	2.09965	923.958	907.382		240	2.11915	1178.51	1086.37		240	1.9123	1219.84	1213.18		240	1.91038	897.537	856.039
244	2.19259	928.204	908.016		244	2.17451	1182.43	1091.61		244	1.67437	1231.23	1218.68		244	1.85958	913.482	857.535
248	2.01092	918.323	908.65		248	2.10899	1200.47	1096.84		248	1.91154	1240.24	1224.17		248	1.88058	914.948	859.031
252	2.00936	901.856	909.285		252	2.07317	1210.05	1102.08		252	1.95378	1256.49	1229.66		252	1.8278	931.003	860.528
256	2.04773	887.858	909.919		256	2.15016	1228.03	1107.32		256	1.83627	1262.61	1235.15		256	1.84424	937.306	862.024
260	2.21706	918.567	910.553		260	2.05977	1216.85	1112.55		260	1.86402	1261.2	1240.65		260	1.81404	947.423	863.52
264	2.20681	902.603	911.187		264	2.09789	1259.63	1117.79		264	1.79005	1283.56	1246.14		264	1.87577	959.913	865.016
268	1.89593	903.011	911.821		268	2.05647	1359.2	1123.02		268	1.86704	1275.22	1251.63		268	1.83652	992.769	866.512
272	1.10973	905.734	912.456		272	2.06431	1382.09	1128.26		272	1.86688	1259.53	1257.13		272	1.91614	1028.42	868.008
276	1.70587	891.513	913.09		276	1.98808	1385.83	1133.5		276	1.93438	1290.1	1262.62		276	1.82069	1033.12	869.504
280	2.023	888.677	913.724		280	2.01349	1390.75	1138.73		280	1.83048	1266.78	1268.11		280	1.79504	1044.52	871
284	1.94715	893.771	914.358		284	2.04831	1413.78	1143.97		284	1.93581	1271.37	1273.6		284	1.75395	1059.44	872.496
288	2.10883	895.108	914.993		288	1.96664	1418.74	1149.2		288	1.94849	1273.36	1279.1		288	1.81922	1029.21	873.993
292	2.06569	896.201	915.627		292	1.97429	1472.86	1154.44		292	1.8904	1303.71	1284.59		292	1.82712	1064.71	875.489
296	1.96244	901.323	916.261		296	1.91284	1456.77	1159.68		296	1.88162	1291.52	1290.08		296	1.77893	1081.77	876.985
300	2.09923	904.578	916.895		300	1.92753	1476.66	1164.91		300	1.9691	1301.7	1295.58		300	1.88854	1060.21	878.481
304	2.09506	898.734	917.53		304	1.99347	1514.94	1170.15		304	2.04622	1322.13	1301.07		304	1.89653	1055.03	879.977
308	2.11837	927.527	918.164		308	1.80341	1529.81	1175.39		308	1.89165	1324.86	1306.56		308	1.7444	1035.1	881.473
312	2.05282	922.06	918.798		312	1.94074	1502.92	1180.62		312	1.68841	1315.81	1312.05		312	1.82756	1002.06	882.969
316	1.95748	930.799	919.432		316	1.86177	1453.64	1185.86		316	1.93965	1338.57	1317.55		316	1.87185	1030.72	884.465
320	1.99008	937.377	920.066		320	1.81941	1465.1	1191.09		320	1.93968	1355.06	1323.04		320	1.93717	1025.6	885.961
324	1.81647	932.374	920.701		324	1.98982	1485.27	1196.33		324	1.97756	1382.42	1328.53		324	1.9012	1004.3	887.458
328	1.94964	934.249	921.335		328	2.01384	1450.24	1201.57		328	1.95378	1385.21	1334.03		328	2.00336	1008.21	888.954
332	1.7722	945.198	921.969		332	1.98376	1433.74	1206.8		332	1.99745	1388.01	1339.52		332	1.90076	1016.92	890.45
336	1.80878	947.334	922.603		336	2.00626	1519.58	1212.04		336	1.96025	1421.02	1345.01		336	1.86551	985.886	891.946
340	1.89903	948.918	923.238		340	2.01288	1540.23	1217.27		340	1.90331	1424.38	1350.5		340	1.89814	1000.57	893.442
344	1.77865	939.128	923.872		344	1.98572	1490.17	1222.51		344	2.02812	1442.84	1356		344	1.89929	1009.22	894.938
348	1.79895	948.479	924.506		348	1.90786	1510.37	1227.75		348	1.90568	1442.97	1361.49		348	1.84996	1013.16	896.434
352	1.72886	950.108	925.14		352	1.89795	1466.39	1232.98		352	1.90517	1460.78	1366.98		352	1.82201	1002.79	897.93
356	1.93744	950.677	925.775		356	1.93855	1528.38	1238.22		356	1.91676	1489.28	1372.48		356	1.95733	1028.06	899.427
360	2.11097	950.416	926.409		360	1.86498	1444.75	1243.46		360	1.89683	1501.38	1377.97		360	1.76133	1018.78	900.923
364	2.12039	957.654	927.043		364	1.87535	1440.25	1248.69		364	1.83508	1509.03	1383.46		364	1.81582	1034.52	902.419
368	2.10041	1013.02	927.677		368	1.67046	1415.34	1253.93		368	1.63882	1513.06	1388.95		368	1.88154	1002.12	903.915
372	2.13247	1043.77	928.311		372	1.70514	1435.57	1259.16		372	1.91907	1533.62	1394.45		372	1.78571	1026.4	905.411
376	2.11309	1034.63	928.946		376	1.66183	1441.52	1264.4		376	1.91233	1538.21	1399.94		376	1.73891	992.643	906.907
380	2.07967	1055.92	929.58		380	1.69744	1454.27	1269.64		380	1.95926	1557.36	1405.43
384	2.26172	1054.01	930.214		384	1.64685	1443.05	1274.87		384	1.84063	1586.14	1410.93
388	2.0543	1064.81	930.848		388	1.64818	1456.88	1280.11		388	1.96724	1622.52	1416.42
392	2.17934	1071.34	931.483		392	1.74646	1448.66	1285.35		392	1.95793	1612.36	1421.91
396	2.02469	1064.64	932.117		396	1.61926	1444.12	1290.58		396	1.64374	1625.59	1427.4
400	2.06106	1046.15	932.751		400	1.67563	1450.59	1295.82		400	1.91841	1659.75	1432.9
404	2.12421	1065.74	933.385		404	1.78547	1456.56	1301.05		404	1.88253	1674.62	1438.39
408	2.14102	1057.31	934.02		408	1.96993	1422.74	1306.29		408	1.96744	1671.89	1443.88
412	2.10689	1068.5	934.654		412	1.94446	1458.36	1311.53		412	1.9304	1693.12	1449.37
416	1.87861	1090.11	935.288		416	1.89291	1503.04	1316.76		416	1.93446	1696.74	1454.87
420	1.89621	1090.45	935.922		420	2.01081	1538.55	1322		420	1.86931	1726.14	1460.36
424	1.94823	1128.63	936.556		424	2.129	1511.42	1327.23		424	1.92414	1743.03	1465.85
428	1.96945	1124.26	937.191		428	2.06727	1550.75	1332.47		428	1.86145	1724.94	1471.35
432	1.94807	1133.47	937.825		432	2.11895	1639.54	1337.71		432	1.88222	1748.88	1476.84
436	1.99578	1139.84	938.459		436	1.84042	1603.45	1342.94		436	1.95233	1752.57	1482.33
440	2.27766	1143.72	939.093		440	1.88894	1588.69	1348.18		440	1.95356	1788.07	1487.82
444	2.21218	1173.8	939.728		444	1.90288	1592.27	1353.42		444	2.04546	1787.18	1493.32
448	2.17984	1135.77	940.362		448	1.9637	1624.54	1358.65		448	1.87948	1807.02	1498.81
452	2.21946	1164.96	940.996		452	1.93033	1656.85	1363.89		452	1.66131	1813.8	1504.3
456	2.17007	1168.06	941.63		456	1.97728	1597.99	1369.12		456	1.89321	1812.25	1509.8
460	2.32405	1166.95	942.265		460	1.82581	1592.91	1374.36		460	1.90352	1862.13	1515.29
464	2.24991	1153.36	942.899		464	1.94108	1564.71	1379.6		464	1.92281	1901.03	1520.78
					468	1.87986	1590.24	1384.83		468	1.96725	1894.9	1526.27
										472	1.85717	1891.12	1531.77
										476	1.93806	1915.89	1537.26
										480	1.92192	1935.93	1542.75
										484	1.88197	1947.36	1548.25
										488	1.91331	1923.83	1553.74
										492	1.9167	1921.8	1559.23
										496	1.94707	1920.11	1564.72
										500	1.88659	1983.53	1570.22
										504	1.85979	1982.2	1575.71
										508	1.85223	1998.95	1581.2
										512	1.9245	2026.14	1586.7
										516	1.86357	2038.03	1592.19
										520	1.95205	2056.08	1597.68
										524	1.96021	2042.6	1603.17
										528	1.95182	2047.72	1608.67
										532	1.88222	2065.01	1614.16
										536	1.86245	2093.61	1619.65
										540	1.87889	2133.82	1625.15
										544	1.7659	2153.41	1630.64
										548	1.73212	2141.63	1636.13
										552	1.78191	2148.13	1641.62
										556	1.82609	2148.91	1647.12
										560	2.04616	2151.68	1652.61
										564	1.89099	2147.12	1658.1
										568	1.7907	2161.97	1663.6
										572	2.02601	2148.78	1669.09
										576	1.81059	2148.23	1674.58
										580	1.96545	2146.37	1680.07
										584	2.05019	2173.01	1685.57
										588	2.01748	2173.8	1691.06
										592	1.82514	2162.33	1696.55
										596	1.93524	2153.73	1702.04
