# Supplementary material for: High and stable ATP levels prevent aberrant intracellular protein aggregation in yeast
Source: eLife. 2022 Apr 19;11:e67659. doi: 10.7554/eLife.67659 (PMC9018071; doi:10.7554/eLife.67659)
Supplement: Figure 7—figure supplement 2—source data 1. [file elife-67659-fig7-figsupp2-data1.xlsx]

## Sheet: fig7-supp2
ID	condition	RMSD
21	stable	42.9784			condition	mean	SD	N	p-value vs stable (Dunnett test)
22	stable	15.3216			stable	30.6612	13.649	38
23	stable	13.555			dip(before)	23.6736	16.9162	25	0.967009
24	stable	19.9422			dip(after0.5h)	60.3629	56.4077	25	0.033663
25	stable	26.3981			dip(after1h)	65.0249	55.3342	25	0.011986
26	stable	22.5125			dip(after2h)	79.1089	60.9827	25	0.000242
27	stable	14.4384			dip(after3h)	91.3403	63.3597	25	<0.0001
28	stable	58.9667
29	stable	41.3808
30	stable	26.0436
31	stable	18.8206
32	dip(before)	6.87375
33	dip(before)	70.8429
34	dip(before)	12.62
35	dip(before)	16.3588
36	dip(before)	31.9888
37	dip(before)	26.6019
38	stable	29.9368
39	stable	50.333
40	stable	14.1309
41	stable	24.7588
42	stable	42.5743
43	stable	38.0831
44	stable	29.8454
45	stable	30.471
46	stable	24.7535
47	dip(before)	44.8829
50	dip(before)	18.3763
51	dip(before)	23.0161
52	dip(before)	57.7109
53	dip(before)	32.7098
54	stable	29.4129
55	stable	31.8367
56	stable	20.8124
57	stable	77.7204
58	stable	19.131
59	stable	28.6334
60	dip(before)	36.06
62	dip(before)	9.27621
64	dip(before)	12.9958
65	dip(before)	21.137
67	dip(before)	11.3641
70	stable	30.2613
71	stable	25.9463
72	dip(before)	9.37188
73	dip(before)	15.7308
74	dip(before)	9.63394
75	dip(before)	47.2697
76	stable	27.4294
77	stable	37.0283
78	stable	26.6397
79	stable	22.6392
80	stable	26.1945
81	dip(before)	9.45229
82	dip(before)	8.64146
83	dip(before)	7.97993
84	stable	14.0876
85	stable	37.5346
86	stable	33.454
87	dip(before)	30.6461
88	dip(before)	20.2998
89	stable	58.7081
90	stable	32.4125
32	dip(after0.5h)	31.8795
33	dip(after0.5h)	130.218
34	dip(after0.5h)	67.9704
35	dip(after0.5h)	39.5144
36	dip(after0.5h)	36.9
37	dip(after0.5h)	32.7675
47	dip(after0.5h)	230.168
50	dip(after0.5h)	32.2832
51	dip(after0.5h)	196.279
52	dip(after0.5h)	100.941
53	dip(after0.5h)	26.8504
60	dip(after0.5h)	44.7173
62	dip(after0.5h)	26.5942
64	dip(after0.5h)	57.3464
65	dip(after0.5h)	16.0532
67	dip(after0.5h)	20.8863
72	dip(after0.5h)	21.3932
73	dip(after0.5h)	31.942
74	dip(after0.5h)	15.2865
75	dip(after0.5h)	111.945
81	dip(after0.5h)	30.6901
82	dip(after0.5h)	43.6047
83	dip(after0.5h)	7.1788
87	dip(after0.5h)	104.922
88	dip(after0.5h)	50.7412
32	dip(after1h)	44.9636
33	dip(after1h)	145.613
34	dip(after1h)	64.467
35	dip(after1h)	58.6444
36	dip(after1h)	38.3027
37	dip(after1h)	32.532
47	dip(after1h)	214
50	dip(after1h)	26.7052
51	dip(after1h)	178.078
52	dip(after1h)	151.054
53	dip(after1h)	30.5795
60	dip(after1h)	82.9072
62	dip(after1h)	21.3871
64	dip(after1h)	52.9718
65	dip(after1h)	15.6496
67	dip(after1h)	25.0683
72	dip(after1h)	20.6147
73	dip(after1h)	46.084
74	dip(after1h)	13.2933
75	dip(after1h)	106.65
81	dip(after1h)	38.4691
82	dip(after1h)	42.3365
83	dip(after1h)	8.03049
87	dip(after1h)	110.482
88	dip(after1h)	56.7388
32	dip(after2h)	106.737
33	dip(after2h)	247.335
34	dip(after2h)	98.3237
35	dip(after2h)	58.5623
36	dip(after2h)	48.4248
37	dip(after2h)	97.3438
47	dip(after2h)	168.506
50	dip(after2h)	32.8459
51	dip(after2h)	134.135
52	dip(after2h)	191.624
53	dip(after2h)	28.6527
60	dip(after2h)	76.8173
62	dip(after2h)	18.3345
64	dip(after2h)	39.6954
65	dip(after2h)	31.439
67	dip(after2h)	22.086
72	dip(after2h)	19.7266
73	dip(after2h)	85.8845
74	dip(after2h)	15.9436
75	dip(after2h)	103.408
81	dip(after2h)	47.5537
82	dip(after2h)	134.149
83	dip(after2h)	10.8569
87	dip(after2h)	112.431
88	dip(after2h)	46.9086
32	dip(after3h)	154.33
33	dip(after3h)	255.25
34	dip(after3h)	150.953
35	dip(after3h)	79.8601
36	dip(after3h)	44.8561
37	dip(after3h)	121.048
47	dip(after3h)	149.413
50	dip(after3h)	39.2964
51	dip(after3h)	114.158
52	dip(after3h)	173.504
53	dip(after3h)	51.9972
60	dip(after3h)	71.4862
62	dip(after3h)	16.5846
64	dip(after3h)	38.6799
65	dip(after3h)	87.1864
67	dip(after3h)	23.0731
72	dip(after3h)	21.3931
73	dip(after3h)	118.287
74	dip(after3h)	49.5516
75	dip(after3h)	113.089
81	dip(after3h)	43.9056
82	dip(after3h)	203.666
83	dip(after3h)	14.9167
87	dip(after3h)	98.6983
88	dip(after3h)	48.325
