# Supplementary material for: High and stable ATP levels prevent aberrant intracellular protein aggregation in yeast
Source: eLife. 2022 Apr 19;11:e67659. doi: 10.7554/eLife.67659 (PMC9018071; doi:10.7554/eLife.67659)
Supplement: Figure 7—source data 1. [file elife-67659-fig7-data1.xlsx]

## Sheet: fig7B
Time (min)	QUEEN ratio	Hsp104-RS2	regression line
0	1.76162	924.82	925.606
4	1.7012	904.933	926.891
8	1.69883	913.328	928.176
12	1.69647	934.227	929.462
16	1.66472	933.626	930.747
20	1.63298	937.742	932.032
24	1.67813	950.576	933.318
28	1.74235	942.398	934.603
32	1.67132	926.467	935.888
36	1.70045	942.815	937.174
40	1.8332	931.393	938.459
44	1.57516	931.586	939.744
48	1.73498	945.009	941.029
52	1.7454	947.933	942.315
56	1.70412	964.978	943.6
60	1.77173	972.557	944.885
64	1.69636	962.479	946.171
68	1.76379	961.909	947.456
72	1.82975	957.631	948.741
76	1.77924	963.562	950.027
80	1.77132	956.333	951.312
84	1.77917	941.553	952.597
88	1.8088	943.385	953.883
92	1.62421	957.183	955.168
96	1.79503	970.146	956.453
100	1.81824	969.241	957.739
104	1.89116	956.981	959.024
108	1.70093	984.891	960.309
112	1.85069	1009	961.594
116	1.71647	994.342	962.88
120	1.61623	935.701	964.165
124	1.65756	950.652	965.45
128	1.69889	956.056	966.736
132	1.66779	892.239	968.021
136	1.70732	882.76	969.306
140	1.74653	901.301	970.592
144	1.73321	949.531	971.877
148	1.7343	922.054	973.162
152	1.67377	998.528	974.448
156	1.70414	969.143	975.733
160	1.76296	970.138	977.018
164	1.74967	967.785	978.304
168	1.78238	958.239	979.589
172	1.68733	991.961	980.874
176	1.75374	990.941	982.159
180	1.71415	994.686	983.445
184	1.71832	999.041	984.73
188	1.72248	1025.25	986.015
192	1.73611	1015.6	987.301
196	1.76973	1018.77	988.586
200	1.79605	1021.26	989.871
204	1.31494	1020.61	991.157
208	1.30985	1026.43	992.442
212	1.12148	1032.07	993.727
216	1.2235	1022.67	995.013
220	1.57706	1028.77	996.298
224	1.7852	1034.73	997.583
228	1.92159	1033.83	998.868
232	1.80217	1027.8	1000.15
236	1.89274	1035.21	1001.44
240	1.73597	1021.32	1002.72
244	1.86854	1014.68	1004.01
248	1.74198	1039.02	1005.3
252	1.74153	1067.62	1006.58
256	1.76841	1036.13	1007.87
260	1.81006	1012.09	1009.15
264	1.78156	1060.27	1010.44
268	1.75305	1077	1011.72
272	1.72142	1105.66	1013.01
276	1.69993	1106.97	1014.29
280	1.84652	1136.2	1015.58
284	1.69965	1115.13	1016.86
288	1.72082	1136.09	1018.15
292	1.77067	1152.47	1019.43
296	1.70045	1161.5	1020.72
300	1.68185	1186.91	1022
304	1.77236	1203.94	1023.29
308	1.69728	1195.94	1024.57
312	1.77449	1209.26	1025.86
316	1.71019	1170.04	1027.15
320	1.66532	1212.86	1028.43
324	1.7877	1174.51	1029.72
328	1.78366	1179.82	1031
332	1.74643	1249.03	1032.29
336	1.70919	1174.62	1033.57
340	1.84996	1202.54	1034.86
344	1.83946	1189.43	1036.14
348	1.7804	1195.54	1037.43
352	1.78835	1191.35	1038.71
356	1.64922	1197.78	1040
360	1.77141	1177.53	1041.28
364	1.66221	1197.53	1042.57
368	1.75152	1203.43	1043.85
372	1.59685	1191.44	1045.14
376	1.67045	1221.86	1046.42
380	1.74896	1206.63	1047.71
384	1.72392	1227.78	1049
388	1.63769	1227.94	1050.28
392	1.64059	1250.75	1051.57
396	1.63568	1271.13	1052.85
400	1.69797	1215.52	1054.14
404	1.67827	1255.17	1055.42
408	1.66064	1226.14	1056.71
412	1.70889	1244.76	1057.99
416	1.67241	1260.17	1059.28
420	1.65609	1264.3	1060.56
424	1.71786	1280.68	1061.85
428	1.72316	1298.03	1063.13
432	1.66388	1320.21	1064.42
436	1.6475	1325.02	1065.7
440	1.66978	1332.05	1066.99
444	1.63135	1376.62	1068.28
448	1.63756	1393.54	1069.56
452	1.60109	1392.55	1070.85
456	1.6204	1377.48	1072.13
460	1.58238	1386.93	1073.42
464	1.68177	1433.44	1074.7
468	1.68539	1409.37	1075.99
472	1.65369	1401.18	1077.27
476	1.76639	1399.64	1078.56
480	1.73518	1496.45	1079.84
484	1.66727	1500.3	1081.13
488	1.61146	1569.44	1082.41
492	1.59989	1567.84	1083.7
496	1.66296	1545.8	1084.98
500	1.66626	1531.63	1086.27
504	1.72591	1592.07	1087.55
508	1.63794	1618.45	1088.84
512	1.5684	1634.42	1090.13
516	1.67857	1556.95	1091.41
520	1.63233	1583.63	1092.7
524	1.70458	1627.65	1093.98
528	1.62251	1593.76	1095.27
532	1.62282	1636.83	1096.55
536	1.75312	1629.4	1097.84
540	1.67555	1622.92	1099.12
544	1.73866	1600.08	1100.41
548	1.63273	1648.04	1101.69
552	1.647	1621.06	1102.98
556	1.66126	1645.46	1104.26
560	1.61353	1682.96	1105.55
564	1.67203	1679.73	1106.83
568	1.66004	1689.81	1108.12
572	1.69244	1708.3	1109.41
576	1.71733	1697.19	1110.69
580	1.62782	1728.83	1111.98
584	1.69189	1671.14	1113.26
588	1.68422	1678.07	1114.55
592	1.70026	1677.35	1115.83
596	1.70789	1637.75	1117.12

## Sheet: fig7C
ID	time	RMSD (abs)	RMSD (fold)
32	after0.5h	31.8795	4.63786
32	after1h	44.9636	6.54136
32	after2h	106.737	15.5282
32	after3h	154.33	22.4521
32	before	6.87375	1
33	after0.5h	130.218	1.83813
33	after1h	145.613	2.05544
33	after2h	247.335	3.49131
33	after3h	255.25	3.60304
33	before	70.8429	1
34	after0.5h	67.9704	5.38594
34	after1h	64.467	5.10834
34	after2h	98.3237	7.79113
34	after3h	150.953	11.9615
34	before	12.62	1
35	after0.5h	39.5144	2.41549
35	after1h	58.6444	3.58489
35	after2h	58.5623	3.57987
35	after3h	79.8601	4.88179
35	before	16.3588	1
36	after0.5h	36.9	1.15353
36	after1h	38.3027	1.19738
36	after2h	48.4248	1.5138
36	after3h	44.8561	1.40224
36	before	31.9888	1
37	after0.5h	32.7675	1.23177
37	after1h	32.532	1.22292
37	after2h	97.3438	3.65928
37	after3h	121.048	4.55035
37	before	26.6019	1
47	after0.5h	230.168	5.12819
47	after1h	214	4.76796
47	after2h	168.506	3.75435
47	after3h	149.413	3.32895
47	before	44.8829	1
50	after0.5h	32.2832	1.75679
50	after1h	26.7052	1.45325
50	after2h	32.8459	1.78741
50	after3h	39.2964	2.13843
50	before	18.3763	1
51	after0.5h	196.279	8.52791
51	after1h	178.078	7.73708
51	after2h	134.135	5.82787
51	after3h	114.158	4.95992
51	before	23.0161	1
52	after0.5h	100.941	1.74909
52	after1h	151.054	2.61742
52	after2h	191.624	3.32041
52	after3h	173.504	3.00644
52	before	57.7109	1
53	after0.5h	26.8504	0.820869
53	after1h	30.5795	0.934875
53	after2h	28.6527	0.875967
53	after3h	51.9972	1.58965
53	before	32.7098	1
60	after0.5h	44.7173	1.24008
60	after1h	82.9072	2.29914
60	after2h	76.8173	2.13026
60	after3h	71.4862	1.98242
60	before	36.06	1
62	after0.5h	26.5942	2.86693
62	after1h	21.3871	2.30558
62	after2h	18.3345	1.97651
62	after3h	16.5846	1.78786
62	before	9.27621	1
64	after0.5h	57.3464	4.41267
64	after1h	52.9718	4.07606
64	after2h	39.6954	3.05447
64	after3h	38.6799	2.97633
64	before	12.9958	1
65	after0.5h	16.0532	0.759481
65	after1h	15.6496	0.740386
65	after2h	31.439	1.48739
65	after3h	87.1864	4.12482
65	before	21.137	1
67	after0.5h	20.8863	1.83792
67	after1h	25.0683	2.20592
67	after2h	22.086	1.94349
67	after3h	23.0731	2.03035
67	before	11.3641	1
72	after0.5h	21.3932	2.2827
72	after1h	20.6147	2.19963
72	after2h	19.7266	2.10487
72	after3h	21.3931	2.28269
72	before	9.37188	1
73	after0.5h	31.942	2.03053
73	after1h	46.084	2.92954
73	after2h	85.8845	5.45963
73	after3h	118.287	7.51942
73	before	15.7308	1
74	after0.5h	15.2865	1.58673
74	after1h	13.2933	1.37984
74	after2h	15.9436	1.65494
74	after3h	49.5516	5.14344
74	before	9.63394	1
75	after0.5h	111.945	2.36821
75	after1h	106.65	2.2562
75	after2h	103.408	2.18761
75	after3h	113.089	2.39242
75	before	47.2697	1
81	after0.5h	30.6901	3.24684
81	after1h	38.4691	4.06982
81	after2h	47.5537	5.03092
81	after3h	43.9056	4.64497
81	before	9.45229	1
82	after0.5h	43.6047	5.04599
82	after1h	42.3365	4.89923
82	after2h	134.149	15.5239
82	after3h	203.666	23.5684
82	before	8.64146	1
83	after0.5h	7.1788	0.899607
83	after1h	8.03049	1.00634
83	after2h	10.8569	1.36053
83	after3h	14.9167	1.86928
83	before	7.97993	1
87	after0.5h	104.922	3.42368
87	after1h	110.482	3.60509
87	after2h	112.431	3.66868
87	after3h	98.6983	3.22059
87	before	30.6461	1
88	after0.5h	50.7412	2.49958
88	after1h	56.7388	2.79504
88	after2h	46.9086	2.31078
88	after3h	48.325	2.38056
88	before	20.2998	1

## Sheet: fig7D
strain	series	cell #	ID	start frame	start_of_dip	after_dip	max_RMSD_fold_during3h	max_RMSD_fold_over3
snf1∆adk1∆	3	1	32	82	128	192	22.4521	22.4521
snf1∆adk1∆	5	3	33	20	340	220	3.60304	3.60304
snf1∆adk1∆	5	5	34	20	432	212	11.9615	11.9615
snf1∆adk1∆	6	1	35	1	200	276	4.88179	4.88179
snf1∆adk1∆	6	3	36	30	488	316	1.5138
snf1∆adk1∆	7	1	37	1	200	396	4.55035	4.55035
snf1∆adk1∆	1	1	47	100	392	196	5.12819	5.12819
snf1∆adk1∆	2	3	50	1	328	308	2.13843
snf1∆adk1∆	6	1	51	140	244	184	8.52791	8.52791
snf1∆adk1∆	7	1	52	1	168	248	3.32041	3.32041
snf1∆adk1∆	7	2	53	1	528	272	1.58965
snf1∆adk1∆	2	1	60	1	92	504	2.29914
snf1∆adk1∆	5	1	62	50	160	440	2.86693
snf1∆adk1∆	1	1	64	1	148	128	4.41267	4.41267
snf1∆adk1∆	1	2	65	100	252	212	4.12482	4.12482
snf1∆adk1∆	6	1	67	60	196	428	2.20592
snf1∆adk1∆	4	2	72	1	148	448	2.2827
snf1∆adk1∆	5	1	73	1	224	372	7.51942	7.51942
snf1∆adk1∆	7	1	74	1	176	420	5.14344	5.14344
snf1∆adk1∆	7	2	75	60	300	296	2.39242
snf1∆adk1∆	1	1	81	1	200	464	5.03092	5.03092
snf1∆adk1∆	3	1	82	10	220	340	23.5684	23.5684
snf1∆adk1∆	6	1	83	93	140	488	1.86928
snf1∆adk1∆	5	3	87	1	332	264	3.66868	3.66868
snf1∆adk1∆	5	1	88	77	348	252	2.79504
